# Supplementary material for: Taking the pulse of Mars via dating of a plume-fed volcano
Source: Springer Nature journal article supplement (doi:10.1038/s41467-017-00513-8), 2017-09-15
Supplement: MOESM2 [file 41467_2017_513_MOESM2_ESM.xlsx]

## Sheet: Laf1
COMPLETE 40Ar/39Ar INCREMENTAL HEATING RESULTS
#	Run ID	Laser Power	40Ar ± 1s			39Ar ± 1s			38Ar ± 1s			37Ar ± 1s			36Ar ± 1s			40Ar* (%) ± 1s			40Aratm (%)	40ArK (%)	39ArK (%)	39ArCa (%)	38Arcos (%)	38Aratm (%)	38ArCl (%)	38ArCa (%)	38ArK (%)	37ArCa (%)	37ArK (%)	36Arcos (%)	36Aratm (%)	36ArCa (%)	Ca/K	Cl/K	Apparent Age ± 1s (Ma)
Lafayette groundmass								J =	0.019915	±	6e-05
1	90576-01A	5	-0.0015586	±	0.0002769	1.55e-05	±	3.55e-05	-4.8e-05	±	3.18e-05	0.0034808	±	0.0017974	-1.12988e-06	±	5.15338e-06	-690.815	±	-613.731	790.816	-0.000612666	84.3926	15.6074	-18.8136	3.09458	116.194	-0.142133	-0.332472	99.9999	8.41792e-05	-517.645	699.283	-81.638	513.571	-12.3648	5164.14	±	4859.8
2	90576-01B	6	-0.0002879	±	0.0002508	1.33e-05	±	3.18e-05	1.57e-05	±	3.09e-05	-0.0025394	±	0.0016573	3.64754e-06	±	4.70919e-06	4735.06	±	5086.31	-4635.05	-0.00381986	113.27	-13.2698	-41.6346	10.2431	130.538	-0.317021	1.17065	100	-0.000132887	-116.066	234.515	-18.4492	-325.329	3.94519	#NUM!	±	4218.86
3	90576-01C	6.5	0.0173399	±	0.0002885	0.0002296	±	3.11e-05	4.18e-05	±	2.67e-05	0.008266	±	0.0018748	2.14e-05	±	4.69816e-06	54.4878	±	51.8137	45.5112	0.000942418	97.4979	2.50211	52.27	2.27521	38.5337	0.38759	6.53357	99.9994	0.000606624	66.1253	23.6389	10.2359	71.2661	0.208664	1103.08	±	793.458
4	90576-01D	6.6	0.0141588	±	0.0002853	0.0001932	±	3.19e-05	-2.47e-05	±	2.69e-05	0.008491	±	0.0018271	4.54e-05	±	5.26494e-06	-215.903	±	-69.1282	315.902	0.000965676	96.9455	3.05446	-90.5031	-21.823	222.251	-0.673776	-9.2512	99.9995	0.000494111	31.8902	63.1536	4.95618	87.4942	-0.84997	#NUM!	±	945.852
5	90576-01E	6.7	0.111472	±	0.0004295	0.0018913	±	2.96e-05	8.9e-05	±	2.7e-05	-0.0004761	±	0.0017312	5.81e-05	±	5.27954e-06	20.988	±	11.989	79.0108	0.00123878	100.018	-0.0175109	3.06729	11.926	59.087	-0.0104942	25.9302	100.089	-0.0889992	3.04314	97.1742	-0.217347	-0.486189	0.0806201	398.131	±	204.2
6	90576-01F	6.8	0.0885929	±	0.0003701	0.0015137	±	2.83e-05	7.02e-05	±	2.2e-05	0.0017127	±	0.0017582	4.33e-05	±	4.77066e-06	33.2168	±	12.502	66.782	0.0012463	99.9214	0.0786213	10.8224	10.1567	52.6873	0.0478095	26.2858	99.9802	0.0197818	11.3638	87.5882	1.04798	2.18502	0.0709158	592.139	±	190.276
7	90576-01G	6.9	0.124568	±	0.0004755	0.002149	±	3.07e-05	0.0001225	±	3.38e-05	0.0015282	±	0.0018397	5.66e-05	±	5.08409e-06	36.4782	±	10.6927	63.5206	0.00125875	99.9506	0.0494074	6.89858	7.78425	63.901	0.0244435	21.3917	99.9685	0.031484	9.67013	89.6146	0.715275	1.37271	0.105687	635.703	±	157.281
8	90576-01H	7.1	0.517073	±	0.002011	0.0089914	±	5.41e-05	0.0013583	±	4.95e-05	0.0142039	±	0.0021334	0.0003279	±	8.06539e-06	13.0613	±	4.29359	86.9374	0.001268	99.8902	0.109775	4.08945	3.98838	83.8346	0.020493	8.06704	99.9858	0.0141642	10.9716	87.8806	1.14776	3.05178	0.367677	252.319	±	77.4243
9	90576-01I	7.2	0.154317	±	0.0006086	0.0027135	±	3.39e-05	6.94e-05	±	3.31e-05	0.0043833	±	0.001711	3.32e-05	±	5.14566e-06	78.75	±	6.87649	21.2487	0.00128219	99.8877	0.112252	24.5151	5.69404	22.0193	0.123776	47.6478	99.9861	0.0138512	33.19	63.3117	3.49823	3.12073	0.0163501	1153.8	±	75.1636
10	90576-01J	7.3	0.195019	±	0.0009782	0.0033263	±	3.47e-05	0.000164	±	3.45e-05	0.0038515	±	0.0017494	2.54e-05	±	5.31005e-06	89.264	±	5.90082	10.7347	0.00124411	99.9195	0.080458	10.3183	1.53835	63.3728	0.0460212	24.7245	99.9807	0.0193299	43.1491	52.8334	4.01752	2.2361	0.0906845	1291.86	±	61.6083
11	90576-01K	7.4	0.285515	±	0.0009411	0.0047572	±	3.59e-05	0.0001281	±	3e-05	0.0080617	±	0.0017722	5.59e-05	±	5.51716e-06	81.5233	±	3.97255	18.4755	0.00121488	99.8822	0.117761	24.0454	4.96261	25.6154	0.123332	45.2533	99.9868	0.0132026	35.6879	60.4908	3.82123	3.27406	0.0200266	1231.08	±	43.9317
12	90576-01L	7.5	0.781218	±	0.0009285	0.0127512	±	5.11e-05	0.0004012	±	2.86e-05	0.0243244	±	0.0019534	0.000125	±	6.67415e-06	87.9107	±	1.7821	12.0881	0.00118994	99.8674	0.132564	22.3286	2.83664	35.9925	0.118819	38.7234	99.9883	0.0117268	46.4158	48.428	5.15617	3.68615	0.0328848	1319.04	±	19.318
13	90576-01M	7.6	0.600608	±	0.0008898	0.0096594	±	3.99e-05	0.0002187	±	3.29e-05	0.0135576	±	0.0019684	9.74e-05	±	5.75503e-06	84.9321	±	2.14469	15.0668	0.00117289	99.9025	0.0975322	25.2744	4.9865	15.786	0.121484	53.8316	99.9841	0.0159438	36.7556	59.5563	3.68808	2.71109	0.0103751	1300.37	±	23.6885
14	90576-01N	7.7	0.57565	±	0.0007063	0.0095161	±	3.91e-05	0.0002284	±	3.16e-05	0.011041	±	0.0019226	7.51e-05	±	6.02553e-06	88.9468	±	2.28696	11.052	0.00120579	99.9194	0.0806214	21.2213	3.35688	24.5377	0.0947294	50.7893	99.9807	0.0192907	41.8005	54.3043	3.89521	2.24065	0.0170931	1317.62	±	24.3364
15	90576-01O	7.8	0.659386	±	0.000984	0.0109777	±	4.74e-05	0.00027	±	3.37e-05	0.0180855	±	0.0019395	6.99e-05	±	5.74957e-06	95.2815	±	1.87565	4.71728	0.00121394	99.8855	0.114484	25.8299	1.38836	23.1043	0.13127	49.5462	99.9864	0.013581	64.6192	28.5253	6.85552	3.18284	0.0164984	1376.56	±	19.3688
16	90576-01P	7.9	0.827525	±	0.0009133	0.0137852	±	4.96e-05	0.0003737	±	4.1e-05	0.0227945	±	0.0020157	0.0001214	±	6.31818e-06	88.9708	±	1.66473	11.028	0.00121466	99.8851	0.114906	23.4929	2.94298	28.4924	0.119538	44.9522	99.9865	0.0135311	46.8375	48.1874	4.97506	3.19459	0.0224252	1311.03	±	17.7384
17	90576-01Q	8	0.510725	±	0.0007874	0.0086582	±	4.3e-05	0.0002093	±	3.12e-05	0.0137222	±	0.0023481	6.66e-05	±	5.36606e-06	91.3709	±	2.53329	8.62785	0.00123619	99.8899	0.110134	25.6111	2.53719	21.3106	0.128484	50.4127	99.9859	0.014118	52.1286	42.4122	5.45926	3.06176	0.0149559	1319.49	±	26.3418
18	90576-01R	8.1	0.411473	±	0.0009549	0.0070914	±	3.97e-05	0.0001476	±	3.26e-05	0.0106493	±	0.0020999	4.1e-05	±	5.51252e-06	95.9305	±	3.00056	4.06825	0.00125678	99.8956	0.104354	28.7123	1.36677	11.2262	0.141392	58.5534	99.9851	0.0149007	66.9457	26.1722	6.88206	2.90092	0.00678325	1349.86	±	30.142
19	90576-01S	8.2	0.488247	±	0.0007061	0.0081688	±	4.71e-05	0.0001794	±	3.49e-05	0.0132988	±	0.0019894	6.66e-05	±	5.32337e-06	90.4993	±	2.42485	9.49947	0.00121997	99.8869	0.11313	28.6982	3.11566	12.5522	0.145273	55.4886	99.9863	0.0137437	50.0675	44.6417	5.29084	3.14516	0.00800338	1322.88	±	25.6797
20	90576-01T	8.3	0.637109	±	0.0008412	0.0106985	±	4.28e-05	0.0003217	±	3.46e-05	0.026128	±	0.0022225	0.000103	±	5.63809e-06	90.738	±	2.00428	9.26079	0.00122375	99.8303	0.169718	27.9597	2.21026	29.1673	0.159174	40.5036	99.9908	0.00915645	56.5586	36.7198	6.72164	4.72105	0.0254777	1322.45	±	21.0212
21	90576-01U	8.4	0.571271	±	0.000722	0.0097336	±	4.06e-05	0.0002337	±	2.49e-05	0.0182598	±	0.0020762	7.8e-05	±	5.41698e-06	91.9735	±	2.12245	8.02525	0.00124219	99.8696	0.130363	28.92	2.36415	17.816	0.153123	50.7467	99.9881	0.011925	56.1196	37.6775	6.20291	3.62489	0.0124211	1321.11	±	21.9509
22	90576-01V	8.5	0.585965	±	0.0007421	0.0097864	±	4.82e-05	0.0002249	±	3.12e-05	0.0201105	±	0.0020714	9.6e-05	±	5.44518e-06	88.3572	±	2.08459	11.6416	0.00121746	99.8572	0.142803	32.228	3.65533	10.9296	0.175244	53.0118	99.9891	0.010885	48.8994	45.5498	5.55073	3.97128	0.00729443	1302.45	±	22.3445
23	90576-01W	8.6	0.520213	±	0.0007537	0.0088584	±	4.29e-05	0.000241	±	2.9e-05	0.0182041	±	0.0022096	7.43e-05	±	5.37131e-06	91.907	±	2.34968	8.09172	0.0012413	99.8572	0.142808	27.2237	2.10493	25.744	0.148034	44.7793	99.9891	0.0108846	57.1911	36.3169	6.49201	3.97141	0.0203403	1321.11	±	24.354
24	90576-01X	8.7	0.667458	±	0.0009139	0.0115631	±	5.67e-05	0.0003655	±	3.15e-05	0.0489749	±	0.0024863	0.0001357	±	6.13469e-06	94.1457	±	2.1748	5.85306	0.00126094	99.7057	0.294348	41.2633	1.28811	18.7032	0.262615	38.4828	99.9947	0.00527313	71.982	18.4545	9.5635	8.19811	0.0171952	1328.97	±	22.1906
25	90576-01Y	8.8	0.537384	±	0.0007933	0.0091897	±	4.58e-05	0.0002526	±	2.71e-05	0.0277782	±	0.0024329	0.0001019	±	5.90015e-06	89.6737	±	2.46573	10.3251	0.00124574	99.7899	0.210066	36.0461	2.64714	16.8003	0.215524	44.2909	99.9926	0.00739489	57.8723	34.9043	7.22343	5.84576	0.0134202	1294.88	±	25.8045
26	90576-01Z	8.8	0.396994	±	0.0006245	0.0067542	±	3.54e-05	0.0001728	±	2.63e-05	0.0130719	±	0.0021656	5.53e-05	±	4.90409e-06	91.8293	±	2.88614	8.16946	0.00124031	99.8655	0.134493	27.7406	2.26186	22.2275	0.148252	47.6218	99.9884	0.0115584	56.1419	37.5948	6.26339	3.73987	0.0165137	1321.06	±	29.8317
27	90576-01AA	8.9	0.434385	±	0.0007121	0.0074213	±	3.82e-05	0.0002645	±	3.02e-05	0.0212604	±	0.0020375	6.96e-05	±	5.28064e-06	93.4247	±	2.61574	6.57404	0.00124469	99.8009	0.199087	26.6542	1.30111	37.7247	0.157532	34.1624	99.9922	0.00780353	65.6047	26.3011	8.0942	5.53962	0.0390693	1333.94	±	26.8171
28	90576-01AB	9	0.414631	±	0.0006837	0.007009	±	3.7e-05	0.0002189	±	3.2e-05	0.0175409	±	0.001943	7.73e-05	±	5.11941e-06	87.2903	±	2.6694	12.7085	0.00123186	99.8261	0.173917	27.4198	2.90097	30.5267	0.157045	38.9955	99.9911	0.00893503	50.2901	43.697	6.01284	4.83805	0.0276964	1280.39	±	28.4349
29	90576-01AC	9.3	0.797681	±	0.0009518	0.0136807	±	5.53e-05	0.0008468	±	3.69e-05	0.247888	±	0.0039774	0.0004955	±	8.89518e-06	100.736	±	4.68017	-0.737722	0.00123623	98.7407	1.25929	79.0567	-0.083748	0.991513	0.573753	19.4618	99.9988	0.00122067	87.5041	-0.761296	13.2572	35.4163	0.00180249	1413	±	45.7155
30	90576-01AD	9.6	1.07113	±	0.0010139	0.0182071	±	5.34e-05	0.0009882	±	3.84e-05	0.186319	±	0.0040173	0.0004422	±	7.76717e-06	91.8157	±	2.86164	8.18304	0.00123203	99.2888	0.7112	52.5978	1.06892	23.6457	0.369538	22.318	99.9978	0.00217336	76.1284	12.7062	11.1654	19.8913	0.0374846	1327.21	±	29.4243
31	90576-01AE	9.9	1.33876	±	0.0011125	0.0232227	±	6.09e-05	0.0016879	±	4.11e-05	0.484391	±	0.0051253	0.0009757	±	1.53e-05	99.4341	±	5.19842	0.564675	0.00124794	98.5503	1.44965	77.0666	0.0539742	5.7751	0.562472	16.5418	99.9989	0.00105833	86.3474	0.49666	13.1559	40.8487	0.0123519	1391.11	±	50.7931
32	90576-01AF	10.2	1.28355	±	0.0011094	0.0223424	±	6.29e-05	0.0011691	±	3.48e-05	0.265935	±	0.0057216	0.0005584	±	8.31711e-06	98.4939	±	3.23985	1.50482	0.00126018	99.1728	0.827224	62.8042	0.199104	13.4285	0.445833	23.1223	99.9981	0.00186635	85.1624	2.21732	12.6203	23.1634	0.0205474	1372.49	±	31.7429
33	90576-01AG	10.5	1.17674	±	0.0010079	0.0203743	±	5.56e-05	0.0009154	±	3.8e-05	0.202967	±	0.0039629	0.0004416	±	7.78885e-06	97.2993	±	2.75842	2.69945	0.00125518	99.3077	0.692337	61.978	0.418195	10.2034	0.434571	26.9659	99.9978	0.002233	83.2093	4.61108	12.1796	19.3601	0.0133871	1364.6	±	27.2757
34	90576-01AH	10.8	0.174266	±	0.0002836	0.0031704	±	2.68e-05	0.0006913	±	2.46e-05	0.24132	±	0.0050806	0.0004481	±	7.68873e-06	121.646	±	20.586	-21.647	0.00125782	94.7099	5.29009	91.1998	-0.657623	3.47448	0.684199	5.29911	99.9997	0.000278717	91.1252	-5.39648	14.2713	155.11	0.0231977	1587.49	±	179.059
35	90576-01AI	11.1	10.3787	±	0.0050013	0.181777	±	0.0001705	0.0101596	±	0.0001208	2.51186	±	0.0309815	0.005117	±	2.41e-05	100.009	±	3.37514	-0.0101997	0.00126627	99.0396	0.960363	67.6597	-0.0012557	10.2382	0.484583	21.6188	99.9984	0.00160546	87.005	-0.0132614	13.0083	26.9277	0.0167552	1382.56	±	32.6259
36	90576-01AJ	11.4	1.48889	±	0.0012056	0.0267231	±	6.58e-05	0.0029069	±	6.27e-05	0.921607	±	0.0074843	0.001711	±	1.32e-05	111.783	±	8.27732	-11.7847	0.00127883	97.6031	2.39685	83.8819	-0.727416	5.2775	0.621397	10.9466	99.9994	0.000633947	92.2999	-6.57363	14.2738	68.1945	0.0170571	1482.91	±	74.9677
37	90576-01AK	11	0.775415	±	0.0008683	0.0138639	±	5e-05	0.0007156	±	3.61e-05	0.205625	±	0.0031605	0.0004032	±	7.19447e-06	102.888	±	4.00015	-2.88964	0.00129174	98.9692	1.03079	78.3378	-0.377347	-1.91605	0.563192	23.3924	99.9985	0.00149471	90.0479	-3.56232	13.5144	28.9229	-0.00289794	1390.77	±	37.8725
38	90576-01AL	12	0.981086	±	0.0008788	0.0176716	±	5.7e-05	0.0021023	±	5.7e-05	0.638186	±	0.0103091	0.0012404	±	1.22e-05	103.365	±	9.11112	-3.36656	0.00128189	97.4901	2.50988	80.2335	-0.189335	9.3631	0.594985	9.99773	99.9994	0.000604696	88.0727	-1.70689	13.6342	71.4933	0.0331342	1402.71	±	86.067
39	90576-01AM	12.5	1.1277	±	0.0011074	0.0206908	±	5.8e-05	0.0033156	±	6.29e-05	1.21278	±	0.0175756	0.0022555	±	1.23e-05	117.216	±	14.5591	-17.2169	0.00128482	95.9263	4.0737	95.863	-0.705699	-3.17746	0.716928	7.30319	99.9996	0.000366589	91.269	-5.51799	14.249	117.93	-0.0153931	1526.59	±	128.079
40	90576-01AN	13	1.15368	±	0.0010086	0.0213233	±	6.69e-05	0.0043708	±	6.02e-05	1.6985	±	0.01355	0.0031054	±	1.72e-05	129.388	±	19.2912	-29.3895	0.00127455	94.464	5.53599	101.477	-0.934871	-6.92636	0.761658	5.62237	99.9997	0.000265646	92.5049	-6.99902	14.4942	162.743	-0.0435856	1639.24	±	160.741
41	90576-01AO	13.5	0.617558	±	0.0006738	0.0113358	±	4.63e-05	0.0022122	±	4.33e-05	0.798779	±	0.0071297	0.0014747	±	1.13e-05	122.66	±	17.1378	-22.6617	0.00127435	95.1027	4.89731	94.4138	-0.762393	-0.304554	0.707713	5.94539	99.9997	0.00030232	91.7295	-6.08333	14.3538	143.001	-0.00181235	1582.47	±	147.406
42	90576-01AP	14	0.614986	±	0.0007311	0.0114351	±	4.23e-05	0.0026774	±	4.56e-05	1.13875	±	0.0128923	0.0020479	±	1.32e-05	144.627	±	24.6074	-44.6278	0.00126342	93.079	6.92104	110.841	-1.23535	-15.2896	0.833623	4.84996	99.9998	0.000209369	93.8554	-8.59087	14.7355	206.487	-0.111537	1771.81	±	192.226
43	90576-01AQ	15	0.787667	±	0.0008391	0.0159758	±	5.69e-05	0.0076596	±	7.83e-05	3.08746	±	0.0162633	0.0056944	±	2.21e-05	162.316	±	50.4631	-62.317	0.00128175	86.5685	13.4315	104.636	-0.772283	-6.85664	0.790044	2.20281	99.9999	0.000100339	91.1575	-5.52556	14.3681	430.86	-0.110127	1888.02	±	364.318
Isotope abundances given in Volts at time-zero (spectrometer sensitivity is ~6.5 x 10-15 moles/Volt), and corrected for 37Ar and 39Ar decay, half lives of 34.95 days and 269 years, respectively.
Isotope sources calculated using the reactor constants in Renne et al. (2005).
Corrections were not made for cosmogenic 40Ar.
Ages calculated using the decay constants and standard calibration of Renne et al. (2011) and calculated relative to Hb3gr fluence monitor (1081 Ma, Renne et al. 2011).
40K/39K isotope abundance used is 0.01167 ± 0.0000205 (Steiger and Jäger 1977).

## Sheet: Laf2
COMPLETE 40Ar/39Ar INCREMENTAL HEATING RESULTS
#	Run ID	Laser Power	40Ar ± 1s			39Ar ± 1s			38Ar ± 1s			37Ar ± 1s			36Ar ± 1s			40Ar* (%) ± 1s			40Aratm (%)	40ArK (%)	39ArK (%)	39ArCa (%)	38Arcos (%)	38Aratm (%)	38ArCl (%)	38ArCa (%)	38ArK (%)	37ArCa (%)	37ArK (%)	36Arcos (%)	36Aratm (%)	36ArCa (%)	Ca/K	Cl/K	Apparent Age ± 1s (Ma)
Lafayette groundmass								J =	0.019915	±	6e-05
1	90576-02A	5	-0.0021052	±	0.0001915	-6.7e-05	±	1.52e-05	-5.83842e-06	±	2.05e-05	0.0048059	±	0.0016444	-7.7555e-06	±	4.12534e-06	-1158.59	±	-386.21	1258.59	0.00243912	104.985	-4.98524	-210.385	54.6909	242.61	-1.61338	14.6983	100	-0.000327851	-102.578	218.999	-16.4215	-131.865	0.583981	#NUM!	±	818.344
2	90576-02B	6	-0.0017889	±	0.0002031	-9.14e-05	±	1.62e-05	-1.84e-05	±	2.03e-05	0.0005464	±	0.0018967	-5.76965e-06	±	4.01423e-06	-484.735	±	-430.538	584.731	0.00374528	100.415	-0.415495	-6.63624	6.85106	93.758	-0.0582057	6.0854	100.004	-0.00376257	-13.707	116.217	-2.50971	-11.4905	0.545101	#NUM!	±	3467.59
3	90576-02C	6.5	0.140059	±	0.000407	0.0024451	±	2.51e-05	0.0001607	±	2.81e-05	0.0156831	±	0.0019311	0.0001183	±	5.06617e-06	5.80268	±	7.89242	94.1961	0.00126873	99.5542	0.445764	28.4144	9.89373	43.0206	0.191274	18.4799	99.9965	0.00347674	24.999	71.488	3.513	12.4342	0.0823634	116.398	±	153.332
4	90576-02D	6.6	0.0589158	±	0.0003266	0.0009537	±	2.19e-05	5.88e-05	±	2.87e-05	0.0058729	±	0.0019983	3.48e-05	±	4.75062e-06	41.4351	±	16.351	58.5637	0.00117663	99.572	0.427967	29.2158	7.07158	43.8138	0.195756	19.703	99.9964	0.00362197	31.972	63.556	4.47202	11.9356	0.0786751	747.497	±	241.995
5	90576-02E	6.7	0.607363	±	0.0023113	0.0094583	±	4.32e-05	0.0004866	±	3.75e-05	0.0226781	±	0.0026535	0.0001953	±	6.64959e-06	64.4271	±	2.73125	35.5718	0.00113491	99.8334	0.166624	16.1182	5.35076	54.7655	0.0913377	23.6743	99.9907	0.00932675	26.0099	70.9133	3.07687	4.63484	0.0818442	1088.04	±	34.7206
6	90576-02F	6.8	0.653522	±	0.0015142	0.0102868	±	4.82e-05	0.0006213	±	3.81e-05	0.0220507	±	0.002017	0.0001459	±	6.87553e-06	78.7094	±	2.22303	21.2895	0.00114735	99.851	0.148964	12.6419	2.69871	64.4205	0.0695555	20.1693	99.9896	0.0104342	34.8667	61.1286	4.00468	4.14287	0.113003	1250.89	±	25.7652
7	90576-02G	6.9	0.801732	±	0.0014124	0.0129679	±	4.97e-05	0.0004016	±	3.19e-05	0.0161803	±	0.0021837	0.0001277	±	6.05107e-06	84.6787	±	1.81637	15.3201	0.00117974	99.9133	0.0867009	17.1771	3.68578	39.6978	0.0789534	39.3604	99.9821	0.0179372	34.987	61.6559	3.3571	2.40976	0.0356833	1292.22	±	20.054
8	90576-02H	7	0.500338	±	0.0011142	0.0081857	±	4.3e-05	0.0002326	±	2.97e-05	0.0147943	±	0.002156	6.36e-05	±	5.39609e-06	92.5756	±	2.44441	7.42316	0.00119281	99.8744	0.125594	23.8117	1.92431	31.2588	0.124648	42.8805	99.9876	0.0123784	56.4021	37.4344	6.16353	3.49211	0.0257911	1365.75	±	25.7203
9	90576-02I	7.1	1.02905	±	0.0017094	0.0167145	±	9.66e-05	0.0004255	±	3.57e-05	0.028686	±	0.002159	0.0001559	±	5.96805e-06	88.2347	±	1.40313	11.7641	0.0011843	99.8807	0.119263	25.6539	3.42869	22.9184	0.13212	47.8669	99.987	0.0130363	45.3481	49.7765	4.87543	3.31586	0.0169398	1326.95	±	15.8329
10	90576-02J	7.2	0.741831	±	0.0016114	0.0121129	±	8.12e-05	0.0003113	±	3.18e-05	0.0218334	±	0.0019606	9.31e-05	±	7.33615e-06	92.7792	±	1.9592	7.21957	0.00119048	99.8747	0.125258	26.279	2.07334	24.0986	0.13745	47.4116	99.9876	0.0124117	56.9103	36.8758	6.21389	3.48274	0.0179832	1369.74	±	21.1793
11	90576-02K	7.3	0.867898	±	0.0009832	0.0143793	±	8.46e-05	0.0003901	±	3.53e-05	0.0246426	±	0.002141	0.0001134	±	8.12362e-06	91.7108	±	1.85292	8.288	0.00120802	99.8809	0.11909	24.0488	2.22216	28.6889	0.123797	44.9163	99.9869	0.0130551	53.5809	40.6612	5.75788	3.31106	0.0225979	1344.72	±	19.9355
12	90576-02L	7.4	1.35003	±	0.0009441	0.022251	±	0.0001121	0.000571	±	3.2e-05	0.0377587	±	0.002145	0.0001764	±	8.77031e-06	91.5636	±	1.33391	8.43517	0.00120175	99.8821	0.117922	25.2548	2.40345	24.7267	0.129592	47.4855	99.9868	0.0131846	52.946	41.3823	5.67162	3.27854	0.0184231	1348.13	±	14.6349
13	90576-02M	7.5	1.47628	±	0.0012143	0.0245655	±	0.0001116	0.0006236	±	4.69e-05	0.0546665	±	0.0024317	0.0002271	±	9.94959e-06	90.7239	±	1.40856	9.27487	0.00121286	99.8454	0.154645	30.9107	2.64607	18.2862	0.171802	47.9852	99.9899	0.0100503	54.9731	38.6486	6.37832	4.30112	0.0134826	1330.71	±	15.2202
14	90576-02N	7.6	1.30015	±	0.0009548	0.0216282	±	9.75e-05	0.0005525	±	3.53e-05	0.0475041	±	0.0023987	0.0002091	±	8.62997e-06	89.4827	±	1.43618	10.5161	0.00121251	99.8474	0.152634	30.424	2.98229	18.7399	0.168504	47.6853	99.9898	0.010183	52.0652	41.915	6.01975	4.24509	0.013904	1318.04	±	15.5886
15	90576-02O	7.7	0.975955	±	0.001111	0.0162637	±	9.53e-05	0.0004601	±	3.23e-05	0.034681	±	0.0021417	0.0001573	±	8.29968e-06	89.1315	±	1.71773	10.8673	0.0012147	99.8518	0.148187	26.8877	2.778	27.1257	0.147724	43.0609	99.9895	0.0104889	50.9367	43.2213	5.84202	4.12124	0.0222872	1312.69	±	18.7716
16	90576-02P	7.8	0.850333	±	0.0008737	0.0140796	±	9.43e-05	0.0004395	±	3.6e-05	0.0401104	±	0.0020376	0.000132	±	8.6868e-06	93.5557	±	1.96405	6.44308	0.00120632	99.802	0.197978	30.3008	1.5023	29.0121	0.178863	39.0059	99.9922	0.00784731	65.3419	26.6063	8.05183	5.50872	0.0263152	1365.05	±	21.097
17	90576-02Q	7.9	1.07209	±	0.0011118	0.0180861	±	0.0001113	0.0005917	±	4e-05	0.0747399	±	0.0023189	0.0002477	±	9.78763e-06	88.6153	±	1.94715	11.3834	0.00122797	99.7128	0.28719	39.0538	2.48562	21.0292	0.247562	37.1838	99.9946	0.00540495	60.4215	31.583	7.99556	7.99817	0.0200091	1297.19	±	21.107
18	90576-02R	8	0.717331	±	0.000996	0.0121424	±	7.7e-05	0.0004622	±	2.77e-05	0.039738	±	0.0025016	0.0001445	±	8.36479e-06	88.9142	±	2.36151	11.0845	0.00123287	99.7726	0.227435	27.7266	2.0732	38.0541	0.168501	31.9776	99.9932	0.00682901	57.4397	35.2732	7.28709	6.33021	0.042103	1296.61	±	25.2416
19	90576-02S	8.1	0.771093	±	0.0016096	0.0132439	±	8.48e-05	0.0005905	±	3.7e-05	0.091306	±	0.0026223	0.0002456	±	7.07217e-06	89.7674	±	2.46524	10.2313	0.0012478	99.5209	0.479131	44.6681	1.61009	26.1873	0.303055	27.2314	99.9968	0.00323354	69.5571	20.5913	9.85151	13.3694	0.0340235	1294.32	±	26.001
20	90576-02T	8.2	0.678952	±	0.000881	0.0115354	±	7.64e-05	0.0004957	±	3.46e-05	0.0674147	±	0.0025369	0.0001849	±	8.78474e-06	91.148	±	2.74168	8.85077	0.00123523	99.5938	0.406153	40.0297	1.46095	29.9676	0.266548	28.2752	99.9962	0.00381732	69.5051	20.8333	9.66155	11.3248	0.0374976	1317.93	±	28.8032
21	90576-02U	8.3	0.63391	±	0.0007605	0.0109319	±	4.13e-05	0.0004458	±	3.32e-05	0.048296	±	0.0030367	0.00016	±	7.73046e-06	87.3212	±	2.71722	12.6775	0.00125503	99.693	0.307028	33.1405	2.17247	34.6497	0.212327	29.825	99.9949	0.00505472	59.8043	32.1971	7.99862	8.55237	0.0411034	1263.69	±	28.4822
22	90576-02V	8.4	0.409752	±	0.000661	0.0067551	±	6.36e-05	0.0002488	±	2.56e-05	0.0343168	±	0.002407	9.28e-05	±	7.68191e-06	93.4926	±	3.65997	6.50623	0.00119922	99.6469	0.353054	41.3411	1.29132	24.0903	0.270329	33.0069	99.9956	0.00439377	71.7856	18.4153	9.79909	9.83896	0.0258223	1370.07	±	38.6546
23	90576-02W	8.5	0.447537	±	0.0007205	0.0078619	±	3.54e-05	0.0003763	±	2.75e-05	0.05691	±	0.0025671	0.0001217	±	7.96954e-06	99.7637	±	3.717	0.235043	0.00127594	99.4969	0.503075	43.4704	0.033688	30.8387	0.296413	25.3608	99.9969	0.00307891	87.0542	0.554066	12.3917	14.0409	0.0430221	1372.86	±	36.07
24	90576-02X	8.6	0.413776	±	0.0006831	0.007109	±	5.85e-05	0.0002792	±	2.7e-05	0.0389795	±	0.0022645	0.000104	±	6.09463e-06	92.9232	±	3.16481	7.07554	0.00124942	99.6189	0.381061	41.4223	1.2637	26.095	0.273627	30.9453	99.9959	0.0040697	72.0227	18.0454	9.93187	10.6225	0.0298346	1325.31	±	32.8849
25	90576-02Y	8.7	0.618022	±	0.000979	0.0108989	±	5.19e-05	0.0007749	±	3.34e-05	0.182426	±	0.0035127	0.0003686	±	1.05e-05	99.9868	±	4.99574	0.011907	0.00127239	98.8367	1.16328	63.8024	0.00114444	18.7754	0.461415	16.9596	99.9987	0.0013227	86.8721	0.0127975	13.1151	32.6842	0.0391681	1377.7	±	48.3743
26	90576-02Z	8.8	0.384422	±	0.0006703	0.0067291	±	3.9e-05	0.0003406	±	2.85e-05	0.0548319	±	0.0023329	0.0001258	±	7.78476e-06	95.8025	±	4.13706	4.19627	0.00127059	99.4337	0.566304	45.753	0.570768	29.3941	0.315524	23.9666	99.9973	0.00273341	80.23	8.21989	11.5501	15.8157	0.0433923	1338.23	±	41.1699
27	90576-02AA	8.8	0.260815	±	0.0005012	0.0044984	±	3.02e-05	0.0001951	±	2.84e-05	0.0306036	±	0.0023036	6.67e-05	±	5.13875e-06	99.2506	±	4.36951	0.748172	0.00125311	99.5272	0.472808	45.3778	0.120534	26.1978	0.307438	27.9964	99.9967	0.00327699	85.9662	1.87536	12.1585	13.1922	0.033107	1385.31	±	43.0624
28	90576-02AB	8.9	0.241378	±	0.0004803	0.0041784	±	4.59e-05	0.0001576	±	2.69e-05	0.0192717	±	0.0034582	8.23e-05	±	6.86414e-06	74.6253	±	6.4548	25.3735	0.00125962	99.6795	0.320534	37.1627	4.68334	25.6725	0.239662	32.2418	99.9952	0.0048411	46.091	47.7039	6.20505	8.92978	0.0281713	1123.35	±	72.9392
29	90576-02AC	9	0.301563	±	0.0005785	0.005237	±	5.17e-05	0.0002271	±	4.99e-05	0.0544651	±	0.002331	0.0001408	±	4.95251e-06	85.4751	±	4.22181	14.5236	0.00125857	99.2772	0.722789	66.8261	2.32418	2.44944	0.470054	27.9303	99.9979	0.00213827	69.8093	19.94	10.2507	20.2178	0.00310277	1241.83	±	45.2283
30	90576-02AD	9.3	0.407054	±	0.0005403	0.0072529	±	3.49e-05	0.0009919	±	3.29e-05	0.302939	±	0.0102694	0.0006116	±	8.21931e-06	94.5236	±	12.1979	5.47511	0.00126296	97.0971	2.90286	80.4821	0.270776	9.98664	0.598607	8.66184	99.9995	0.000520727	84.5381	2.33589	13.126	83.0219	0.0407913	1331.23	±	121.676
31	90576-02AE	9.6	0.501798	±	0.0006602	0.0090797	±	4.38e-05	0.0009054	±	4.74e-05	0.271342	±	0.0050099	0.0005504	±	8.11622e-06	96.304	±	7.96127	3.69469	0.00129345	97.923	2.07695	79.5722	0.246774	7.61314	0.587393	11.9805	99.9993	0.000733986	84.7766	2.15926	13.0641	58.8999	0.0224826	1326.34	±	77.8259
32	90576-02AF	9.9	0.554529	±	0.0006501	0.0102824	±	4.19e-05	0.0022451	±	4.46e-05	0.853817	±	0.0075735	0.0015065	±	1.23e-05	145.914	±	20.4152	-45.9155	0.00127549	94.229	5.77104	99.2692	-1.36673	-3.91291	0.745391	5.26506	99.9997	0.000254192	95.8151	-10.834	15.019	170.076	-0.0262939	1771.08	±	158.062
33	90576-02AG	10.2	0.531202	±	0.0012043	0.0099651	±	4.71e-05	0.0025319	±	6.11e-05	0.877242	±	0.0104277	0.0016411	±	1.82e-05	121.616	±	22.4397	-21.6178	0.00128566	93.8818	6.11817	90.39	-0.546584	4.96962	0.679091	4.50792	99.9998	0.000238887	90.3201	-4.4855	14.1654	180.972	0.0390036	1564.21	±	193.226
34	90576-02AH	10.5	0.420146	±	0.0006362	0.0077646	±	3.81e-05	0.0015348	±	4.36e-05	0.538277	±	0.0067226	0.000986	±	1.52e-05	125.391	±	17.9242	-25.3919	0.00128409	95.182	4.81803	91.7209	-0.837677	2.55474	0.687398	5.87465	99.9997	0.00030755	92.4689	-6.93575	14.4668	140.568	0.0153859	1597.7	±	151.741
35	90576-02AI	10.8	0.41927	±	0.0007057	0.0080137	±	4.11e-05	0.0022193	±	4.76e-05	0.86016	±	0.0100202	0.0015456	±	1.22e-05	149.611	±	27.4159	-49.6121	0.0012912	92.5401	7.45985	100.948	-1.12953	-4.65482	0.759659	4.07668	99.9998	0.000193122	93.8792	-8.62699	14.7478	223.858	-0.0403974	1785.55	±	208.006
36	90576-02AJ	11.1	0.401659	±	0.0012038	0.0077957	±	4.25e-05	0.0031886	±	6.34e-05	1.14958	±	0.0249396	0.0022957	±	2.32e-05	78.3299	±	41.0694	21.6689	0.00127163	89.7513	10.2487	93.7106	0.328948	2.57678	0.706636	2.67704	99.9999	0.000136334	84.2997	2.43027	13.27	317.104	0.034055	1156.29	±	447.918
37	90576-02AK	11.4	0.332074	±	0.0005405	0.0063713	±	3.85e-05	0.0024365	±	5.27e-05	0.945377	±	0.0088257	0.0017545	±	1.92e-05	141.09	±	38.099	-41.0909	0.00125617	89.6876	10.3124	100.849	-0.674913	-3.79602	0.760491	2.86124	99.9999	0.000135395	90.7065	-4.98544	14.279	319.302	-0.0469388	1750.43	±	302.91
38	90576-02AL	11	0.139679	±	0.0003089	0.0026242	±	2.56e-05	0.0005389	±	3.33e-05	0.202764	±	0.0041105	0.0003824	±	7.62158e-06	116.047	±	21.9278	-16.0485	0.00129782	94.63	5.37003	98.2835	-0.501294	-4.14146	0.737457	5.62182	99.9997	0.000274337	89.7064	-3.75773	14.0513	157.587	-0.0260636	1505.98	±	193.388
39	90576-02AM	12	0.164489	±	0.0003338	0.0032098	±	2.79e-05	0.0010447	±	3.72e-05	0.432752	±	0.0058153	0.000798	±	9.97112e-06	143.217	±	36.1552	-43.2186	0.00129103	90.6299	9.37012	107.725	-0.820065	-11.1145	0.811901	3.39717	99.9998	0.000150577	91.3397	-5.71056	14.3708	287.109	-0.115752	1736.55	±	281.961
40	90576-02AN	12.5	0.135241	±	0.0003222	0.0027525	±	2.55e-05	0.0015288	±	4.1e-05	0.603144	±	0.0079909	0.0011273	±	1.13e-05	153.157	±	60.3557	-53.158	0.00125947	84.7708	15.2292	102.363	-0.56671	-4.4314	0.773261	1.86201	99.9999	8.66563e-05	89.9096	-4.08803	14.1784	498.89	-0.0842009	1840.85	±	455.3
41	90576-02AO	13	0.227623	±	0.0007151	0.004804	±	3.33e-05	0.0030876	±	4.63e-05	1.25555	±	0.0153117	0.0023245	±	1.62e-05	180.081	±	73.3137	-80.0824	0.00126082	81.8358	18.1642	105.445	-0.711484	-7.08406	0.79702	1.55341	99.9999	7.01391e-05	90.7132	-5.02689	14.3136	616.375	-0.161345	2031.95	±	496.964
42	90576-02AP	13.5	0.137903	±	0.0003898	0.0028169	±	2.6e-05	0.0017978	±	5.67e-05	0.742246	±	0.0070441	0.0013705	±	1.13e-05	182.268	±	71.0269	-82.2696	0.00121808	81.6869	18.3131	107.055	-0.760509	-8.66567	0.809212	1.5615	99.9999	6.94423e-05	90.9544	-5.30651	14.3521	622.56	-0.196344	2089.21	±	482.924
43	90576-02AQ	14	0.191815	±	0.0002858	0.0039583	±	2.54e-05	0.0023301	±	5.4e-05	0.919981	±	0.0134025	0.0017135	±	1.62e-05	161.764	±	65.1805	-61.7657	0.00126309	83.847	16.153	102.42	-0.612758	-4.31871	0.773855	1.73773	99.9999	8.081e-05	90.2043	-4.43222	14.2279	534.983	-0.0879288	1901.23	±	474.094
44	90576-02AR	15	0.444205	±	0.0006389	0.0101484	±	4.35e-05	0.0091596	±	0.0001112	3.92138	±	0.0278485	0.0071651	±	2.72e-05	259.169	±	113.966	-159.17	0.00121989	73.1449	26.8551	110.903	-0.930252	-11.8001	0.83911	0.988701	100	4.24024e-05	91.8224	-6.32553	14.5032	1019.56	-0.422259	2546.26	±	600.742
Isotope abundances given in Volts at time-zero (spectrometer sensitivity is ~6.5 x 10-15 moles/Volt), and corrected for 37Ar and 39Ar decay, half lives of 34.95 days and 269 years, respectively.
Isotope sources calculated using the reactor constants in Renne et al. (2005).
Corrections were not made for cosmogenic 40Ar.
Ages calculated using the decay constants and standard calibration of Renne et al. (2011) and calculated relative to Hb3gr fluence monitor (1081 Ma, Renne et al. 2011).
40K/39K isotope abundance used is 0.01167 ± 0.0000205 (Steiger and Jäger 1977).

## Sheet: Laf3
COMPLETE 40Ar/39Ar INCREMENTAL HEATING RESULTS
#	Run ID	Laser Power	40Ar ± 1s			39Ar ± 1s			38Ar ± 1s			37Ar ± 1s			36Ar ± 1s			40Ar* (%) ± 1s			40Aratm (%)	40ArK (%)	39ArK (%)	39ArCa (%)	38Arcos (%)	38Aratm (%)	38ArCl (%)	38ArCa (%)	38ArK (%)	37ArCa (%)	37ArK (%)	36Arcos (%)	36Aratm (%)	36ArCa (%)	Ca/K	Cl/K	Apparent Age ± 1s (Ma)
Lafayette groundmass								J =	0.019915	±	6e-05
1	90576-03A	5	-0.000953	±	0.0001708	-6.6e-05	±	1.69e-05	-2.13e-05	±	2.26e-05	-0.0012783	±	0.0020334	-1.48e-05	±	4.40105e-06	-1902.23	±	-992.841	2002.22	0.00498756	98.6539	1.34607	16.1628	10.7959	69.1942	0.117626	3.7294	99.9989	0.00114097	15.0657	82.6455	2.28882	37.8902	0.656431	#NUM!	±	1224.56
2	90576-03B	6	-0.0012812	±	0.0001805	-4.41e-05	±	1.63e-05	-1.2e-05	±	2.09e-05	0.000156	±	0.0021384	-6.51338e-06	±	4.28478e-06	-722.63	±	-633.487	822.627	0.0025189	100.246	-0.245866	-2.59097	10.5845	87.5374	-0.0254816	4.49452	100.006	-0.00634788	-3.09165	103.726	-0.634734	-6.8109	0.689077	#NUM!	±	2238.41
3	90576-03C	6.5	0.203847	±	0.0010083	0.0031877	±	2.84e-05	0.0002513	±	2.78e-05	0.0158681	±	0.0020856	0.0001268	±	6.1658e-06	29.8192	±	6.30911	70.1796	0.00113761	99.6541	0.34595	18.9794	6.8605	58.6143	0.123757	15.422	99.9955	0.00448431	24.3618	72.3221	3.31613	9.6403	0.134469	583.782	±	105.625
4	90576-03D	6.6	0.337561	±	0.0012133	0.0057248	±	3.86e-05	0.0002373	±	3.1e-05	0.0125448	±	0.0021138	0.000114	±	6.23442e-06	62.1458	±	3.97043	37.853	0.00123614	99.8477	0.15228	18.7178	6.48915	45.3021	0.103604	29.3874	99.9898	0.0102066	25.2349	71.8493	2.91582	4.23524	0.05454	992.007	±	48.9751
5	90576-03E	6.7	0.594496	±	0.0015147	0.0099106	±	4.59e-05	0.0004446	±	3.02e-05	0.0173605	±	0.0023022	0.0001523	±	6.36822e-06	72.3956	±	2.51912	27.6032	0.00121547	99.8783	0.121728	14.762	4.44808	53.5514	0.0765232	27.162	99.9872	0.0127719	27.9105	69.0692	3.02032	3.38449	0.0697537	1127.83	±	29.3788
6	90576-03F	6.8	0.706092	±	0.0015198	0.0115878	±	5.07e-05	0.000331	±	3e-05	0.0157304	±	0.0023136	0.0001256	±	6.2264e-06	82.4613	±	2.10767	17.5375	0.00119689	99.9057	0.0943305	19.6164	4.50853	33.1119	0.0931314	42.67	99.9835	0.0164854	33.4819	63.1997	3.31837	2.62201	0.0274549	1254.78	±	23.3828
7	90576-03G	6.9	0.792841	±	0.0015203	0.0129607	±	4.9e-05	0.0003697	±	2.86e-05	0.0164651	±	0.0025324	0.0001169	±	6.49873e-06	86.7387	±	1.99717	13.2601	0.00119229	99.9117	0.0882763	18.8544	3.42703	34.8991	0.0872759	42.7322	99.9824	0.0176169	38.6188	57.6493	3.73181	2.45358	0.0288946	1304.68	±	21.6136
8	90576-03H	7	0.50802	±	0.0013181	0.0084012	±	4.34e-05	0.0001515	±	3.03e-05	0.0122118	±	0.0025287	5.73e-05	±	5.62131e-06	93.1743	±	2.7443	6.82446	0.00120599	99.899	0.101008	32.4497	2.75784	-2.95043	0.157963	67.5849	99.9846	0.0153947	55.5676	38.7855	5.64682	2.80781	-0.00154452	1361.4	±	28.497
9	90576-03I	7.1	1.41639	±	0.0012155	0.0233424	±	5.77e-05	0.0005827	±	3.72e-05	0.0321236	±	0.0023258	0.0002119	±	6.72275e-06	87.0083	±	1.20361	12.9905	0.00120191	99.9044	0.0956297	22.64	3.80537	24.6213	0.108035	48.8253	99.9837	0.0162612	40.3221	55.6612	4.01669	2.65816	0.0178412	1300.11	±	13.0053
10	90576-03J	7.2	0.834199	±	0.0017093	0.0138321	±	4.78e-05	0.0003573	±	2.69e-05	0.0160786	±	0.0021508	0.000107	±	6.04734e-06	89.3283	±	1.72788	10.6705	0.00120946	99.9192	0.0807721	19.7398	3.00231	29.9782	0.0881836	47.1915	99.9807	0.0192547	42.6918	53.3269	3.98132	2.24484	0.022475	1318.79	±	18.2967
11	90576-03K	7.3	0.786262	±	0.0007697	0.013191	±	4.88e-05	0.0002849	±	2.93e-05	0.0135545	±	0.0021327	0.0001108	±	5.72629e-06	86.7801	±	1.81552	13.2187	0.00122384	99.9286	0.0713996	21.9947	4.3964	17.0695	0.0932293	56.4462	99.9782	0.0217837	36.6288	60.1301	3.24112	1.98417	0.010699	1281	±	19.4795
12	90576-03L	7.4	0.610951	±	0.0014114	0.0102772	±	4.16e-05	0.0002493	±	3.13e-05	0.0105552	±	0.0022719	8.6e-05	±	5.83722e-06	86.8252	±	2.39325	13.1736	0.0012271	99.9286	0.0713644	19.5778	3.89064	26.1909	0.082967	50.2577	99.9782	0.0217945	36.7571	59.9911	3.25177	1.98319	0.0184377	1279.04	±	25.4558
13	90576-03M	7.5	1.16377	±	0.0011173	0.019335	±	5.72e-05	0.0004831	±	3.18e-05	0.0338481	±	0.0024465	0.0001632	±	6.44812e-06	90.4363	±	1.34958	9.56254	0.00121136	99.8783	0.121652	26.4933	2.7761	21.8249	0.137309	48.7684	99.9872	0.01278	50.7932	43.7113	5.49547	3.38237	0.0158333	1328.89	±	14.2894
14	90576-03N	7.6	1.0497	±	0.0009207	0.0177571	±	6.1e-05	0.0005079	±	3.09e-05	0.0372158	±	0.0023269	0.0001489	±	6.19387e-06	92.1749	±	1.40683	7.82391	0.00123309	99.8544	0.145644	26.2631	1.9487	29.0533	0.143601	42.5913	99.9893	0.0106723	58.0207	35.3567	6.62266	4.05041	0.0241342	1330.07	±	14.7098
15	90576-03O	7.7	0.743383	±	0.0007982	0.0125743	±	4.71e-05	0.0003164	±	2.91e-05	0.0201034	±	0.002263	8.78e-05	±	5.57169e-06	93.3338	±	1.77826	6.665	0.00123342	99.8889	0.111099	24.7473	1.88716	24.8099	0.124517	48.4311	99.986	0.0139952	57.7594	36.1737	6.06681	3.08862	0.0181242	1341.62	±	18.3646
16	90576-03P	7.8	0.828112	±	0.0008631	0.0140708	±	5.05e-05	0.0003854	±	3.21e-05	0.0273716	±	0.0022305	0.0001062	±	5.70496e-06	93.587	±	1.60764	6.41172	0.0012387	99.8648	0.135181	26.005	1.66029	27.7141	0.139186	44.4815	99.9885	0.0114995	61.1218	32.049	6.82923	3.75903	0.0220434	1340.14	±	16.5814
17	90576-03Q	7.9	1.37115	±	0.0011083	0.0232427	±	6.58e-05	0.0007939	±	3.36e-05	0.0810535	±	0.0027381	0.0002954	±	7.02e-06	87.8598	±	1.45123	12.1389	0.00123445	99.7577	0.24235	32.5231	2.52657	29.1194	0.200094	35.6309	99.9936	0.0064078	56.6108	36.1184	7.27075	6.74634	0.0289143	1284.43	±	15.3927
18	90576-03R	8	0.751844	±	0.0015058	0.0128048	±	5.18e-05	0.0004066	±	3.26e-05	0.0357315	±	0.0021922	0.0001236	±	6.13984e-06	92.3339	±	1.83175	7.66489	0.00124087	99.8061	0.193923	29.312	1.70805	30.4615	0.172229	38.3462	99.992	0.00801173	62.4522	29.8876	7.66027	5.39565	0.0281052	1325.78	±	18.9321
19	90576-03S	8.1	0.833644	±	0.0008027	0.0142193	±	5.43e-05	0.0004809	±	2.63e-05	0.048519	±	0.0025125	0.0001789	±	6.39322e-06	87.7372	±	1.85289	12.2616	0.00124219	99.7629	0.237132	32.2731	2.56157	28.9801	0.197736	35.9875	99.9935	0.00654913	56.1872	36.6263	7.18652	6.60075	0.0284908	1277.41	±	19.6414
20	90576-03T	8.2	0.745304	±	0.0014072	0.0128253	±	5.44e-05	0.0004645	±	2.45e-05	0.0692237	±	0.0031358	0.0001997	±	6.48762e-06	89.9386	±	2.34462	10.0602	0.00125148	99.6249	0.375106	44.3067	1.9453	19.8969	0.292084	33.559	99.9959	0.00413455	66.7467	24.0678	9.18554	10.4558	0.0209765	1293.35	±	24.3418
21	90576-03U	8.3	0.824803	±	0.0009286	0.0143725	±	5.17e-05	0.0006906	±	2.43e-05	0.132495	±	0.0029431	0.0003011	±	6.84148e-06	95.3336	±	2.77266	4.66513	0.0012639	99.3593	0.640681	53.9537	0.671461	19.7713	0.376027	25.2275	99.9976	0.00241429	80.1475	8.19179	11.6607	17.9063	0.027728	1338.58	±	27.6973
22	90576-03V	8.4	0.657521	±	0.0008776	0.0114668	±	4.17e-05	0.0005349	±	2.9e-05	0.0751169	±	0.0027704	0.0001971	±	5.72895e-06	91.4867	±	2.48603	8.51208	0.00126728	99.5447	0.455266	40.7916	1.26097	31.6378	0.275237	26.0344	99.9966	0.00340385	71.6983	18.2026	10.0991	12.7005	0.0429949	1297.53	±	25.3574
23	90576-03W	8.5	0.631135	±	0.0013046	0.0111465	±	4.71e-05	0.0005871	±	3.41e-05	0.129844	±	0.0031449	0.00027	±	6.29464e-06	99.2371	±	3.5035	0.761621	0.00127882	99.1904	0.809582	61.1474	0.0986692	15.3454	0.43347	22.975	99.9981	0.00190736	86.115	1.14123	12.7437	22.6654	0.0236309	1365.62	±	34.0284
24	90576-03X	8.6	0.559353	±	0.0007384	0.0098178	±	4.41e-05	0.0005068	±	3.28e-05	0.11923	±	0.0034164	0.0002587	±	6.10599e-06	96.0477	±	3.77208	3.95103	0.00127049	99.156	0.844013	64.8729	0.525525	10.7059	0.461103	23.4345	99.9982	0.00182892	82.3107	5.47615	12.2132	23.6376	0.0161631	1340.73	±	37.4079
25	90576-03Y	8.7	0.585479	±	0.0013055	0.0103214	±	4.05e-05	0.0005704	±	3.64e-05	0.126482	±	0.0034404	0.00029	±	6.4352e-06	91.8132	±	3.79259	8.18554	0.00127596	99.1483	0.851661	61.1109	1.01254	15.554	0.434607	21.8879	99.9982	0.00181236	77.849	10.5934	11.5576	23.8536	0.0251418	1294.52	±	38.3069
26	90576-03Z	8.8	0.454502	±	0.0010087	0.00805	±	4.19e-05	0.0003734	±	3.39e-05	0.0720537	±	0.0027091	0.0001855	±	6.27523e-06	88.0365	±	3.55739	11.9622	0.00128491	99.3779	0.622063	54.3975	1.75472	17.3316	0.378205	26.1379	99.9975	0.00248701	70.9189	18.788	10.2931	17.3827	0.0234599	1249.77	±	36.7114
27	90576-03AA	8.8	0.342679	±	0.0005753	0.0060574	±	3.72e-05	0.0002266	±	3.06e-05	0.0420603	±	0.0029641	0.0001161	±	5.06653e-06	88.0173	±	3.88103	11.9814	0.00128416	99.5174	0.482566	53.5803	2.18357	11.417	0.363793	32.4553	99.9968	0.00321041	67.7307	22.6693	9.60002	13.4657	0.0124459	1250.1	±	40.1537
28	90576-03AB	8.9	0.39695	±	0.000621	0.00693	±	3.57e-05	0.0004829	±	2.78e-05	0.1184	±	0.0030411	0.0002553	±	6.07224e-06	93.5953	±	5.09758	6.40346	0.00125931	98.8126	1.1874	66.3867	0.634346	15.1983	0.480556	17.3001	99.9987	0.00129552	81.3281	6.38227	12.2897	33.37	0.0310816	1324.67	±	51.3587
29	90576-03AC	9	0.375841	±	0.0005993	0.0067185	±	3.64e-05	0.0004341	±	3.15e-05	0.121708	±	0.0034118	0.0002493	±	7.0411e-06	98.2702	±	5.76911	1.72849	0.00128851	98.741	1.25901	75.718	0.18035	4.9081	0.549518	18.644	99.9988	0.00122095	85.3924	1.67042	12.9372	35.4081	0.0093139	1349.06	±	56.0366
30	90576-03AD	9.3	0.605837	±	0.0007565	0.0108371	±	4.59e-05	0.0015369	±	4.23e-05	0.466439	±	0.0074351	0.0009412	±	9.72578e-06	94.3448	±	10.7815	5.6539	0.00126675	97.0087	2.99133	79.9313	0.268591	10.8601	0.594844	8.34522	99.9995	0.000504867	84.5343	2.33291	13.1328	85.6301	0.0460419	1326.63	±	107.495
31	90576-03AE	9.6	0.617223	±	0.0006575	0.0111882	±	4.52e-05	0.0015765	±	3.77e-05	0.506978	±	0.0053399	0.0009933	±	1.04e-05	101.271	±	11.1714	-1.27231	0.00128158	96.8507	3.14928	84.6174	-0.0600307	6.42682	0.630303	8.3855	99.9995	0.000478765	86.9813	-0.506791	13.5255	90.2987	0.0271159	1383.07	±	106.709
32	90576-03AF	9.9	0.716311	±	0.0015044	0.0132824	±	4.9e-05	0.0028991	±	6.04e-05	1.04409	±	0.0138211	0.0019261	±	1.34e-05	125.406	±	19.6175	-25.4074	0.00127967	94.5368	5.46315	94.0578	-0.756539	0.708694	0.705875	5.28414	99.9997	0.000269395	91.6921	-6.05701	14.3649	160.478	0.00474507	1601.5	±	166.239
33	90576-03AG	10.2	0.602491	±	0.0007488	0.0111262	±	4.25e-05	0.0020528	±	4.89e-05	0.678418	±	0.0094532	0.0013401	±	1.25e-05	97.5688	±	15.4143	2.42993	0.00129096	95.7623	4.23773	86.5668	0.0859471	6.36727	0.647746	6.3322	99.9996	0.000351797	85.8843	0.700298	13.4154	122.889	0.035576	1340.47	±	149.595
34	90576-03AH	10.5	0.397958	±	0.0006876	0.0073695	±	3.52e-05	0.0017009	±	4.16e-05	0.580038	±	0.0087394	0.0011009	±	1.01e-05	113.302	±	19.9797	-13.303	0.00127789	94.5298	5.47018	89.0622	-0.375095	5.64772	0.668394	4.99675	99.9997	0.000269029	89.1204	-3.08258	13.9622	160.696	0.0399892	1497.35	±	179.622
35	90576-03AI	10.8	0.289437	±	0.0005578	0.005379	±	3.53e-05	0.0012069	±	5.07e-05	0.462228	±	0.0083139	0.0008695	±	1.04e-05	118.417	±	22.5552	-18.4188	0.00127563	94.0277	5.97226	99.9376	-0.532325	-5.26861	0.750654	5.11265	99.9998	0.000245103	89.8428	-3.93026	14.0874	176.382	-0.0364592	1544.58	±	197.949
36	90576-03AJ	11.1	0.258885	±	0.0005275	0.0048351	±	3.19e-05	0.001674	±	4.16e-05	0.620765	±	0.0073314	0.0011444	±	1.13e-05	139.758	±	32.2781	-39.7588	0.00124174	91.0771	8.9229	96.4657	-0.740997	0.339147	0.726821	3.20936	99.9998	0.000158904	91.3909	-5.76549	14.3746	272.063	0.00373875	1752.74	±	259.322
37	90576-03AK	11.4	0.317076	±	0.001004	0.0061241	±	3.34e-05	0.0020048	±	4.63e-05	0.760761	±	0.0105959	0.0014183	±	1.13e-05	132.134	±	32.3996	-32.1348	0.00128821	91.3664	8.63356	98.7345	-0.612495	-2.2708	0.743759	3.40501	99.9998	0.000164751	90.3909	-4.60519	14.2143	262.407	-0.0235949	1650.4	±	265.455
38	90576-03AL	11	0.0991892	±	0.0003339	0.0019055	±	2.1e-05	0.0003599	±	2.27e-05	0.14583	±	0.003099	0.0002857	±	6.40403e-06	99.5045	±	22.9449	0.494153	0.00132779	94.6811	5.31889	105.854	0.0164126	-12.7802	0.794181	6.11576	99.9997	0.000277124	86.3637	0.109974	13.5264	156.002	-0.0739343	1332.45	±	217.657
39	90576-03AM	12	0.245201	±	0.0005014	0.0046479	±	3.04e-05	0.0016583	±	4.55e-05	0.60313	±	0.0120547	0.0011618	±	1.04e-05	108.987	±	34.6488	-8.98816	0.00125895	90.9814	9.01859	94.6063	-0.160164	1.72999	0.712859	3.11104	99.9998	0.000157053	87.459	-1.21601	13.757	275.27	0.0196741	1473.14	±	320.408
40	90576-03AN	12.5	0.222006	±	0.0007377	0.0040968	±	2.56e-05	0.0008387	±	3.12e-05	0.306061	±	0.0102265	0.0006052	±	8.16908e-06	95.7038	±	22.2964	4.29494	0.00127716	94.8078	5.19215	95.3576	0.137009	-1.85973	0.715248	5.64992	99.9997	0.000284268	85.5885	1.00995	13.4015	152.081	-0.0116457	1332.38	±	219.71
41	90576-03AO	13	0.43476	±	0.0007267	0.0087219	±	3.81e-05	0.0048113	±	6.69e-05	1.93245	±	0.017179	0.0035822	±	1.92e-05	163.56	±	58.0009	-63.5612	0.00123897	84.6014	15.3986	104.208	-0.692169	-6.17373	0.787229	1.87105	99.9999	8.5532e-05	90.6494	-4.94501	14.2956	505.448	-0.11674	1937.09	±	421.604
42	90576-03AP	13.5	0.362143	±	0.0010046	0.007341	±	3.82e-05	0.0039278	±	6.49e-05	1.57706	±	0.0143316	0.0029717	±	1.72e-05	141.606	±	56.9338	-41.6074	0.00125884	85.0693	14.9307	104.185	-0.462311	-6.44907	0.786966	1.93972	99.9999	8.87006e-05	89.1869	-3.25028	14.0634	487.392	-0.117629	1752.14	±	451.178
43	90576-03AQ	14	0.366154	±	0.0005493	0.0074284	±	3.56e-05	0.0039188	±	6.41e-05	1.60698	±	0.0143365	0.0029528	±	2.41e-05	173.969	±	57.8115	-73.97	0.00125833	84.9651	15.0349	106.402	-0.832913	-8.33766	0.803735	1.96491	99.9999	8.7978e-05	91.4579	-5.87978	14.4219	491.395	-0.150127	1992.43	±	401.306
44	90576-03AR	15	0.558351	±	0.0013047	0.0120275	±	5.15e-05	0.0084759	±	0.0001306	3.20941	±	0.0286244	0.0065273	±	2.51e-05	19.7794	±	74.763	80.2193	0.00128087	81.4547	18.5453	98.1805	0.636845	-0.969616	0.742156	1.41015	99.9999	6.83776e-05	82.5715	4.39874	13.0298	632.253	-0.0243272	366.206	±	1253.03
Isotope abundances given in Volts at time-zero (spectrometer sensitivity is ~6.5 x 10-15 moles/Volt), and corrected for 37Ar and 39Ar decay, half lives of 34.95 days and 269 years, respectively.
Isotope sources calculated using the reactor constants in Renne et al. (2005).
Corrections were not made for cosmogenic 40Ar.
Ages calculated using the decay constants and standard calibration of Renne et al. (2011) and calculated relative to Hb3gr fluence monitor (1081 Ma, Renne et al. 2011).
40K/39K isotope abundance used is 0.01167 ± 0.0000205 (Steiger and Jäger 1977).

## Sheet: MIL1
COMPLETE 40Ar/39Ar INCREMENTAL HEATING RESULTS
#	Run ID	Laser Power	40Ar ± 1s			39Ar ± 1s			38Ar ± 1s			37Ar ± 1s			36Ar ± 1s			40Ar* (%) ± 1s			40Aratm (%)	40ArK (%)	39ArK (%)	39ArCa (%)	38Arcos (%)	38Aratm (%)	38ArCl (%)	38ArCa (%)	38ArK (%)	37ArCa (%)	37ArK (%)	36Arcos (%)	36Aratm (%)	36ArCa (%)	Ca/K	Cl/K	Apparent Age ± 1s (Ma)
MIL 03346 groundmass								J =	0.019996	±	6e-05
1	90571-01A	5	0.0023135	±	0.0002412	0.0001505	±	2.33e-05	1.03e-05	±	2.25e-05	0.0044039	±	0.0014956	3.37327e-06	±	5.05047e-06	558.913	±	404.88	-458.918	0.00465229	97.9663	2.03368	135.093	-12.4223	-40.9728	0.838017	17.4637	99.9993	0.000749935	267.161	-201.757	34.5962	57.6472	-0.0830076	1831.53	±	845.34
2	90571-01B	6	-0.000629	±	0.0002094	5.26e-05	±	2.07e-05	-3.11104e-06	±	2.67e-05	0.001103	±	0.0022455	2.28514e-06	±	4.3245e-06	28.4907	±	1581.37	71.5153	-0.00601564	98.5426	1.45737	-113.215	1.74252	232.494	-0.694898	-20.3266	99.9989	0.00105265	99.8276	-12.6186	12.791	41.0694	-0.404675	-129.535	±	-7453.65
3	90571-01C	6.5	0.740354	±	0.000862	0.0106039	±	4.8e-05	0.0002981	±	3.83e-05	0.017605	±	0.0024404	6.92e-05	±	6.15754e-06	97.3916	±	2.08475	2.60734	0.00104435	99.8846	0.115371	27.0167	0.780385	28.7398	0.115737	43.3473	99.9865	0.0134765	75.3775	17.8816	6.74089	3.20753	0.0234574	1553.55	±	22.7762
4	90571-01D	6.6	0.560286	±	0.0007471	0.0085854	±	4.29e-05	0.0001677	±	3.02e-05	0.0038235	±	0.0021306	3.82e-05	±	5.72494e-06	95.6207	±	3.71594	4.37819	0.00111825	99.9691	0.0309362	19.7605	1.7628	15.9934	0.0446648	62.4386	99.9497	0.0502821	56.1851	41.1639	2.65109	0.859357	0.00906248	1464.83	±	39.311
5	90571-01E	6.7	3.34439	±	0.0017076	0.051408	±	9.39e-05	0.0011369	±	5.37e-05	0.0520204	±	0.0030864	0.0003103	±	7.999e-06	94.8677	±	0.79059	5.13123	0.00112132	99.9297	0.0703124	25.3298	1.81907	17.6346	0.0896626	55.1268	99.9779	0.0221207	60.1071	35.4513	4.44162	1.95393	0.0113178	1454.16	±	8.50906
6	90571-01F	6.8	1.81428	±	0.0015075	0.0283651	±	7.01e-05	0.0005948	±	4.67e-05	0.0298088	±	0.0024575	0.0001732	±	6.67976e-06	94.8235	±	1.06267	5.17538	0.00114048	99.927	0.0730218	27.2855	1.90243	12.5764	0.0982058	58.1374	99.9787	0.0212996	60.6886	34.7515	4.55984	2.02928	0.00765349	1436.84	±	11.3474
7	90571-01G	6.9	2.60511	±	0.002804	0.0404635	±	8.97e-05	0.0009141	±	4.01e-05	0.04399	±	0.0027023	0.0002285	±	6.59285e-06	96.1677	±	0.844998	3.83115	0.00113301	99.9245	0.0755416	25.8207	1.31581	18.8056	0.0943033	53.9637	99.9794	0.0205887	66.9002	27.9991	5.10063	2.09936	0.0123294	1457.41	±	9.0036
8	90571-01H	7	2.62853	±	0.0027047	0.0408367	±	8.89e-05	0.0009205	±	3.85e-05	0.0468285	±	0.0027009	0.0002297	±	6.94214e-06	96.5465	±	0.846089	3.45241	0.00113322	99.9203	0.0796819	26.6902	1.18808	17.9416	0.0996914	54.0805	99.9805	0.0195183	69.2735	25.325	5.40145	2.21451	0.0117376	1461.15	±	8.99175
9	90571-01I	7.1	4.30198	±	0.0024082	0.0675886	±	0.0001222	0.0015394	±	6.23e-05	0.0757533	±	0.0029292	0.0003799	±	8.55966e-06	96.3741	±	0.680948	3.62471	0.00114601	99.9221	0.07788	26.0648	1.22074	19.0947	0.0964316	53.5234	99.98	0.0199702	68.4052	26.3116	5.28313	2.1644	0.0126219	1448.15	±	7.24626
10	90571-01J	7.2	5.42228	±	0.0023112	0.0863529	±	0.0001229	0.001902	±	6.32e-05	0.0999463	±	0.0030195	0.0004824	±	9.16535e-06	96.6153	±	0.632283	3.38351	0.00116163	99.9196	0.0804249	27.4636	1.16244	15.9262	0.102974	55.3448	99.9807	0.0193379	70.1316	24.3791	5.48935	2.23518	0.010181	1437.18	±	6.62713
11	90571-01K	7.3	5.36197	±	0.0047063	0.0861391	±	0.0001135	0.0016976	±	6.2e-05	0.0993836	±	0.0034532	0.0004352	±	9.27063e-06	97.9035	±	0.662255	2.09531	0.00117179	99.9198	0.0801706	30.6371	0.797574	6.59538	0.114723	61.8552	99.9806	0.0193993	77.401	16.5485	6.05045	2.22811	0.00377243	1441.68	±	6.79136
12	90571-01L	7.4	5.84314	±	0.0038068	0.0955494	±	0.0001327	0.0019735	±	6.14e-05	0.113831	±	0.0033869	0.0004681	±	9.91202e-06	98.4732	±	0.647597	1.5256	0.00119274	99.9172	0.082782	29.7923	0.544357	10.5314	0.113031	59.0189	99.9812	0.0187869	81.3496	12.2074	6.44297	2.30074	0.00631326	1429.88	±	6.61102
13	90571-01M	7.5	11.4597	±	0.0077029	0.187357	±	0.0002018	0.0037889	±	7.99e-05	0.210598	±	0.0033504	0.0008914	±	1.14e-05	98.4466	±	0.538692	1.55217	0.00119256	99.9219	0.078106	29.4049	0.565761	9.64003	0.108921	60.2804	99.9801	0.0199123	80.9491	12.7913	6.25953	2.17068	0.00565796	1429.76	±	5.47073
14	90571-01N	7.6	8.662	±	0.0066029	0.142222	±	0.0001618	0.0030143	±	6.71e-05	0.154832	±	0.0041057	0.0006475	±	1.04e-05	98.7606	±	0.581402	1.23818	0.00119768	99.9244	0.0756467	27.5437	0.428794	14.4079	0.100656	57.5189	99.9794	0.0205601	83.0467	10.6179	6.33544	2.10228	0.00886237	1428.67	±	5.87391
15	90571-01O	7.7	7.49199	±	0.005703	0.123583	±	0.0001617	0.002526	±	7.07e-05	0.131081	±	0.0035295	0.0005853	±	1.02e-05	98.1205	±	0.588714	1.87825	0.00120327	99.9263	0.0737011	28.1396	0.671353	11.4437	0.101688	59.6437	99.9789	0.0211031	78.6548	15.4116	5.93355	2.04817	0.00678828	1417.68	±	5.98797
16	90571-01P	7.8	25.4002	±	0.0100015	0.411018	±	0.0006114	0.0100682	±	0.0001116	0.485209	±	0.0073001	0.0030774	±	2.53e-05	91.8939	±	0.60807	8.10489	0.00118029	99.918	0.0820296	24.9843	2.46415	22.6935	0.0944388	49.7637	99.981	0.0189594	52.9404	42.8822	4.17742	2.27981	0.0161342	1372.68	±	6.51263
17	90571-01Q	7.9	8.10148	±	0.0027031	0.13663	±	0.0001511	0.004331	±	8.12e-05	0.155453	±	0.0038371	0.0006857	±	1.04e-05	97.7927	±	0.60001	2.2061	0.00123016	99.9209	0.0790587	18.8925	0.497319	42.0828	0.0703364	38.457	99.9803	0.0196723	77.2852	16.7082	6.00654	2.19718	0.0387157	1392.81	±	6.04638
18	90571-01R	8	9.26153	±	0.0039023	0.156811	±	0.0001611	0.0035923	±	7.23e-05	0.170974	±	0.004294	0.0007754	±	1.13e-05	97.6963	±	0.58946	2.30249	0.00123506	99.9242	0.0757619	25.505	0.715388	20.4714	0.0932664	53.2149	99.9795	0.0205288	76.5289	17.6291	5.842	2.10549	0.0136104	1388.01	±	5.91665
19	90571-01S	8.1	6.67298	±	0.0047021	0.113339	±	0.0001413	0.002965	±	5.86e-05	0.129107	±	0.0036767	0.0005822	±	8.72585e-06	97.4721	±	0.630297	2.52667	0.00123891	99.9208	0.0791534	22.9082	0.685293	29.7227	0.0853291	46.5985	99.9804	0.0196487	75.5606	18.564	5.87543	2.19981	0.022567	1382.77	±	6.32885
20	90571-01T	8.2	4.14438	±	0.0037031	0.0703107	±	0.0001118	0.0017252	±	5.58e-05	0.0738579	±	0.0036943	0.0003617	±	7.45379e-06	96.9256	±	0.759438	3.07317	0.00123756	99.927	0.0729907	23.3129	0.889694	26.0286	0.0838921	49.6849	99.9787	0.0213086	72.0178	22.5722	5.41006	2.02842	0.0185346	1378.39	±	7.66316
21	90571-01U	8.3	5.914	±	0.0024058	0.101488	±	0.0001318	0.0025254	±	5.31e-05	0.113624	±	0.0031264	0.0005062	±	8.64114e-06	97.7268	±	0.627739	2.27194	0.00125176	99.9222	0.077795	23.8421	0.641181	26.4385	0.0881677	48.9901	99.98	0.019992	77.0379	17.015	5.94713	2.16203	0.0190935	1375.33	±	6.29943
22	90571-01V	8.4	7.09211	±	0.0053031	0.122846	±	0.000142	0.0030866	±	5.34e-05	0.16631	±	0.0037695	0.0006609	±	9.76113e-06	98.0739	±	0.674145	1.9248	0.00126328	99.9059	0.0940741	26.4785	0.532984	24.3728	0.10559	48.5101	99.9835	0.0165304	80.0922	13.2404	6.66741	2.61488	0.0177759	1369.93	±	6.65691
23	90571-01W	8.5	4.31825	±	0.0041049	0.0742429	±	0.0001227	0.0016829	±	4.73e-05	0.093172	±	0.0031081	0.0003914	±	8.66803e-06	97.7798	±	0.740022	2.21896	0.00125398	99.9128	0.0872043	28.0093	0.686171	17.4214	0.108494	53.7746	99.9822	0.0178336	77.9996	15.6932	6.30715	2.42376	0.0114621	1374.15	±	7.40025
24	90571-01X	8.6	5.63969	±	0.0041046	0.0984988	±	0.0001324	0.0024221	±	5.56e-05	0.154954	±	0.0036593	0.0005857	±	1.06e-05	97.8633	±	0.770648	2.13548	0.00127357	99.8907	0.109319	29.7977	0.599227	19.9186	0.125373	49.5591	99.9858	0.0142233	79.809	13.1811	7.0099	3.03908	0.0142198	1360.09	±	7.60504
25	90571-01Y	8.7	6.02156	±	0.0027054	0.106418	±	0.0001518	0.002826	±	8.35e-05	0.216027	±	0.0049798	0.000786	±	9.89523e-06	96.7103	±	0.889969	3.28839	0.0012883	99.8589	0.141069	32.8812	0.84441	20.2481	0.149811	45.8764	99.989	0.011019	76.5685	16.149	7.28255	3.92298	0.0156154	1337.9	±	8.79393
26	90571-01Z	8.8	4.77272	±	0.0023051	0.0833526	±	0.000112	0.0018518	±	4.84e-05	0.118729	±	0.0024895	0.0004955	±	9.25311e-06	96.9535	±	0.722751	3.04518	0.00127364	99.901	0.0989817	30.9231	0.945841	13.1456	0.125647	54.8599	99.9843	0.0157101	74.8489	18.8023	6.3488	2.75142	0.00847779	1351.14	±	7.19438
27	90571-01AA	8.8	3.04105	±	0.0032031	0.0527304	±	9.71e-05	0.0012078	±	4.86e-05	0.0629646	±	0.0031956	0.0002908	±	7.53693e-06	96.7321	±	0.873919	3.26663	0.00126474	99.917	0.0829734	26.9015	0.991201	18.7863	0.102159	53.2188	99.9813	0.0187436	72.3652	21.898	5.73676	2.30607	0.0124892	1355.64	±	8.7372
28	90571-01AB	8.9	2.42211	±	0.0016061	0.0421646	±	7.88e-05	0.0008882	±	5.29e-05	0.0534923	±	0.0025917	0.0002443	±	7.21051e-06	96.4181	±	0.916251	3.58065	0.00126968	99.9118	0.0881559	30.3398	1.17673	10.5007	0.118021	57.8647	99.9824	0.0176409	71.4419	22.7566	5.80146	2.45023	0.00642038	1348.83	±	9.18522
29	90571-01AC	9	2.62755	±	0.0016067	0.0456634	±	7.74e-05	0.0011075	±	4.36e-05	0.0575756	±	0.0027685	0.0002668	±	7.77266e-06	96.2442	±	0.908933	3.75449	0.00126754	99.9124	0.0876149	26.2525	1.07347	22.3143	0.101876	50.2578	99.9823	0.0177499	70.58	23.7023	5.7177	2.43518	0.0157086	1348.72	±	9.10219
30	90571-01AD	9.3	4.9031	±	0.0023056	0.0869891	±	0.0001228	0.0028238	±	6.49e-05	0.262602	±	0.0052973	0.0008439	±	1.05e-05	96.4643	±	1.1724	3.53438	0.00129242	99.7902	0.209791	36.2641	0.739575	25.3099	0.182259	37.5041	99.9926	0.00740462	78.591	13.1634	8.24557	5.83808	0.0238765	1332.47	±	11.5275
31	90571-01AE	9.6	8.21007	±	0.0030035	0.146909	±	0.0001618	0.0054283	±	8.15e-05	0.538716	±	0.0090169	0.0016589	±	1.44e-05	96.0759	±	1.32147	3.92275	0.00130291	99.7452	0.254842	37.2525	0.715002	28.9047	0.194503	32.9333	99.9939	0.00609295	78.9499	12.4449	8.60516	7.09498	0.0310521	1321.08	±	12.9296
32	90571-01AF	9.9	3.22113	±	0.0034027	0.0580429	±	9.43e-05	0.0022007	±	4.84e-05	0.228013	±	0.0041431	0.0006776	±	9.7319e-06	96.6319	±	1.47224	3.36679	0.00131182	99.727	0.273005	38.4237	0.593877	28.6901	0.203063	32.0893	99.9943	0.00568656	80.8237	10.2595	8.91677	7.60205	0.0316321	1320.1	±	14.3209
33	90571-01AG	10.2	2.70956	±	0.0034027	0.0492052	±	9.99e-05	0.0022373	±	4.99e-05	0.248491	±	0.0044652	0.000764	±	9.20366e-06	92.8612	±	1.82549	7.13745	0.00132101	99.649	0.350966	39.6253	1.04172	32.3778	0.217683	26.7374	99.9956	0.00441999	75.1548	16.2265	8.61875	9.78059	0.0428436	1276.77	±	18.0616
34	90571-01AH	10.5	2.08807	±	0.0027037	0.0378778	±	8.11e-05	0.0021767	±	5.65e-05	0.345691	±	0.007888	0.0009053	±	1.13e-05	95.1997	±	3.14539	4.79895	0.00131583	99.3657	0.634275	53.1615	0.554786	24.8773	0.311268	21.0951	99.9976	0.00243883	82.7858	7.09535	10.1188	17.7261	0.0417233	1303.33	±	30.7277
35	90571-01AI	10.8	2.39263	±	0.0026047	0.0441639	±	8.62e-05	0.0032975	±	6.16e-05	0.722128	±	0.0102076	0.0017022	±	1.43e-05	99.8907	±	5.0901	0.107952	0.00133215	98.8636	1.13639	70.665	0.00943958	12.7424	0.42922	16.154	99.9986	0.00135437	88.6607	0.0972678	11.242	31.9199	0.0279081	1336.85	±	48.1742
36	90571-01AJ	11.1	2.08332	±	0.001411	0.038376	±	8.37e-05	0.003206	±	6.12e-05	0.828865	±	0.0100763	0.0018748	±	1.44e-05	104.284	±	6.54268	-4.28555	0.00132452	98.4989	1.50108	82.4679	-0.335608	2.97668	0.506724	14.3843	99.999	0.00102154	91.3369	-3.05269	11.7157	42.32	0.00732154	1383.48	±	60.6953
37	90571-01AK	11.4	1.64331	±	0.0014111	0.029903	±	8.08e-05	0.0030801	±	6.12e-05	0.818201	±	0.0068328	0.0018777	±	2.03e-05	101.575	±	8.11796	-1.57629	0.00130311	98.0984	1.90163	84.0893	-0.10135	3.87234	0.520652	11.6191	99.9992	0.000803091	89.3371	-0.884311	11.5472	53.8316	0.0117912	1373.81	±	76.9543
38	90571-01AL	11	0.671103	±	0.0013093	0.0121166	±	5.14e-05	0.0009943	±	4.27e-05	0.246672	±	0.0043957	0.0005966	±	8.50291e-06	95.2333	±	6.48934	4.7654	0.00129935	98.5851	1.41488	79.3091	0.387618	5.16039	0.486243	14.6566	99.9989	0.00108473	85.6071	3.43622	10.9566	39.8548	0.0124568	1315.4	±	63.7861
39	90571-01AM	12	2.11487	±	0.0027036	0.0388726	±	7.89e-05	0.0027694	±	5.64e-05	0.563969	±	0.0074305	0.0014827	±	1.23e-05	89.1156	±	4.53428	10.883	0.00132826	98.9917	1.0083	66.1059	1.00157	15.5415	0.399134	16.9518	99.9985	0.00152839	79.9697	9.95074	10.0795	28.2855	0.0324366	1234.55	±	45.5433
40	90571-01AN	12.5	1.73909	±	0.0013066	0.032428	±	7.1e-05	0.0026588	±	5.92e-05	0.585118	±	0.0085757	0.0014403	±	1.23e-05	93.9154	±	5.68059	6.08322	0.00134413	98.746	1.25402	70.6977	0.479515	13.6983	0.431329	14.6931	99.9988	0.00122587	84.5261	4.70844	10.7654	35.266	0.0329846	1271.23	±	55.2565
41	90571-01AO	13	1.57778	±	0.0011077	0.029261	±	7.11e-05	0.002947	±	7.49e-05	0.680351	±	0.011718	0.0016624	±	1.33e-05	92.0734	±	7.30434	7.92522	0.00133195	98.3841	1.61594	73.4515	0.511342	13.6669	0.452486	11.9177	99.9991	0.000947827	84.3331	4.82168	10.8452	45.6113	0.0405729	1261.48	±	72.0777
42	90571-01AP	13.5	1.89035	±	0.0013072	0.0350534	±	8.71e-05	0.0032894	±	5.41e-05	0.7212	±	0.0130597	0.0017531	±	1.43e-05	94.276	±	6.52853	5.72269	0.00133431	98.5701	1.4299	70.0624	0.396331	16.2965	0.429725	12.815	99.9989	0.00107317	85.1428	3.95558	10.9016	40.2841	0.0449918	1281.45	±	63.6127
43	90571-01AQ	14	1.66653	±	0.0013087	0.0306874	±	7.21e-05	0.0033982	±	6.14e-05	0.835063	±	0.0233639	0.0020609	±	1.44e-05	88.0838	±	9.14419	11.9149	0.00131879	98.1088	1.89121	77.8009	0.704186	10.2045	0.48164	10.8088	99.9992	0.000807601	83.0863	6.1762	10.7375	53.5309	0.0334017	1230.53	±	92.6878
44	90571-01AR	15	1.27196	±	0.0011102	0.0235273	±	6.92e-05	0.0032768	±	6.14e-05	0.843278	±	0.0106226	0.0020405	±	1.35e-05	87.7466	±	10.7558	12.2521	0.00131664	97.509	2.49104	80.9099	0.57315	9.47123	0.504399	8.54135	99.9994	0.000609388	84.1526	4.8958	10.9516	70.9429	0.0392318	1228.57	±	109.324
Isotope abundances given in Volts at time-zero (spectrometer sensitivity is ~6.5 x 10-15 moles/Volt), and corrected for 37Ar and 39Ar decay, half lives of 34.95 days and 269 years, respectively.
Isotope sources calculated using the reactor constants in Renne et al. (2005).
Corrections were not made for cosmogenic 40Ar.
Ages calculated using the decay constants and standard calibration of Renne et al. (2011) and calculated relative to Hb3gr fluence monitor (1081 Ma, Renne et al. 2011).
40K/39K isotope abundance used is 0.01167 ± 0.0000205 (Steiger and Jäger 1977).

## Sheet: MIL2
COMPLETE 40Ar/39Ar INCREMENTAL HEATING RESULTS
#	Run ID	Laser Power	40Ar ± 1s			39Ar ± 1s			38Ar ± 1s			37Ar ± 1s			36Ar ± 1s			40Ar* (%) ± 1s			40Aratm (%)	40ArK (%)	39ArK (%)	39ArCa (%)	38Arcos (%)	38Aratm (%)	38ArCl (%)	38ArCa (%)	38ArK (%)	37ArCa (%)	37ArK (%)	36Arcos (%)	36Aratm (%)	36ArCa (%)	Ca/K	Cl/K	Apparent Age ± 1s (Ma)
MIL 03346 groundmass								J =	0.019996	±	6e-05
1	90571-02A	5	-0.0010004	±	0.0002211	2.97403e-06	±	2.96e-05	9.47946e-06	±	2.73e-05	0.004246	±	0.0021069	-9.64217e-07	±	4.79976e-06	-1545	±	-1058.7	1645	-1.68271e-06	0.775379	99.2246	137.79	-20.9213	-17.7493	0.877915	0.00296781	100	1.21654e-07	-877.361	1094.06	-116.695	355368	-211.594	17183.4	±	2.32363e+06
2	90571-02B	6	-0.0014132	±	0.0002044	-8.1e-05	±	2.78e-05	-6.36e-05	±	2.74e-05	-0.0036847	±	0.0023277	-8.81694e-06	±	4.89931e-06	58.8592	±	755.133	41.1367	0.00405184	96.8385	3.16155	18.1295	0.110156	80.1422	0.113553	1.50465	99.9995	0.000476847	84.6988	4.2266	11.0746	90.6618	1.88444	347.725	±	4059.69
3	90571-02C	6.5	0.234824	±	0.000821	0.0030859	±	3.24e-05	4.16e-05	±	2.25e-05	0.0040431	±	0.0021703	8.61035e-06	±	5.27215e-06	103.646	±	5.86984	-3.64689	0.000958443	99.909	0.0910423	48.3566	-2.48088	-36.4837	0.19046	90.4176	99.9829	0.0170813	151.315	-63.7559	12.4413	2.53053	-0.0142759	1712.72	±	63.6437
4	90571-02D	6.6	1.67458	±	0.0013084	0.0239207	±	6.32e-05	0.0006065	±	3.73e-05	0.0240868	±	0.0024824	0.0001463	±	6.68616e-06	95.0272	±	1.13118	4.97172	0.00104205	99.93	0.069967	22.0334	1.6543	28.1507	0.077823	48.0838	99.9778	0.02223	59.1589	36.4791	4.36198	1.94433	0.0207132	1530.35	±	12.5645
5	90571-02E	6.7	4.8398	±	0.0023061	0.073474	±	0.0001124	0.0014773	±	5.28e-05	0.0902948	±	0.0029828	0.0004221	±	9.57445e-06	96.7803	±	0.658905	3.21861	0.00110728	99.9146	0.0853955	31.179	1.27075	6.80517	0.119776	60.6253	99.9818	0.0182116	70.6754	23.6568	5.6678	2.37344	0.00397139	1486.93	±	7.05713
6	90571-02F	6.8	5.92858	±	0.0026055	0.0937086	±	0.0001321	0.0017737	±	6.23e-05	0.107077	±	0.0037561	0.0004595	±	9.30303e-06	98.2424	±	0.632606	1.75646	0.00115294	99.9206	0.079399	31.719	0.707524	3.05097	0.1183	64.4042	99.9804	0.0195879	79.2989	14.5271	6.17405	2.20664	0.00167603	1461.32	±	6.59262
7	90571-02G	6.9	3.95872	±	0.0021056	0.0637859	±	0.0001021	0.0012672	±	5.52e-05	0.0694904	±	0.0027885	0.0003015	±	8.42947e-06	98.3507	±	0.693451	1.64809	0.00117534	99.9243	0.0757	29.3967	0.620473	8.51181	0.10746	61.3635	99.9795	0.0205456	80.022	13.8715	6.10652	2.10376	0.0049076	1443.21	±	7.16918
8	90571-02H	7	4.90914	±	0.0044025	0.0793769	±	0.0001117	0.0016518	±	5.31e-05	0.0865648	±	0.0032312	0.0003498	±	8.25704e-06	99.1583	±	0.656003	0.840495	0.00117946	99.9242	0.075778	28.081	0.301034	12.9329	0.102695	58.5824	99.9795	0.0205245	85.8821	7.56129	6.55659	2.10593	0.00781062	1447.87	±	6.6795
9	90571-02I	7.1	6.3378	±	0.0050022	0.102991	±	0.0001414	0.0019639	±	5.51e-05	0.105763	±	0.0037135	0.0004376	±	9.08687e-06	99.1904	±	0.611954	0.808415	0.00118542	99.9286	0.071355	29.6186	0.314403	6.02785	0.10553	63.9336	99.9782	0.0217974	86.0913	7.50535	6.40334	1.98293	0.00333573	1443.17	±	6.23476
10	90571-02J	7.2	6.3468	±	0.0027047	0.105207	±	0.0001514	0.001992	±	5.92e-05	0.111353	±	0.0035893	0.0004979	±	8.38288e-06	98.1073	±	0.606256	1.8915	0.00120919	99.9265	0.0735448	30.3407	0.726282	4.43682	0.109541	64.3866	99.9789	0.021148	78.6187	15.4559	5.92537	2.04383	0.002438	1412.73	±	6.20658
11	90571-02K	7.3	9.55301	±	0.0058027	0.1603	±	0.0001815	0.0030889	±	6.93e-05	0.172371	±	0.0042736	0.0007173	±	1.06e-05	98.8587	±	0.573121	1.14008	0.00122403	99.9253	0.0747181	30.082	0.424918	6.11851	0.109352	63.2652	99.9792	0.0208157	83.9001	9.73308	6.36678	2.07646	0.00342168	1408.25	±	5.7484
12	90571-02L	7.4	8.72153	±	0.0028073	0.146303	±	0.0001619	0.0029837	±	8.25e-05	0.171077	±	0.0043444	0.0006982	±	1.07e-05	98.6356	±	0.6027	1.36322	0.00122358	99.9187	0.0812528	29.8409	0.480215	9.7934	0.112359	59.7731	99.9809	0.0191407	82.5923	10.9157	6.49193	2.25821	0.00579676	1406.41	±	6.06191
13	90571-02M	7.5	8.75421	±	0.0037055	0.148144	±	0.000152	0.0029145	±	7.19e-05	0.160694	±	0.0037342	0.0006931	±	1.07e-05	98.367	±	0.577252	1.6318	0.00123442	99.9246	0.075372	29.6114	0.590681	7.72402	0.108044	61.9658	99.9794	0.020635	80.6455	13.2118	6.1427	2.09464	0.0044101	1395.15	±	5.77777
14	90571-02N	7.6	8.67641	±	0.0058027	0.147257	±	0.0001616	0.0030021	±	5.7e-05	0.181109	±	0.0039664	0.0007249	±	1.15e-05	98.583	±	0.620658	1.41574	0.0012379	99.9145	0.0854618	30.7645	0.493095	8.8329	0.11822	59.7913	99.9818	0.0181975	82.5182	10.8622	6.61956	2.37528	0.00522665	1394.54	±	6.17788
15	90571-02O	7.7	7.19591	±	0.005402	0.121598	±	0.0001513	0.0023585	±	5.75e-05	0.129017	±	0.0037424	0.0006377	±	1.04e-05	96.7369	±	0.621463	3.26189	0.00123266	99.9263	0.0737248	29.6594	1.19937	6.1807	0.107195	62.8534	99.9789	0.0210963	71.0451	23.5947	5.36023	2.04883	0.0034791	1380.34	±	6.27581
16	90571-02P	7.8	8.11452	±	0.005102	0.138235	±	0.0001613	0.0029732	±	7.21e-05	0.163829	±	0.0035848	0.0007271	±	1.15e-05	97.4134	±	0.619634	2.58536	0.00124257	99.9176	0.0823525	28.5209	0.850342	13.8453	0.10798	56.6755	99.9811	0.018885	75.5347	18.4955	5.96982	2.2888	0.00864298	1379.34	±	6.21093
17	90571-02Q	7.9	0.594287	±	0.0013083	0.0106305	±	4.81e-05	0.0002251	±	3.9e-05	0.016048	±	0.0024075	5.25e-05	±	6.43357e-06	100.223	±	2.66703	-0.224655	0.00130444	99.8951	0.104903	33.6811	-0.0714777	8.69577	0.139713	57.5549	99.9852	0.0148226	93.5309	-1.63016	8.09922	2.91619	0.00534544	1359.98	±	25.7168
18	90571-02R	8	5.86292	±	0.0048021	0.100944	±	0.000251	0.0024852	±	6.33e-05	0.190035	±	0.0082148	0.0006563	±	1.34e-05	98.2771	±	1.01421	1.72169	0.00125523	99.8692	0.130823	33.6261	0.489487	16.2452	0.149857	49.4894	99.9881	0.0118831	82.4685	9.85921	7.67228	3.63769	0.0116137	1378.08	±	10.2073
19	90571-02S	8.1	3.17326	±	0.0032033	0.0545078	±	9.87e-05	0.0014089	±	5.35e-05	0.0655332	±	0.0037369	0.0003091	±	9.63833e-06	96.3944	±	0.95506	3.60432	0.00125289	99.9165	0.0835423	23.9364	0.978323	27.8339	0.0911499	47.1602	99.9814	0.0186158	70.6632	23.7195	5.6173	2.32189	0.0208813	1361.29	±	9.58552
20	90571-02T	8.2	2.61845	±	0.0024045	0.0451419	±	7.81e-05	0.0011538	±	4.78e-05	0.0937855	±	0.0036054	0.0003267	±	7.89031e-06	97.4798	±	1.08225	2.51893	0.0012567	99.8556	0.144376	34.7352	0.688913	16.7535	0.1593	47.663	99.9892	0.0107663	79.4519	12.9416	7.60651	4.01508	0.012436	1369.11	±	10.7531
21	90571-02U	8.3	3.82585	±	0.0035032	0.0663478	±	0.0001812	0.0020408	±	4.78e-05	0.191133	±	0.0085965	0.0005356	±	1.24e-05	100.107	±	1.42193	-0.108714	0.00126343	99.7998	0.200198	36.8917	-0.024561	23.3657	0.183551	39.5836	99.9922	0.00776013	91.0418	-0.497793	9.45599	5.57061	0.0208844	1389.62	±	13.9995
22	90571-02V	8.4	2.28105	±	0.0027043	0.0394377	±	0.0001315	0.0011784	±	4.22e-05	0.0834476	±	0.0033558	0.0002951	±	6.86353e-06	97.0439	±	1.11778	2.95486	0.00126026	99.853	0.147042	30.1073	0.689305	28.2947	0.138781	40.7699	99.9894	0.0105708	77.866	14.6412	7.49281	4.08934	0.0245541	1362.1	±	11.4192
23	90571-02W	8.5	2.27816	±	0.0027044	0.0398114	±	0.0001216	0.0010194	±	7.13e-05	0.11233	±	0.006906	0.0003505	±	7.50788e-06	97.7501	±	1.64565	2.24864	0.00127319	99.8039	0.196082	43.6053	0.605611	8.02096	0.215959	47.5522	99.9921	0.00792335	82.1389	9.36898	8.49215	5.45585	0.00596779	1359.27	±	16.3113
24	90571-02X	8.6	2.15992	±	0.0014088	0.0378595	±	0.0001514	0.0012818	±	4.9e-05	0.138246	±	0.0077734	0.0004093	±	8.43461e-06	97.376	±	1.91859	2.62269	0.00127631	99.7462	0.253767	40.5158	0.532595	22.7975	0.211379	35.9427	99.9939	0.00611881	82.1779	8.87192	8.95015	7.065	0.0224406	1353.28	±	19.1461
25	90571-02Y	8.7	2.89013	±	0.0027037	0.0523078	±	9.37e-05	0.0021655	±	6.03e-05	0.19925	±	0.0040384	0.0006734	±	1.02e-05	92.4708	±	1.50853	7.52791	0.00131771	99.7353	0.264723	34.305	1.21079	34.9127	0.180331	29.3912	99.9941	0.00586495	71.4488	20.7107	7.84055	7.37082	0.0420267	1275.2	±	14.9921
26	90571-02Z	8.8	1.79996	±	0.0013062	0.0323438	±	7.17e-05	0.0012921	±	3.77e-05	0.120001	±	0.0039434	0.0004068	±	6.87247e-06	92.7293	±	1.62525	7.26939	0.00130837	99.7422	0.257841	34.7882	1.22039	33.3491	0.18202	30.4603	99.994	0.0060219	71.5649	20.6184	7.81669	7.17869	0.0387355	1284.29	±	16.2302
27	90571-02AA	8.8	1.06749	±	0.0017041	0.0189588	±	5.4e-05	0.0006964	±	2.63e-05	0.0521203	±	0.00293	0.0002203	±	5.95598e-06	89.459	±	1.7581	10.5398	0.00129402	99.809	0.191049	29.7908	1.947	34.9657	0.146679	33.1498	99.9919	0.00813245	60.9929	32.7381	6.26907	5.31555	0.037318	1261.56	±	17.9774
28	90571-02AB	8.9	0.798776	±	0.000858	0.0140181	±	5.1e-05	0.0004224	±	3.2e-05	0.0347645	±	0.0032071	0.0001317	±	5.82004e-06	94.0127	±	2.21128	5.98603	0.0012789	99.8277	0.172343	33.5694	1.36419	24.487	0.161298	40.4181	99.991	0.00901679	69.7324	23.2731	6.9945	4.79418	0.0214347	1318.17	±	22.2545
29	90571-02AC	9	0.784399	±	0.0008488	0.0138938	±	4.92e-05	0.0005452	±	2.95e-05	0.0357358	±	0.0030573	0.0001477	±	6.4788e-06	91.1169	±	2.27269	8.88183	0.00129071	99.8213	0.178743	26.4993	1.53999	40.7976	0.128459	31.0347	99.9913	0.00869338	63.3522	30.2367	6.41108	4.97255	0.0465097	1280.66	±	23.0978
30	90571-02AD	9.3	1.39023	±	0.0012074	0.0254956	±	6.31e-05	0.0014437	±	4.4e-05	0.203625	±	0.0044036	0.0005656	±	7.66416e-06	92.6998	±	2.82665	7.29887	0.00133133	99.4449	0.555057	47.7622	0.847029	29.6888	0.276438	21.4255	99.9972	0.00278911	78.9596	11.5003	9.54014	15.4999	0.0490252	1268.07	±	27.8731
31	90571-02AE	9.6	1.96537	±	0.0014081	0.0366705	±	8.31e-05	0.0025534	±	5.03e-05	0.488071	±	0.0110553	0.0012247	±	1.03e-05	94.8919	±	4.48828	5.10673	0.00134946	99.075	0.925004	62.3445	0.473697	19.4483	0.374639	17.3589	99.9983	0.00166742	84.186	5.2533	10.5607	25.927	0.0396385	1277.07	±	43.3661
32	90571-02AF	9.9	3.33088	±	0.0018051	0.0610044	±	0.0001015	0.0052782	±	8.8e-05	1.26026	±	0.008749	0.0029431	±	1.72e-05	99.9409	±	6.07459	0.0577873	0.00131778	98.5643	1.43575	76.2874	0.0043948	9.34219	0.467978	13.8981	99.9989	0.00106873	88.6107	0.0419239	11.3474	40.4512	0.0237822	1347.59	±	57.7635
33	90571-02AG	10.2	1.24504	±	0.0017044	0.0226625	±	5.32e-05	0.0017872	±	3.42e-05	0.369312	±	0.0076761	0.0009259	±	9.81283e-06	92.9716	±	5.29025	7.02704	0.00131372	98.8674	1.13257	66.6905	0.589949	17.0196	0.405014	15.2949	99.9986	0.00135899	83.373	6.05711	10.5699	31.8115	0.0393695	1282.94	±	52.3105
34	90571-02AH	10.5	0.977001	±	0.0009274	0.0183435	±	5.89e-05	0.001829	±	4.93e-05	0.476854	±	0.0089125	0.0010789	±	1.13e-05	104.245	±	8.37653	-4.24632	0.00134584	98.1933	1.80669	82.6558	-0.273355	5.09192	0.511004	12.0146	99.9992	0.000846109	90.7525	-2.46492	11.7124	51.0946	0.0149944	1367.74	±	77.1607
35	90571-02AI	10.8	1.28373	±	0.0011063	0.0241943	±	6.2e-05	0.0031968	±	4.73e-05	0.911903	±	0.0155153	0.0020278	±	2.11e-05	108.349	±	11.9412	-8.34988	0.00133979	97.3805	2.6195	89.5865	-0.404083	1.26704	0.559096	8.99144	99.9994	0.000578742	91.4715	-3.38846	11.917	74.6996	0.0049856	1409.53	±	107.915
36	90571-02AJ	11.1	1.09815	±	0.0011073	0.0204826	±	6.23e-05	0.0030329	±	6.11e-05	0.872498	±	0.0101989	0.0019448	±	1.33e-05	108.07	±	12.769	-8.07135	0.00132128	97.0395	2.96048	90.1285	-0.352194	1.66451	0.563846	7.99531	99.9995	0.00051029	91.0328	-2.92151	11.8887	84.72	0.00736562	1420.65	±	116.301
37	90571-02AK	11.4	0.844349	±	0.0009111	0.0156049	±	5.34e-05	0.0018986	±	4.28e-05	0.548484	±	0.0090095	0.0011463	±	1.73e-05	121.503	±	11.1342	-21.5041	0.0013162	97.5572	2.44278	90.8658	-1.1525	-0.0619496	0.566218	9.78243	99.9994	0.000621734	97.4739	-10.1536	12.6797	69.5341	-0.000224053	1543	±	95.1762
38	90571-02AL	11	0.403553	±	0.0005582	0.0074823	±	3.97e-05	0.0008534	±	3.53e-05	0.237918	±	0.0050518	0.0005332	±	1.14e-05	106.057	±	10.9382	-6.05837	0.00132359	97.7901	2.2099	87.897	-0.345253	1.44169	0.546421	10.4601	99.9993	0.000688892	91.1149	-2.93929	11.8244	62.7554	0.00487633	1400.53	±	100.664
39	90571-02AM	12	0.858644	±	0.0016049	0.0162912	±	5.09e-05	0.0021863	±	4.25e-05	0.64128	±	0.0120011	0.0014705	±	1.23e-05	100.484	±	12.5896	-0.485103	0.00134715	97.2642	2.73575	92.0363	-0.0229599	-1.43037	0.574899	8.84212	99.9994	0.000553486	88.6251	-0.181576	11.5565	78.1082	-0.00572334	1331.86	±	118.115
40	90571-02AN	12.5	0.919516	±	0.0009865	0.0168817	±	5.81e-05	0.0024101	±	4.82e-05	0.698393	±	0.011273	0.0016054	±	1.23e-05	99.5886	±	12.5489	0.410066	0.0013017	97.1248	2.87519	90.8366	0.0188543	0.276722	0.567961	8.29987	99.9995	0.00052589	88.3213	0.150558	11.5282	82.2069	0.00117959	1355.92	±	120.25
41	90571-02AO	13	1.20936	±	0.0011051	0.0224254	±	5.89e-05	0.0030726	±	5.9e-05	0.847191	±	0.0085961	0.0020042	±	2.02e-05	92.7044	±	11.3871	7.29428	0.00131811	97.3744	2.62557	86.5892	0.345993	3.85397	0.540417	8.6704	99.9994	0.000577367	85.9768	2.82146	11.2017	74.8775	0.0157263	1277.24	±	112.534
42	90571-02AP	13.5	1.08854	±	0.0010056	0.019968	±	5.71e-05	0.0024614	±	4.08e-05	0.663757	±	0.0107421	0.0015504	±	1.04e-05	97.0485	±	10.0949	2.95024	0.00130817	97.6898	2.31024	84.9294	0.157236	4.7163	0.528543	9.66855	99.9993	0.000658298	87.3271	1.3278	11.3451	65.6719	0.0172583	1326.76	±	97.8201
43	90571-02AQ	14	1.43238	±	0.0015042	0.0261814	±	7.19e-05	0.003044	±	4.69e-05	0.778945	±	0.0104057	0.0018192	±	1.24e-05	97.8783	±	8.88825	2.12036	0.00130672	97.9323	2.06774	80.8171	0.120242	8.28484	0.501551	10.2762	99.9993	0.000737326	87.5831	1.0702	11.3467	58.633	0.0285238	1335.83	±	85.7966
44	90571-02AR	15	2.6513	±	0.0017046	0.0505008	±	8.99e-05	0.0112122	±	0.0001607	3.34849	±	0.0361449	0.0072216	±	2.43e-05	124.412	±	19.923	-24.4131	0.00132639	95.3918	4.60823	92.9408	-0.695705	1.92775	0.585347	5.24177	99.9997	0.000322261	93.458	-5.74546	12.2874	134.152	0.0130116	1559.6	±	167.348
Isotope abundances given in Volts at time-zero (spectrometer sensitivity is ~6.5 x 10-15 moles/Volt), and corrected for 37Ar and 39Ar decay, half lives of 34.95 days and 269 years, respectively.
Isotope sources calculated using the reactor constants in Renne et al. (2005).
Corrections were not made for cosmogenic 40Ar.
Ages calculated using the decay constants and standard calibration of Renne et al. (2011) and calculated relative to Hb3gr fluence monitor (1081 Ma, Renne et al. 2011).
40K/39K isotope abundance used is 0.01167 ± 0.0000205 (Steiger and Jäger 1977).

## Sheet: MIL3
COMPLETE 40Ar/39Ar INCREMENTAL HEATING RESULTS
#	Run ID	Laser Power	40Ar ± 1s			39Ar ± 1s			38Ar ± 1s			37Ar ± 1s			36Ar ± 1s			40Ar* (%) ± 1s			40Aratm (%)	40ArK (%)	39ArK (%)	39ArCa (%)	38Arcos (%)	38Aratm (%)	38ArCl (%)	38ArCa (%)	38ArK (%)	37ArCa (%)	37ArK (%)	36Arcos (%)	36Aratm (%)	36ArCa (%)	Ca/K	Cl/K	Apparent Age ± 1s (Ma)
MIL 03346 groundmass								J =	0.019996	±	6e-05
1	90571-03A	5	-0.0003972	±	0.0001946	-4.29876e-06	±	2.6e-05	1.2e-05	±	2.27e-05	0.0021885	±	0.002429	1.43e-05	±	4.89912e-06	3779.71	±	3289.17	-3679.71	0.00106959	135.383	-35.3825	55.9819	14.6783	29.574	0.357455	-0.591676	100	-5.95672e-05	30.4261	65.5183	4.05561	-725.77	-1.76841	7164.62	±	8042.87
2	90571-03B	6	6.75e-05	±	0.0001829	2.84e-05	±	2.49e-05	6.447e-06	±	2.14e-05	0.0112159	±	0.0023066	8.17754e-06	±	4.83355e-06	39791.5	±	108966	-39691.5	0.0222839	72.5527	27.4473	535.97	-50.0815	-393.198	3.40983	3.89919	100	4.11515e-05	273.671	-210.017	36.3461	1050.56	-3.56775	5963.76	±	2218.6
3	90571-03C	6.5	1.63513	±	0.0012044	0.0246106	±	6.18e-05	0.000567	±	3.64e-05	0.0277564	±	0.0025572	0.0001908	±	6.02411e-06	91.5578	±	1.1513	8.44111	0.00109787	99.9216	0.0783681	25.8612	2.93361	18.1968	0.095929	52.9125	99.9802	0.0198457	49.7744	46.3713	3.85429	2.17797	0.0121673	1439.84	±	12.7088
4	90571-03D	6.6	1.52396	±	0.0020028	0.0229992	±	6.28e-05	0.0004984	±	3.4e-05	0.0284324	±	0.0025588	0.0001338	±	5.83415e-06	96.6669	±	1.17191	3.33204	0.00110075	99.9141	0.0859027	29.0325	1.22783	13.3781	0.111793	56.2498	99.9819	0.018104	70.042	24.3278	5.63021	2.38755	0.00841453	1491.74	±	12.5528
5	90571-03E	6.7	1.71279	±	0.0022031	0.0263728	±	6.51e-05	0.0005774	±	3.47e-05	0.0371487	±	0.0026101	0.0001472	±	6.08421e-06	98.1005	±	1.08266	1.89834	0.00112292	99.9021	0.0978821	31.1566	0.67863	12.3696	0.126082	55.6691	99.9841	0.0158868	79.1539	14.1594	6.68671	2.72083	0.00786137	1486.45	±	11.3873
6	90571-03F	6.8	1.54968	±	0.0018049	0.0239487	±	5.79e-05	0.0004993	±	2.9e-05	0.031995	±	0.0033153	0.000141	±	6.48991e-06	96.9607	±	1.36566	3.03818	0.00112709	99.9072	0.0928351	31.6475	1.13639	8.62812	0.125575	58.4624	99.9832	0.0167511	72.5829	21.4049	6.01224	2.58041	0.00522152	1470.9	±	14.3375
7	90571-03G	6.9	7.75783	±	0.0052018	0.125209	±	0.0001513	0.0024048	±	6.65e-05	0.140255	±	0.0039702	0.0006116	±	9.52158e-06	98.1251	±	0.590137	1.87376	0.00117728	99.9222	0.0778357	30.8992	0.728463	4.78645	0.11429	63.4716	99.98	0.0199815	78.6885	15.2357	6.07588	2.16316	0.00266803	1439.28	±	6.05169
8	90571-03H	7	5.71963	±	0.0049017	0.0929643	±	0.0001214	0.0017519	±	6.61e-05	0.10419	±	0.0034043	0.0004591	±	8.94668e-06	97.9787	±	0.638202	2.02013	0.00118559	99.9221	0.0778764	31.5012	0.794823	2.89871	0.116542	64.6887	99.98	0.0199711	77.8542	16.133	6.01279	2.1643	0.00158538	1430.85	±	6.51309
9	90571-03I	7.1	10.9119	±	0.0039022	0.179672	±	0.0001911	0.0032319	±	0.0001112	0.194726	±	0.0038674	0.0008538	±	1.23e-05	98.2171	±	0.545845	1.78173	0.00120109	99.9247	0.0753077	32.3705	0.724967	-0.986338	0.118068	67.7728	99.9793	0.0206527	79.3604	14.597	6.04261	2.09285	-0.000514906	1420.43	±	5.55627
10	90571-03J	7.2	7.9383	±	0.0032031	0.132043	±	0.0001413	0.002723	±	5.3e-05	0.13955	±	0.004028	0.0006131	±	1.03e-05	98.3235	±	0.589176	1.67524	0.00121337	99.9266	0.0734359	27.8339	0.58856	12.3606	0.100426	59.1165	99.9788	0.0211794	80.0652	13.9043	6.03051	2.0408	0.00739753	1411.51	±	5.95119
11	90571-03K	7.3	5.48811	±	0.0024054	0.0918358	±	0.0001316	0.0018259	±	5.37e-05	0.0884687	±	0.0031987	0.0004264	±	8.16586e-06	97.7629	±	0.614663	2.23583	0.00122073	99.9331	0.0669363	27.4235	0.809875	10.3514	0.0949441	61.3203	99.9768	0.023237	76.0563	18.4468	5.49689	1.86005	0.00597246	1400	±	6.26996
12	90571-03L	7.4	2.91254	±	0.0029058	0.0483998	±	9.96e-05	0.0010087	±	3.98e-05	0.0531502	±	0.0030856	0.0002436	±	7.15109e-06	97.5559	±	0.85648	2.44287	0.00121217	99.9237	0.0763058	28.1507	0.850047	12.4022	0.103255	58.4938	99.9796	0.0203824	75.4965	18.7228	5.78076	2.12061	0.00750147	1404.81	±	8.75394
13	90571-03M	7.5	8.35965	±	0.0059038	0.140374	±	0.0001523	0.0032324	±	8.59e-05	0.154832	±	0.0041486	0.0007005	±	1.05e-05	97.6712	±	0.603165	2.32758	0.00122487	99.9234	0.0766425	25.543	0.72544	20.697	0.093865	52.9407	99.9797	0.0202928	76.3381	17.8058	5.85613	2.12998	0.0138317	1395.8	±	6.05952
14	90571-03N	7.6	5.92462	±	0.0027082	0.10013	±	0.0001326	0.0021388	±	7.26e-05	0.100095	±	0.0039873	0.0004539	±	9.60178e-06	98.2466	±	0.656322	1.75221	0.00123289	99.9305	0.0694607	26.0487	0.584937	16.1991	0.0917071	57.0756	99.9776	0.0223921	79.4965	14.6609	5.84255	1.93025	0.0100415	1395.16	±	6.60694
15	90571-03O	7.7	6.28493	±	0.0053033	0.105583	±	0.0001223	0.0021233	±	5.38e-05	0.110826	±	0.0032683	0.0005099	±	8.81779e-06	97.7763	±	0.612	2.22246	0.00122546	99.9271	0.0729357	28.4323	0.792787	10.0514	0.102281	60.6213	99.9787	0.0213247	76.6815	17.56	5.75851	2.02689	0.00586622	1396.37	±	6.13818
16	90571-03P	7.8	5.12307	±	0.0024053	0.0872855	±	0.0001318	0.0018333	±	4.47e-05	0.0949151	±	0.0032478	0.0004222	±	8.12371e-06	97.9509	±	0.655418	2.04786	0.00124282	99.9244	0.0755594	27.7757	0.689652	13.3915	0.101454	58.0417	99.9794	0.0205838	78.1148	15.929	5.95626	2.09986	0.00816294	1384.46	±	6.62017
17	90571-03Q	7.9	7.39231	±	0.0044029	0.125954	±	0.000132	0.0028762	±	5.55e-05	0.166796	±	0.0041276	0.0006679	±	1.02e-05	98.1333	±	0.663365	1.86544	0.00124266	99.908	0.0920208	28.7365	0.577798	17.1954	0.113645	53.3767	99.9831	0.0168995	80.1482	13.2351	6.61678	2.55775	0.0113977	1386.38	±	6.59823
18	90571-03R	8	5.55472	±	0.0024059	0.0952181	±	0.0001127	0.0021341	±	6.9e-05	0.108327	±	0.0035415	0.0004751	±	8.75388e-06	97.8336	±	0.664576	2.16519	0.00125036	99.9209	0.0790525	26.7187	0.679169	18.1124	0.0994698	54.3903	99.9803	0.0196738	77.7316	16.2274	6.04103	2.19701	0.0117818	1377.46	±	6.63457
19	90571-03S	8.1	4.05499	±	0.0036048	0.0695958	±	0.0001922	0.0016948	±	4.02e-05	0.102962	±	0.0041379	0.0003763	±	1.14e-05	98.778	±	0.898294	1.22073	0.00125161	99.8972	0.102804	28.9056	0.351986	20.5764	0.119055	50.047	99.9849	0.0151255	84.3179	8.43241	7.24973	2.85779	0.0145462	1385.78	±	9.16
20	90571-03T	8.2	4.79399	±	0.0045038	0.0829485	±	0.0001823	0.0021439	±	9.86e-05	0.194929	±	0.0048031	0.0006414	±	1.34e-05	97.7927	±	1.03779	2.206	0.00126103	99.8367	0.163309	37.5904	0.594472	14.5116	0.178191	47.1253	99.9905	0.00951637	81.3778	10.5694	8.05288	4.54248	0.0108948	1368.89	±	10.3661
21	90571-03U	8.3	3.32428	±	0.0019072	0.0575542	±	0.000162	0.0014595	±	8.54e-05	0.174095	±	0.0045462	0.0005224	±	1.33e-05	98.2736	±	1.30598	1.72509	0.00126121	99.7898	0.210214	46.4954	0.47352	4.78877	0.233779	48.0086	99.9926	0.00738968	84.1324	7.03691	8.83072	5.84989	0.00352909	1373.46	±	13.0602
22	90571-03V	8.4	2.03117	±	0.0023049	0.0349676	±	0.0001219	0.0009333	±	3.96e-05	0.0886218	±	0.0038052	0.0002546	±	9.7786e-06	100.134	±	1.3954	-0.13499	0.00125452	99.8239	0.176125	38.5255	-0.0354046	15.695	0.186096	45.6288	99.9912	0.00882283	91.467	-0.690344	9.22337	4.89959	0.0121697	1396.75	±	13.9352
23	90571-03W	8.5	2.02066	±	0.0025042	0.0352191	±	7.64e-05	0.000896	±	3.46e-05	0.0563703	±	0.0029397	0.0002255	±	6.5025e-06	96.7945	±	1.08028	3.20424	0.00127094	99.8888	0.111223	29.1326	0.870849	21.972	0.123293	47.9012	99.986	0.0139795	74.971	18.4055	6.62352	3.09209	0.0162286	1351.59	±	10.7587
24	90571-03X	8.6	1.8809	±	0.0013084	0.0329574	±	6.84e-05	0.0009466	±	3.92e-05	0.0773158	±	0.0035922	0.0002415	±	1e-05	98.8464	±	1.42998	1.15237	0.00127703	99.837	0.163027	33.7832	0.275945	23.3738	0.160072	42.407	99.9905	0.00953288	85.7636	5.75327	8.48312	4.53461	0.0195006	1367.07	±	14.0033
25	90571-03Y	8.7	2.61989	±	0.0017074	0.0460014	±	9.18e-05	0.0017997	±	5.57e-05	0.227586	±	0.005174	0.0005983	±	1.24e-05	99.3672	±	1.84877	0.631499	0.00127737	99.6562	0.343827	45.2456	0.110787	23.319	0.247846	31.0767	99.9955	0.00451209	88.1476	1.7726	10.0798	9.58094	0.0265481	1371.86	±	17.9808
26	90571-03Z	8.8	1.76998	±	0.0014111	0.0310623	±	6.97e-05	0.0009521	±	3.36e-05	0.0853694	±	0.0036859	0.0002885	±	7.04806e-06	95.9638	±	1.42235	4.03489	0.00127867	99.809	0.190993	35.693	0.903965	23.5008	0.175728	39.7265	99.9919	0.00813484	76.2908	15.8683	7.84092	5.31399	0.0209296	1337.67	±	14.1512
27	90571-03AA	8.8	1.42423	±	0.0023067	0.0255634	±	7.06e-05	0.0011819	±	4.37e-05	0.17887	±	0.0041887	0.0004396	±	1.16e-05	100.57	±	2.68927	-0.570894	0.0013039	99.5137	0.486285	51.9169	-0.0829067	21.6103	0.29662	26.2591	99.9968	0.00318575	90.4033	-1.18564	10.7823	13.57	0.0291164	1363.68	±	25.6979
28	90571-03AB	8.9	0.829027	±	0.0008249	0.0146332	±	5.37e-05	0.0003365	±	5.57e-05	0.0511349	±	0.0031181	0.0001581	±	6.23839e-06	96.4004	±	2.19885	3.59836	0.0012854	99.7572	0.242848	57.5513	1.06837	-11.8421	0.297825	52.9247	99.9936	0.00639461	79.3343	12.0953	8.57045	6.76026	-0.00791643	1336.99	±	21.8129
29	90571-03AC	9	0.984922	±	0.0011091	0.0175138	±	4.95e-05	0.0006551	±	3.64e-05	0.0467009	±	0.0034031	0.0001693	±	6.7947e-06	94.3474	±	2.01957	5.65135	0.00129567	99.8147	0.185308	28.5761	1.02395	37.7045	0.139713	32.5557	99.9916	0.00838489	71.6154	21.0752	7.30933	5.15551	0.0409755	1309.32	±	20.0894
30	90571-03AD	9.3	2.18201	±	0.0016057	0.0397808	±	8.85e-05	0.0024743	±	5.58e-05	0.438617	±	0.0089456	0.0010501	±	1.14e-05	100.263	±	3.64267	-0.264522	0.00132068	99.2337	0.766281	58.5057	-0.0281125	21.7106	0.34744	19.4644	99.998	0.00201602	89.2838	-0.352341	11.0686	21.4438	0.039463	1348.56	±	34.5906
31	90571-03AE	9.6	1.56828	±	0.0012086	0.0284471	±	0.0001114	0.0018447	±	4.57e-05	0.371902	±	0.0106087	0.0008423	±	9.80379e-06	104.245	±	4.54013	-4.24673	0.00131212	99.0914	0.90859	65.8245	-0.435096	15.5728	0.395141	18.6427	99.9983	0.00169783	93.3682	-5.06857	11.7004	25.4627	0.0295541	1392.23	±	42.4544
32	90571-03AF	9.9	1.82568	±	0.001409	0.0336714	±	7.16e-05	0.0025954	±	5.58e-05	0.569724	±	0.0079166	0.0013287	±	1.25e-05	100.943	±	5.26712	-0.944714	0.00133052	98.8241	1.17593	70.7204	-0.0800854	13.2879	0.43024	15.6415	99.9987	0.0013083	89.4695	-0.832094	11.3626	33.044	0.0300562	1347.93	±	49.616
33	90571-03AG	10.2	1.50098	±	0.0012104	0.027867	±	0.0001118	0.0029985	±	5.78e-05	0.788002	±	0.0101048	0.0018246	±	1.34e-05	99.8202	±	8.58212	0.178452	0.00132867	98.0347	1.96525	83.1121	0.0107653	5.24667	0.515081	11.1154	99.9992	0.000776589	88.4613	0.0941029	11.4446	55.6687	0.0167	1338.65	±	81.4009
34	90571-03AH	10.5	1.29038	±	0.0012081	0.0240996	±	6.62e-05	0.0023169	±	5.53e-05	0.602481	±	0.0097202	0.0013469	±	1.14e-05	106.204	±	7.82792	-6.20492	0.00133969	98.2625	1.73746	82.5392	-0.416465	4.89808	0.509669	12.4695	99.9991	0.000880445	91.957	-3.8106	11.8536	49.102	0.0138974	1390.11	±	71.5386
35	90571-03AI	10.8	1.40997	±	0.0018043	0.0267035	±	7.08e-05	0.0036588	±	5.69e-05	1.09563	±	0.0130138	0.0023808	±	1.53e-05	114.858	±	12.4947	-14.8594	0.00134313	97.1485	2.85154	93.8841	-0.690092	-2.43115	0.586922	8.65018	99.9995	0.000530379	93.446	-5.64111	12.1951	81.511	-0.00994361	1464.9	±	109.238
36	90571-03AJ	11.1	1.30426	±	0.0012054	0.0242265	±	6e-05	0.0033818	±	6.95e-05	0.960275	±	0.0143077	0.0021426	±	1.33e-05	107.546	±	12.0246	-7.54776	0.00131862	97.2452	2.75478	89.0858	-0.350805	2.20942	0.556546	8.49906	99.9995	0.000549555	91.0684	-2.9452	11.8768	78.6668	0.00919742	1417.86	±	109.902
37	90571-03AK	11.4	0.800354	±	0.0008968	0.0149755	±	5.33e-05	0.0019421	±	4.63e-05	0.523173	±	0.0088172	0.0011412	±	1.23e-05	112.35	±	11.009	-12.3514	0.00133275	97.572	2.42799	84.743	-0.613423	6.16346	0.527992	9.17899	99.9994	0.000625618	93.4042	-5.5528	12.1486	69.1025	0.0237568	1450.57	±	97.8081
38	90571-03AL	11	0.346119	±	0.0006796	0.0063704	±	3.61e-05	0.0006826	±	3.84e-05	0.164625	±	0.0042018	0.0003455	±	7.4987e-06	116.319	±	9.08301	-16.3206	0.00131945	98.204	1.79601	76.4729	-0.997309	12.8705	0.472695	11.1812	99.9991	0.000851234	97.854	-10.4807	12.6267	50.787	0.0407251	1495.65	±	79.6449
39	90571-03AM	12	0.926714	±	0.0017046	0.0172872	±	6.2e-05	0.0022557	±	4.19e-05	0.611469	±	0.0105291	0.0012961	±	1.34e-05	118.754	±	11.1135	-18.7552	0.00132829	97.5417	2.45828	85.2514	-0.928582	6.02589	0.531308	9.11997	99.9994	0.000617716	96.0942	-8.59617	12.502	69.9865	0.0233768	1509.98	±	95.861
40	90571-03AN	12.5	1.04389	±	0.0008787	0.0197552	±	5.25e-05	0.0030015	±	4.83e-05	0.858133	±	0.0278765	0.0018768	±	1.44e-05	113.633	±	15.4463	-13.6341	0.00133979	96.981	3.01895	89.5396	-0.571444	2.68411	0.560364	7.78735	99.9995	0.000500105	92.7445	-4.86112	12.1166	86.4453	0.0121946	1456.64	±	135.993
41	90571-03AO	13	1.48188	±	0.0022028	0.0283952	±	7.3e-05	0.0048918	±	7.08e-05	1.54257	±	0.0204753	0.0032774	±	1.72e-05	126.193	±	16.7301	-26.1944	0.00134598	96.2244	3.77557	98.3961	-0.956284	-4.87218	0.618059	6.8143	99.9996	0.000396766	95.1196	-7.59221	12.4727	108.961	-0.0252965	1559.14	±	138.53
42	90571-03AP	13.5	0.99871	±	0.0010052	0.0188174	±	5.99e-05	0.0035027	±	5.49e-05	1.10973	±	0.0178875	0.0023101	±	1.52e-05	135.002	±	18.1944	-35.0035	0.00131907	95.9013	4.09866	98.7448	-1.20276	-4.44857	0.620969	6.28552	99.9996	0.000364262	96.9704	-9.70052	12.7301	118.683	-0.0250401	1652.42	±	146.019
43	90571-03AQ	14	0.623833	±	0.000826	0.012314	±	4.8e-05	0.0032519	±	8.02e-05	1.13433	±	0.0129061	0.0024444	±	1.52e-05	133.708	±	28.8382	-33.7092	0.00134871	93.5979	6.40212	108.188	-0.779315	-12.4164	0.683687	4.32402	99.9998	0.000227601	93.2173	-5.51468	12.2974	189.946	-0.101593	1618.14	±	230.661
44	90571-03AR	15	0.818234	±	0.0013047	0.0183955	±	6.36e-05	0.0126238	±	8.93e-05	4.66617	±	0.0353708	0.0094521	±	4.11e-05	310.793	±	88.4332	-210.794	0.00135186	82.3708	17.6292	114.006	-1.64657	-14.5487	0.724479	1.46438	99.9999	7.27399e-05	98.6151	-11.6972	13.0821	594.337	-0.351501	2660.75	±	396.442
Isotope abundances given in Volts at time-zero (spectrometer sensitivity is ~6.5 x 10-15 moles/Volt), and corrected for 37Ar and 39Ar decay, half lives of 34.95 days and 269 years, respectively.
Isotope sources calculated using the reactor constants in Renne et al. (2005).
Corrections were not made for cosmogenic 40Ar.
Ages calculated using the decay constants and standard calibration of Renne et al. (2011) and calculated relative to Hb3gr fluence monitor (1081 Ma, Renne et al. 2011).
40K/39K isotope abundance used is 0.01167 ± 0.0000205 (Steiger and Jäger 1977).

## Sheet: Nak1
COMPLETE 40Ar/39Ar INCREMENTAL HEATING RESULTS
#	Run ID	Laser Power	40Ar ± 1s			39Ar ± 1s			38Ar ± 1s			37Ar ± 1s			36Ar ± 1s			40Ar* (%) ± 1s			40Aratm (%)	40ArK (%)	39ArK (%)	39ArCa (%)	38Arcos (%)	38Aratm (%)	38ArCl (%)	38ArCa (%)	38ArK (%)	37ArCa (%)	37ArK (%)	36Arcos (%)	36Aratm (%)	36ArCa (%)	Ca/K	Cl/K	Apparent Age ± 1s (Ma)
Nakhla groundmass								J =	0.020047	±	6e-05
1	90567-01A	5	0.000176	±	0.0001811	-5.16e-05	±	2.45e-05	2.59e-05	±	2.43e-05	0.005234	±	0.0017571	8.51352e-07	±	4.01532e-06	8898.14	±	10236.3	-8798.11	-0.0229111	107.05	-7.04969	55.9799	-7.20503	53.4309	0.396087	-2.60193	100	-0.000236401	1103	-1165.92	162.919	-182.876	-0.726533	#NUM!	±	1491.13
2	90567-01B	6	0.000266	±	0.0001723	-7.92e-05	±	2.33e-05	2.18e-05	±	2.19e-05	0.0001684	±	0.0015309	-5.10613e-06	±	4.02438e-06	3231.33	±	3321.81	-3131.31	-0.0217675	100.148	-0.147791	1.33525	-4.60452	107.693	0.0151421	-4.43884	100.011	-0.0105505	-3.69215	104.566	-0.874062	-4.09806	-0.858372	#NUM!	±	2850.16
3	90567-01C	6.5	0.199805	±	0.0011058	0.0047969	±	3.55e-05	0.0002177	±	3.01e-05	0.0078294	±	0.0017705	4.96e-05	±	5.24565e-06	79.4349	±	5.71986	20.5633	0.00175059	99.8866	0.113421	15.0272	2.27444	55.7764	0.0704801	26.8515	99.9863	0.0137084	42.7176	53.1	4.18247	3.15325	0.0734918	920.81	±	52.0787
4	90567-01D	6.6	0.264352	±	0.0005719	0.0065324	±	3.35e-05	0.0002728	±	2.92e-05	0.0037906	±	0.0018095	4.69e-05	±	5.1762e-06	82.6075	±	5.61815	17.3907	0.00180318	99.9597	0.0403137	9.29693	2.0309	59.4429	0.027224	29.202	99.9614	0.0385867	35.0238	62.8352	2.14098	1.11995	0.0720186	927.73	±	49.4709
5	90567-01E	6.7	1.08022	±	0.0011051	0.022463	±	5.51e-05	0.0005864	±	3.6e-05	0.0168148	±	0.0017396	0.0001352	±	5.46598e-06	90.2614	±	1.3784	9.73709	0.00151724	99.948	0.052009	16.6726	2.16162	34.3998	0.0561855	46.7098	99.9701	0.0299087	46.8352	49.8699	3.29481	1.44503	0.0260559	1132.38	±	12.9878
6	90567-01F	6.8	0.600633	±	0.0008204	0.0119961	±	4.78e-05	0.00033	±	3.58e-05	0.0076532	±	0.0017167	4.91e-05	±	5.0797e-06	95.9323	±	2.31399	4.06622	0.00145734	99.9557	0.0443236	14.6993	0.891905	40.0338	0.0454394	44.3296	99.9649	0.0350956	63.9854	31.8855	4.1291	1.2314	0.0319515	1219.86	±	21.6566
7	90567-01G	6.9	0.71614	±	0.0008406	0.0135355	±	5.18e-05	0.0003083	±	2.36e-05	0.008113	±	0.0016313	6.17e-05	±	5.25909e-06	94.5425	±	1.9576	5.45611	0.00137917	99.9584	0.0416418	17.2799	1.52736	27.601	0.0515587	53.5402	99.9626	0.037356	55.9219	40.5949	3.48321	1.15687	0.0182391	1256.2	±	19.038
8	90567-01H	7	1.31524	±	0.0011063	0.0233734	±	5.49e-05	0.0004898	±	2.7e-05	0.0213394	±	0.0016364	9.31e-05	±	5.3972e-06	98.266	±	1.04088	1.73268	0.00129647	99.9366	0.0634364	22.9608	0.560712	18.2113	0.0853715	58.1818	99.9755	0.0245195	78.2364	15.691	6.07256	1.76273	0.0110742	1349.45	±	10.2863
9	90567-01I	7.1	1.66317	±	0.0013056	0.0290199	±	7.62e-05	0.0007293	±	3.62e-05	0.0164716	±	0.0017177	0.000118	±	6.17679e-06	96.1221	±	1.00033	3.87658	0.00127324	99.9606	0.0394324	15.3081	1.0654	35.0558	0.0442501	48.5264	99.9606	0.0394491	61.2772	35.0251	3.69767	1.09546	0.0255587	1345.67	±	10.1596
10	90567-01J	7.2	1.15471	±	0.0010098	0.0203522	±	6.08e-05	0.0005045	±	3.22e-05	0.0124341	±	0.0017702	7.52e-05	±	5.48813e-06	97.3508	±	1.31663	2.64796	0.0012861	99.9576	0.0424452	16.008	0.730395	34.0178	0.0482892	49.1955	99.9634	0.0366489	69.5558	26.0641	4.38009	1.17919	0.0244646	1348.19	±	13.1362
11	90567-01K	7.3	3.71652	±	0.0019051	0.0637715	±	9.52e-05	0.001313	±	4.19e-05	0.046927	±	0.0020675	0.0002467	±	6.64997e-06	97.6496	±	0.6	2.34915	0.00125196	99.9489	0.0511268	20.9672	0.801339	18.9372	0.0700297	59.2243	99.9696	0.0304249	72.275	22.6858	5.03927	1.42051	0.0113129	1376.87	±	6.07436
12	90567-01L	7.4	2.50962	±	0.001505	0.0430183	±	9.42e-05	0.0008418	±	3.99e-05	0.0309313	±	0.0019228	0.0001656	±	6.1832e-06	97.6094	±	0.728887	2.38935	0.00125069	99.95	0.0499568	21.8206	0.858446	14.9347	0.0719963	62.3142	99.9689	0.0311377	71.8403	23.2115	4.94821	1.38798	0.00847947	1377.45	±	7.48021
13	90567-01M	7.5	2.81072	±	0.0015051	0.0482573	±	8.56e-05	0.0009492	±	4.39e-05	0.0362063	±	0.0017419	0.0001647	±	6.60602e-06	98.9484	±	0.662133	1.05036	0.00125269	99.9479	0.0521286	22.152	0.374829	15.406	0.07474	61.9924	99.9702	0.0298401	82.6857	11.4905	5.8238	1.44836	0.00879242	1389.08	±	6.69165
14	90567-01N	7.6	3.99048	±	0.0028036	0.0680975	±	0.0001118	0.0013369	±	5.89e-05	0.0490925	±	0.0021177	0.0002382	±	7.23803e-06	98.5665	±	0.591568	1.43228	0.00124512	99.9499	0.050088	21.7766	0.515214	15.5244	0.0719511	62.1119	99.9689	0.0310561	79.159	15.3811	5.4599	1.39163	0.00884295	1391.21	±	6.00004
15	90567-01O	7.7	3.13197	±	0.0021042	0.0540252	±	0.0001016	0.0011127	±	4.58e-05	0.0429329	±	0.0018536	0.0001971	±	6.44672e-06	98.5579	±	0.635627	1.4408	0.00125852	99.9448	0.0552149	21.7577	0.488739	18.4757	0.0756042	59.2023	99.9718	0.0281718	79.5532	14.6761	5.77068	1.53415	0.0110413	1380.76	±	6.45461
16	90567-01P	7.8	2.86715	±	0.0016064	0.0491957	±	8.59e-05	0.000972	±	4.52e-05	0.0398209	±	0.0020574	0.00019	±	6.81272e-06	98.0751	±	0.699744	1.92364	0.00125186	99.9438	0.0562404	22.8892	0.68382	14.6337	0.0802751	61.713	99.9723	0.0276579	75.8397	18.6079	5.55243	1.56266	0.0083895	1381.14	±	7.07362
17	90567-01Q	7.9	4.73762	±	0.0024061	0.0807185	±	0.0001021	0.0015474	±	5.25e-05	0.0650427	±	0.0022197	0.000294	±	7.69143e-06	98.6529	±	0.561552	1.34588	0.00124306	99.944	0.0559873	23.5376	0.496591	12.279	0.0823628	63.6044	99.9722	0.027783	80.2363	13.9026	5.86106	1.55563	0.00683021	1393.66	±	5.64408
18	90567-01R	8	5.0479	±	0.0026057	0.0861107	±	0.0001218	0.0017051	±	6.46e-05	0.0773039	±	0.0026369	0.0003307	±	6.88061e-06	98.6313	±	0.570817	1.36748	0.00124451	99.9376	0.0623765	24.0841	0.487884	13.7654	0.0888381	61.5738	99.9751	0.0249363	80.4264	13.3806	6.19305	1.73326	0.00790951	1392.32	±	5.76329
19	90567-01S	8.1	3.67023	±	0.0021051	0.0630477	±	9.66e-05	0.0013251	±	4.3e-05	0.0660949	±	0.0023629	0.0002832	±	7.48994e-06	97.7129	±	0.671992	2.28589	0.00125309	99.9272	0.0728435	24.6914	0.763015	16.443	0.0977423	58.0048	99.9786	0.0213517	74.8263	18.9902	6.18341	2.02432	0.0100294	1376.62	±	6.76763
20	90567-01T	8.2	3.6283	±	0.0017059	0.06184	±	0.0001004	0.0013097	±	4.58e-05	0.0520225	±	0.0020249	0.0002349	±	7.05686e-06	98.4324	±	0.613645	1.56631	0.00124347	99.9415	0.0584509	21.7728	0.522928	20.0555	0.0778323	57.571	99.9734	0.0266117	78.6241	15.5086	5.8673	1.62412	0.012325	1391.17	±	6.23531
21	90567-01U	8.3	4.0141	±	0.0019065	0.0685709	±	0.0001116	0.0014259	±	4.21e-05	0.0695515	±	0.002483	0.0002772	±	7.51617e-06	98.7349	±	0.642584	1.26387	0.00124614	99.9295	0.0704783	24.4991	0.42878	16.3486	0.0955823	58.6279	99.9779	0.0220686	81.6204	11.732	6.64758	1.95855	0.00986585	1392.07	±	6.49706
22	90567-01V	8.4	4.68855	±	0.0024037	0.0799582	±	0.0001113	0.0018079	±	5.45e-05	0.0884553	±	0.0021258	0.000358	±	8.74764e-06	98.0876	±	0.622837	1.91118	0.00124398	99.9231	0.0768702	23.6672	0.597308	21.724	0.0958777	53.9156	99.9798	0.0202327	77.4089	16.0447	6.54634	2.13631	0.0142555	1387.37	±	6.27764
23	90567-01W	8.5	2.98889	±	0.001505	0.0511656	±	9.15e-05	0.00121	±	5.16e-05	0.0976027	±	0.0025639	0.0003127	±	7.09785e-06	98.1535	±	0.872462	1.84528	0.001248	99.8674	0.132562	32.0901	0.549314	15.6824	0.158082	51.5201	99.9883	0.011727	80.4233	11.3063	8.27045	3.68609	0.0107695	1384.9	±	8.75946
24	90567-01X	8.6	3.01146	±	0.0030029	0.0516748	±	9.1e-05	0.0012331	±	4.79e-05	0.0743671	±	0.0026085	0.000295	±	8.03904e-06	96.627	±	0.833281	3.37176	0.00125138	99.9	0.100004	26.3206	0.992359	21.4942	0.118187	51.0747	99.9845	0.0155493	71.2564	22.0642	6.6794	2.77988	0.0148893	1367.19	±	8.38912
25	90567-01Y	8.7	3.17891	±	0.0019046	0.0543706	±	0.0001018	0.0011984	±	4.69e-05	0.0879097	±	0.0020872	0.0002984	±	6.83799e-06	98.2096	±	0.771633	1.78914	0.00124716	99.8876	0.112356	30.7471	0.571944	13.2488	0.143758	55.2884	99.9862	0.0138384	79.9761	12.218	7.80591	3.12362	0.00847812	1386.11	±	7.79829
26	90567-01Z	8.8	2.52907	±	0.0015046	0.0433338	±	8.67e-05	0.0010213	±	4.56e-05	0.0609631	±	0.0024751	0.0002193	±	6.87249e-06	98.1851	±	0.843474	1.81367	0.00124958	99.9022	0.0977588	26.2666	0.541252	21.3611	0.116977	51.714	99.9841	0.0159068	79.2267	13.4078	7.36555	2.7174	0.0146141	1383.99	±	8.51153
27	90567-01AA	8.8	2.47357	±	0.0017042	0.042398	±	8.67e-05	0.0009518	±	3.84e-05	0.0553719	±	0.0019573	0.0002108	±	6.30468e-06	97.8628	±	0.778214	2.13594	0.00125011	99.9092	0.0907516	26.3218	0.668961	18.5995	0.114005	54.2957	99.9829	0.017136	76.9739	16.0664	6.9597	2.52244	0.0121198	1380.4	±	7.89957
28	90567-01AB	8.9	2.22792	±	0.0028035	0.0381324	±	8.92e-05	0.0008686	±	4.23e-05	0.0466633	±	0.0021348	0.0001736	±	5.99939e-06	98.5301	±	0.831111	1.46868	0.00124838	99.915	0.0850328	24.9325	0.453985	20.9946	0.105277	53.5137	99.9817	0.0182893	80.7958	12.0824	7.12184	2.36335	0.0138803	1388.31	±	8.3956
29	90567-01AC	9	2.95459	±	0.0020049	0.0508765	±	0.0001019	0.0011949	±	4.52e-05	0.104928	±	0.002552	0.0003063	±	7.17315e-06	99.2495	±	0.910405	0.749205	0.00125522	99.8567	0.143321	34.1527	0.223254	13.5812	0.172095	51.8708	99.9892	0.0108456	86.2904	4.63262	9.07698	3.98571	0.00926345	1390.07	±	9.08355
30	90567-01AD	9.3	4.16071	±	0.0022037	0.0719436	±	0.0001113	0.002113	±	4.89e-05	0.212095	±	0.0031637	0.000631	±	9.18624e-06	96.7815	±	1.08522	3.21723	0.00125967	99.7951	0.204875	35.7313	0.763456	21.8549	0.196722	41.4536	99.9924	0.00758262	77.4947	13.5987	8.90663	5.70102	0.0186529	1362.4	±	10.8213
31	90567-01AE	9.6	3.97885	±	0.0024045	0.0690415	±	0.0001115	0.0022212	±	5.14e-05	0.290652	±	0.0052322	0.0007839	±	1.01e-05	96.8596	±	1.45217	3.13914	0.001263	99.7074	0.292567	43.5712	0.677663	17.6844	0.25646	37.8103	99.9947	0.00530532	79.9612	10.2137	9.82508	8.14836	0.0165477	1360.64	±	14.4075
32	90567-01AF	9.9	5.58205	±	0.002904	0.0967778	±	0.0001314	0.0030392	±	7.05e-05	0.386881	±	0.0049036	0.0010518	±	1.05e-05	96.9862	±	1.33437	3.0125	0.00126211	99.7222	0.277819	42.75	0.6668	17.593	0.249488	38.7408	99.9944	0.00558777	80.0045	10.2486	9.74688	7.73647	0.0160668	1362.57	±	13.223
33	90567-01AG	10.2	4.84965	±	0.0021043	0.0844243	±	0.0001212	0.0032413	±	7.04e-05	0.521307	±	0.007181	0.0012853	±	1.33e-05	97.4044	±	1.94967	2.59436	0.00126535	99.5709	0.429136	50.8033	0.467794	16.7734	0.315221	31.6403	99.9964	0.00361205	82.9772	6.27497	10.7478	11.9684	0.018756	1364.23	±	19.2183
34	90567-01AH	10.5	3.97967	±	0.0022037	0.069003	±	0.0001112	0.0025649	±	6.59e-05	0.384622	±	0.0068312	0.0010099	±	1.13e-05	95.637	±	1.8272	4.36171	0.00126083	99.6126	0.387376	47.9597	0.815581	18.2365	0.293902	32.6943	99.996	0.0040031	78.8899	11.018	10.0922	10.7992	0.0197346	1350.17	±	18.2314
35	90567-01AI	10.8	3.98474	±	0.0024037	0.0698506	±	0.0001312	0.0026358	±	5.31e-05	0.399555	±	0.005687	0.0009557	±	1.23e-05	99.0254	±	1.85736	0.973356	0.00127457	99.6025	0.397534	48.3245	0.177334	18.9987	0.297101	32.2024	99.9961	0.00390042	86.3199	2.60151	11.0786	11.0835	0.0208735	1373.11	±	18.126
36	90567-01AJ	11.1	3.54936	±	0.0020058	0.0618433	±	0.0001118	0.0028608	±	4.48e-05	0.499438	±	0.0081365	0.0012118	±	1.14e-05	96.2373	±	2.50374	3.76142	0.0012648	99.4387	0.561257	53.6402	0.562404	19.23	0.342167	26.2253	99.9972	0.00275813	82.0161	7.06231	10.9216	15.674	0.0259427	1353.13	±	24.8389
37	90567-01AK	11.4	2.80209	±	0.0018064	0.0493214	±	9.4e-05	0.0029215	±	4.84e-05	0.650779	±	0.0074505	0.0015538	±	1.23e-05	92.6437	±	3.88303	7.35498	0.00127314	99.083	0.917013	66.0216	0.850141	12.2843	0.436593	20.4074	99.9983	0.00168209	80.3987	8.50244	11.0988	25.7009	0.021297	1311.07	±	39.1211
38	90567-01AL	11	0.90406	±	0.0008208	0.015939	±	4.98e-05	0.0007088	±	3.93e-05	0.120361	±	0.0030847	0.000282	±	7.04267e-06	98.4334	±	2.76023	1.56534	0.00128027	99.4752	0.524806	52.5051	0.240611	19.631	0.332818	27.2905	99.997	0.00295078	85.4729	3.21686	11.3102	14.6506	0.02545	1363.07	±	26.9991
39	90567-01AM	12	1.22597	±	0.0009779	0.0220842	±	6.01e-05	0.0014392	±	3.7e-05	0.369676	±	0.0057013	0.0008168	±	9.20091e-06	97.7211	±	5.11468	2.27763	0.0012997	98.8366	1.16337	75.1979	0.233816	5.56202	0.503443	18.5028	99.9987	0.00132259	85.8151	2.1914	11.9935	32.6869	0.0106354	1341.81	±	49.6425
40	90567-01AN	12.5	1.66717	±	0.0012087	0.0297504	±	6.85e-05	0.0019933	±	4.51e-05	0.444999	±	0.0055213	0.0010069	±	1.13e-05	96.2014	±	4.49776	3.79728	0.00128913	98.9605	1.03955	65.7163	0.382748	15.444	0.437558	18.0195	99.9985	0.00148198	84.2582	4.03034	11.7115	29.1713	0.0303232	1334.71	±	44.179
41	90567-01AO	13	2.56948	±	0.0018057	0.046259	±	9.19e-05	0.0033148	±	7.14e-05	0.771983	±	0.0093459	0.0017382	±	1.33e-05	95.7686	±	4.95443	4.23009	0.001299	98.8402	1.15982	68.1895	0.395158	14.1309	0.456458	16.828	99.9987	0.00132669	84.2224	4.00839	11.7692	32.5859	0.0297096	1323.29	±	48.5789
42	90567-01AP	13.5	2.44707	±	0.0016048	0.0440066	±	8.16e-05	0.0036631	±	5.95e-05	0.923538	±	0.0099153	0.0020134	±	1.42e-05	97.8366	±	6.11452	2.16207	0.00129364	98.5415	1.45854	73.1199	0.174061	11.7692	0.494148	14.4427	99.9989	0.00105179	86.1602	1.68446	12.1553	41.1027	0.0288309	1347.37	±	59.3902
43	90567-01AQ	14	2.35335	±	0.0015043	0.0427669	±	8.14e-05	0.0054989	±	6.76e-05	1.55165	±	0.0116678	0.0033785	±	1.82e-05	93.476	±	10.3658	6.52273	0.00129316	97.4784	2.52156	80.5544	0.336414	9.30701	0.553059	9.24912	99.9994	0.000601825	84.9169	2.91251	12.1706	71.8344	0.0356014	1304.87	±	103.088
44	90567-01AR	15	3.89619	±	0.0019035	0.072584	±	0.0001211	0.0139575	±	0.0001212	4.49216	±	0.023525	0.0094253	±	2.81e-05	99.8312	±	17.7805	0.167456	0.00130146	95.6987	4.30128	91.0492	0.00563336	2.24276	0.630815	6.07154	99.9997	0.000346369	87.3256	0.0443734	12.63	124.814	0.0130689	1360.86	±	170.328
Isotope abundances given in Volts at time-zero (spectrometer sensitivity is ~6.5 x 10-15 moles/Volt), and corrected for 37Ar and 39Ar decay, half lives of 34.95 days and 269 years, respectively.
Isotope sources calculated using the reactor constants in Renne et al. (2005).
Corrections were not made for cosmogenic 40Ar.
Ages calculated using the decay constants and standard calibration of Renne et al. (2011) and calculated relative to Hb3gr fluence monitor (1081 Ma, Renne et al. 2011).
40K/39K isotope abundance used is 0.01167 ± 0.0000205 (Steiger and Jäger 1977).

## Sheet: Nak2
COMPLETE 40Ar/39Ar INCREMENTAL HEATING RESULTS
#	Run ID	Laser Power	40Ar ± 1s			39Ar ± 1s			38Ar ± 1s			37Ar ± 1s			36Ar ± 1s			40Ar* (%) ± 1s			40Aratm (%)	40ArK (%)	39ArK (%)	39ArCa (%)	38Arcos (%)	38Aratm (%)	38ArCl (%)	38ArCa (%)	38ArK (%)	37ArCa (%)	37ArK (%)	36Arcos (%)	36Aratm (%)	36ArCa (%)	Ca/K	Cl/K	Apparent Age ± 1s (Ma)
Nakhla groundmass								J =	0.020047	±	6e-05
1	90567-02A	5	0.0049271	±	0.0002049	9.73e-05	±	2.9e-05	-4.44e-05	±	2.57e-05	0.0017989	±	0.0016986	2.13782e-06	±	4.97242e-06	154.927	±	188.129	-54.9285	0.00142308	98.7151	1.28491	-11.8094	0.734581	113.793	-0.07941	-2.63921	99.9988	0.00119602	158.852	-81.1509	22.2985	36.1462	-1.52546	1722.98	±	1389.33
2	90567-02B	6	-0.0009611	±	0.0002204	3.95e-05	±	2.51e-05	-2.52e-05	±	2.92e-05	-0.002	±	0.0016924	-9.05845e-06	±	4.76006e-06	-706.566	±	-932.621	806.569	-0.00310579	103.519	-3.519	21.8075	3.70717	76.3094	0.155556	-1.9796	100	-0.000457968	39.2921	54.857	5.85092	-94.4	-1.36383	2649.68	±	1999.26
3	90567-02C	6.5	0.180435	±	0.000522	0.0049552	±	3.26e-05	0.0002104	±	3.06e-05	0.0059136	±	0.0015918	6.58e-05	±	4.98777e-06	59.987	±	6.24429	40.011	0.0020031	99.9171	0.0829266	13.1761	4.13512	53.9249	0.0550783	28.7088	99.9812	0.0187541	27.2872	70.3316	2.38117	2.30477	0.0664557	657.139	±	57.4452
4	90567-02D	6.6	0.266024	±	0.0005798	0.0066838	±	3.63e-05	0.0002363	±	3e-05	0.0012177	±	0.0015341	3.88e-05	±	4.84062e-06	84.4682	±	9.34653	15.5299	0.00183388	99.9874	0.0126464	7.83745	2.10698	55.5419	0.0100878	34.5036	99.8771	0.122935	30.9143	68.255	0.830654	0.351233	0.0569526	931.65	±	80.6412
5	90567-02E	6.7	0.862973	±	0.0009368	0.019272	±	7.31e-05	0.0005301	±	4.18e-05	0.0131134	±	0.0018397	0.0001172	±	5.4519e-06	88.8314	±	1.77351	11.167	0.00162947	99.9527	0.0472749	15.1318	2.19082	38.2963	0.0484697	44.3326	99.9671	0.0329044	44.3276	52.7084	2.96408	1.31343	0.0305626	1060.59	±	16.2833
6	90567-02F	6.8	0.421926	±	0.0006527	0.0083121	±	4.02e-05	0.0002269	±	3.17e-05	0.0034003	±	0.001571	3.84e-05	±	5.35299e-06	92.9102	±	3.74064	7.0884	0.00143772	99.9716	0.0284154	12.4716	1.58849	41.2306	0.0293563	44.6799	99.9453	0.0547417	47.7285	49.9262	2.34528	0.789313	0.0326486	1203.56	±	35.6122
7	90567-02G	6.9	0.316351	±	0.0006303	0.006983	±	3.55e-05	0.0001296	±	2.83e-05	0.0035785	±	0.0016329	3.1e-05	±	4.94321e-06	93.4155	±	4.52197	6.58286	0.0016108	99.9644	0.0356003	19.899	1.93648	12.3988	0.0540956	65.7116	99.9563	0.0436953	53.8799	43.0624	3.0577	0.988965	0.00667569	1111.07	±	40.3694
8	90567-02H	7	0.611099	±	0.0007085	0.0124056	±	4.7e-05	0.0002824	±	2.83e-05	0.0079259	±	0.0017458	5.05e-05	±	5.27778e-06	95.9421	±	2.32745	4.05646	0.00148128	99.9556	0.0443878	17.7746	1.05786	27.5428	0.0549905	53.5698	99.965	0.0350449	64.3762	31.4661	4.15768	1.23319	0.0181905	1205.56	±	21.5799
9	90567-02I	7.1	1.88174	±	0.0014049	0.0353519	±	8.1e-05	0.0007678	±	3.35e-05	0.0285322	±	0.0016974	0.0001494	±	6.84656e-06	96.8115	±	0.904464	3.18713	0.00137067	99.9439	0.0560773	20.7924	0.941336	22.0523	0.0728153	56.1411	99.9723	0.0277384	69.2078	25.7327	5.05953	1.55813	0.0138973	1283.47	±	8.81417
10	90567-02J	7.2	1.90498	±	0.0015061	0.0346451	±	8.15e-05	0.0007523	±	4.88e-05	0.0250226	±	0.0019883	0.0001336	±	6.08477e-06	97.4635	±	0.915609	2.53512	0.00132695	99.9498	0.0501812	19.7056	0.773628	23.3001	0.0651723	56.1555	99.969	0.0309984	71.8665	23.1717	4.96178	1.39422	0.0146799	1319.77	±	9.0415
11	90567-02K	7.3	1.38399	±	0.0011086	0.0242075	±	6.51e-05	0.0005118	±	3.94e-05	0.019146	±	0.0020982	7.85e-05	±	5.91511e-06	99.6229	±	1.17927	0.375856	0.00127614	99.945	0.0549528	21.1458	0.122486	20.9857	0.0733012	57.6728	99.9717	0.0283062	89.2908	4.24777	6.46147	1.52687	0.0128739	1377.71	±	11.6792
12	90567-02L	7.4	1.95641	±	0.0014058	0.0347276	±	7.91e-05	0.0006997	±	3.48e-05	0.0290121	±	0.0018421	0.0001306	±	5.95147e-06	98.4387	±	0.841887	1.56	0.00129505	99.942	0.0580461	22.8058	0.525661	16.0713	0.0812469	60.516	99.9732	0.0267973	79.1346	14.9802	5.88526	1.61286	0.00939588	1352.16	±	8.39982
13	90567-02M	7.5	4.82595	±	0.0023038	0.083658	±	0.0001214	0.001626	±	5.64e-05	0.0615049	±	0.0023613	0.0003067	±	7.41761e-06	98.169	±	0.561005	1.82971	0.00126481	99.9489	0.0510805	22.2012	0.654451	14.333	0.0741162	62.7372	99.9695	0.0304526	76.2319	18.4555	5.31263	1.41922	0.00808297	1372.15	±	5.65113
14	90567-02N	7.6	3.7271	±	0.0019059	0.0642433	±	0.0001116	0.0013056	±	4.38e-05	0.0560375	±	0.0021014	0.0002438	±	7.46533e-06	98.5973	±	0.626168	1.40147	0.00125753	99.9394	0.0606072	23.1163	0.482145	16.3226	0.0841033	59.9949	99.9743	0.0256646	80.1766	13.734	6.08947	1.68407	0.00962569	1381.91	±	6.34222
15	90567-02O	7.7	3.06615	±	0.0018087	0.0531618	±	9.93e-05	0.0011625	±	4.61e-05	0.0537424	±	0.0023043	0.0001999	±	7.80219e-06	99.4606	±	0.734534	0.538157	0.00126481	99.9298	0.0702435	23.2542	0.171057	20.7321	0.0905908	55.7521	99.9779	0.0221424	87.5858	5.29132	7.12285	1.95202	0.0131565	1384.75	±	7.34813
16	90567-02P	7.8	2.05552	±	0.0013092	0.0359337	±	7.44e-05	0.0006959	±	3.93e-05	0.0352261	±	0.0021154	0.0001332	±	6.3759e-06	99.4286	±	0.86579	0.570108	0.00127528	99.9319	0.0681159	25.8158	0.202939	10.9287	0.0991915	62.9534	99.9772	0.0228344	87.3538	5.63964	7.0066	1.89285	0.00614194	1376.48	±	8.60325
17	90567-02Q	7.9	3.34031	±	0.0017057	0.0567833	±	0.0001017	0.0011608	±	3.58e-05	0.0471281	±	0.0018509	0.0002325	±	6.92875e-06	97.5895	±	0.624996	2.40922	0.00124024	99.9423	0.0576669	22.4028	0.835487	17.0373	0.0795539	59.6448	99.973	0.0269736	72.442	22.1879	5.37014	1.60232	0.0101062	1385.36	±	6.41686
18	90567-02R	8	3.3869	±	0.0022044	0.0572562	±	9.69e-05	0.0010435	±	4.59e-05	0.0514126	±	0.0022612	0.0002184	±	7.15277e-06	98.7132	±	0.662309	1.28552	0.00123331	99.9376	0.0623912	26.1702	0.502832	6.33154	0.0965439	66.8989	99.9751	0.0249304	80.9841	12.7792	6.2367	1.73367	0.00334849	1401.93	±	6.71982
19	90567-02S	8.1	2.96808	±	0.0018065	0.0501507	±	9.65e-05	0.0009637	±	4.98e-05	0.0488753	±	0.0024156	0.0002154	±	6.67725e-06	97.8659	±	0.722397	2.13291	0.00123262	99.9323	0.067717	25.9341	0.79166	9.72932	0.0993811	63.4455	99.977	0.022969	75.1486	18.8398	6.0116	1.88176	0.0054255	1394.07	±	7.38972
20	90567-02T	8.2	2.01958	±	0.0014074	0.0349314	±	8.07e-05	0.0007329	±	3.52e-05	0.0547209	±	0.0021844	0.0001757	±	7.06597e-06	99.1447	±	0.954434	0.854063	0.00126126	99.8911	0.108858	31.6309	0.283622	9.85496	0.14632	58.0842	99.9857	0.0142836	85.4549	6.29296	8.25212	3.02626	0.00600281	1384.39	±	9.55317
21	90567-02U	8.3	4.14518	±	0.0023036	0.0703374	±	0.0001117	0.0014306	±	4.13e-05	0.0815103	±	0.0022514	0.0003121	±	7.60695e-06	98.4921	±	0.643601	1.50671	0.0012377	99.9195	0.0805243	27.0322	0.526125	12.3954	0.111652	59.9347	99.9807	0.019314	80.2525	12.8279	6.9196	2.23795	0.0073171	1396.28	±	6.51983
22	90567-02V	8.4	3.0742	±	0.0017045	0.0528169	±	8.31e-05	0.0011356	±	4.65e-05	0.0866367	±	0.0025799	0.0002897	±	7.13243e-06	98.3407	±	0.81963	1.65805	0.00125276	99.886	0.113987	31.825	0.540926	10.8069	0.149511	56.6777	99.9864	0.0136403	80.7974	11.2787	7.92392	3.169	0.00674602	1383.06	±	8.18202
23	90567-02W	8.5	1.86509	±	0.0013065	0.0324006	±	6.49e-05	0.000724	±	4.95e-05	0.0789343	±	0.0021902	0.000233	±	6.9481e-06	98.1706	±	1.12942	1.82812	0.00126602	99.8307	0.1693	40.5679	0.567543	4.14559	0.21367	54.5053	99.9908	0.00917909	81.6429	9.38046	8.97668	4.7094	0.00269095	1371.24	±	11.2046
24	90567-02X	8.6	2.13976	±	0.0015071	0.0370464	±	7.72e-05	0.0008531	±	4.45e-05	0.0607572	±	0.0023742	0.0001823	±	6.95874e-06	99.8499	±	0.948353	0.148837	0.00126243	99.886	0.113967	29.7108	0.0449893	17.1857	0.139571	52.9189	99.9864	0.0136427	90.0494	1.11986	8.83075	3.16844	0.0114899	1390.36	±	9.40846
25	90567-02Y	8.7	3.13357	±	0.0021049	0.0538322	±	9.55e-05	0.001409	±	4.44e-05	0.126499	±	0.0025756	0.0003836	±	7.92853e-06	97.8865	±	0.970571	2.11226	0.00125203	99.8367	0.163301	33.7129	0.566121	19.0099	0.175951	46.5352	99.9905	0.00951682	80.2012	11.0607	8.73805	4.54226	0.0144529	1379.15	±	9.69764
26	90567-02Z	8.8	3.31721	±	0.0022036	0.0565671	±	8.61e-05	0.0012553	±	4.94e-05	0.0870999	±	0.0022824	0.000311	±	7.67866e-06	97.764	±	0.77507	2.23472	0.00124351	99.893	0.106998	29.5691	0.711677	14.6657	0.135976	54.9176	99.9855	0.0145321	77.2998	15.2796	7.42062	2.97449	0.00944818	1384.54	±	7.78318
27	90567-02AA	8.8	2.66859	±	0.001704	0.0461913	±	9.46e-05	0.0010437	±	5.59e-05	0.0687633	±	0.0024567	0.0002564	±	7.25885e-06	97.3013	±	0.849212	2.6974	0.00126227	99.8966	0.103447	28.4092	0.831161	16.6926	0.129114	53.938	99.985	0.0150315	74.8977	17.9964	7.1059	2.87566	0.0109493	1365.55	±	8.57131
28	90567-02AB	8.9	2.88614	±	0.0021035	0.0497832	±	8.88e-05	0.0011261	±	3.92e-05	0.0692967	±	0.0023433	0.0002459	±	7.23723e-06	98.4164	±	0.792933	1.58232	0.00125796	99.9033	0.0967263	27.1842	0.488729	18.3243	0.120593	53.8822	99.9839	0.0160767	80.6283	11.905	7.46672	2.68867	0.012032	1379.8	±	7.93379
29	90567-02AC	9	1.6848	±	0.0012077	0.0293179	±	7.36e-05	0.0007782	±	3.93e-05	0.0876001	±	0.0026003	0.0002366	±	7.42357e-06	98.8873	±	1.33897	1.11145	0.00126767	99.7924	0.207646	39.9559	0.289989	13.6666	0.220616	45.8668	99.9925	0.00748124	85.1158	5.0734	9.81077	5.77829	0.010542	1376.99	±	13.2563
30	90567-02AD	9.3	3.60562	±	0.0017051	0.0623185	±	9.86e-05	0.0018419	±	5.94e-05	0.225822	±	0.0052368	0.0006733	±	9.01265e-06	95.0775	±	1.33545	4.92124	0.00125853	99.7482	0.25183	41.8895	1.16097	15.536	0.240287	41.1733	99.9938	0.006166	74.219	16.8936	8.88744	7.01092	0.01335	1346.33	±	13.4127
31	90567-02AE	9.6	4.89242	±	0.0028034	0.0847194	±	0.0001213	0.0025392	±	5.09e-05	0.312533	±	0.0054687	0.0008851	±	1.13e-05	96.398	±	1.29979	3.60077	0.00126086	99.7436	0.256372	41.9175	0.836095	16.4048	0.241228	40.6005	99.9939	0.00605648	77.8847	12.7586	9.3567	7.1377	0.0142954	1357.7	±	12.9353
32	90567-02AF	9.9	6.69508	±	0.0039033	0.114936	±	0.0001314	0.0037524	±	8.23e-05	0.628947	±	0.0061914	0.0015039	±	1.23e-05	99.2682	±	1.68491	0.730529	0.00124844	99.6197	0.380299	53.7332	0.157079	8.55474	0.328506	37.2265	99.9959	0.00407789	86.8331	2.08473	11.0821	10.6011	0.00813042	1395.51	±	16.5337
33	90567-02AG	10.2	6.78151	±	0.0028066	0.11654	±	0.0001417	0.0042302	±	5.95e-05	0.77784	±	0.0082368	0.0018209	±	1.34e-05	99.1416	±	2.00758	0.857198	0.00124868	99.5361	0.463858	57.5785	0.165607	8.44099	0.360389	33.4545	99.9967	0.00334052	86.6339	2.04643	11.3197	12.9413	0.00892681	1394.08	±	19.7102
34	90567-02AH	10.5	4.5618	±	0.0020093	0.07923	±	0.0001219	0.0024914	±	6.04e-05	0.34786	±	0.0057471	0.0009576	±	1.15e-05	95.8877	±	1.49126	4.11101	0.001264	99.6949	0.305125	46.1828	0.907142	13.9571	0.273649	38.6793	99.9949	0.00508635	77.8202	12.5538	9.62595	8.49918	0.0127666	1350.27	±	14.8612
35	90567-02AI	10.8	2.25104	±	0.0015089	0.0392565	±	8.11e-05	0.002127	±	5.26e-05	0.551002	±	0.0076378	0.0011673	±	1.63e-05	102.268	±	4.20198	-2.26954	0.00126065	99.0245	0.975482	76.513	-0.289458	0.971733	0.507732	22.297	99.9984	0.00158034	90.2969	-2.80552	12.5086	27.3558	0.00154191	1415.09	±	40.3727
36	90567-02AJ	11.1	2.57871	±	0.0019054	0.0450092	±	9.47e-05	0.0021084	±	4.6e-05	0.483429	±	0.0100341	0.0010954	±	1.13e-05	98.363	±	3.34526	1.63575	0.00126464	99.2535	0.746461	68.8557	0.241101	4.6042	0.449393	25.8496	99.9979	0.00206996	85.8367	2.46844	11.6949	20.885	0.0063017	1374.17	±	32.7913
37	90567-02AK	11.4	2.14477	±	0.0014067	0.0374892	±	8.11e-05	0.0019087	±	5.99e-05	0.364751	±	0.0058544	0.0008408	±	1.04e-05	97.8499	±	3.0086	2.14882	0.00126737	99.3238	0.676184	57.806	0.290988	17.7282	0.374546	23.8003	99.9977	0.00228671	84.9905	3.51368	11.4958	18.9053	0.0263537	1367.08	±	29.5604
38	90567-02AL	11	0.843255	±	0.0009711	0.0148104	±	5.32e-05	0.0006401	±	4.02e-05	0.116218	±	0.0027312	0.0002823	±	7.20522e-06	96.3697	±	2.85249	3.62898	0.00127513	99.4546	0.545356	55.9339	0.576142	15.0601	0.355853	28.074	99.9972	0.002839	82.1419	6.94878	10.9093	15.2275	0.0189794	1346.7	±	28.2948
39	90567-02AM	12	1.7071	±	0.0012086	0.0301842	±	6.91e-05	0.0017669	±	4.01e-05	0.394468	±	0.0075544	0.000905	±	1.73e-05	96.0852	±	4.2524	3.9135	0.00127903	99.0917	0.908258	66.2064	0.455666	12.2483	0.437571	20.6521	99.9983	0.00169845	83.7174	4.73208	11.5505	25.4533	0.020983	1341.01	±	41.9576
40	90567-02AN	12.5	2.32916	±	0.0015051	0.0405282	±	9.55e-05	0.0020038	±	4.92e-05	0.386984	±	0.0065919	0.0009168	±	1.13e-05	96.3157	±	2.96424	3.683	0.0012618	99.3364	0.663606	58.5039	0.515917	16.0901	0.378516	24.5116	99.9977	0.00233035	82.8166	5.99793	11.1855	18.5513	0.0232244	1356.18	±	29.4437
41	90567-02AO	13	3.51206	±	0.0019046	0.0610079	±	8.47e-05	0.0031647	±	5.26e-05	0.680453	±	0.006372	0.0015491	±	1.01e-05	97.8329	±	3.22346	2.16583	0.00125825	99.2248	0.775154	64.4016	0.289658	11.5509	0.421418	23.3364	99.998	0.00199277	85.2123	3.14761	11.6401	21.694	0.0175122	1373.85	±	31.7336
42	90567-02AP	13.5	2.92483	±	0.0018064	0.050225	±	9.19e-05	0.0021984	±	4.62e-05	0.412141	±	0.0073587	0.0010132	±	1.15e-05	95.4643	±	2.55075	4.5345	0.0012464	99.4297	0.570295	57.5185	0.727037	13.6736	0.367438	27.7134	99.9973	0.00271417	80.8299	8.39093	10.7792	15.9278	0.0174563	1359.42	±	25.5871
43	90567-02AQ	14	2.51844	±	0.001309	0.0430592	±	8.5e-05	0.0017871	±	5.64e-05	0.360966	±	0.0052318	0.0008353	±	1.04e-05	98.5288	±	2.54751	1.46992	0.00124085	99.4174	0.582605	61.853	0.249637	8.27752	0.395879	29.224	99.9973	0.0026565	85.7077	2.84091	11.4514	16.2736	0.0100212	1394.17	±	25.1964
44	90567-02AR	15	5.20951	±	0.002304	0.0891217	±	0.0001212	0.0050839	±	6.12e-05	1.18384	±	0.0120399	0.0026722	±	1.62e-05	97.3977	±	3.7445	2.60111	0.00123732	99.0768	0.923183	68.9901	0.321212	9.04288	0.4564	21.1894	99.9983	0.00167074	85.0095	3.25059	11.7399	25.8755	0.0150989	1385.74	±	37.2338
Isotope abundances given in Volts at time-zero (spectrometer sensitivity is ~6.5 x 10-15 moles/Volt), and corrected for 37Ar and 39Ar decay, half lives of 34.95 days and 269 years, respectively.
Isotope sources calculated using the reactor constants in Renne et al. (2005).
Corrections were not made for cosmogenic 40Ar.
Ages calculated using the decay constants and standard calibration of Renne et al. (2011) and calculated relative to Hb3gr fluence monitor (1081 Ma, Renne et al. 2011).
40K/39K isotope abundance used is 0.01167 ± 0.0000205 (Steiger and Jäger 1977).

## Sheet: Nak3
COMPLETE 40Ar/39Ar INCREMENTAL HEATING RESULTS
#	Run ID	Laser Power	40Ar ± 1s			39Ar ± 1s			38Ar ± 1s			37Ar ± 1s			36Ar ± 1s			40Ar* (%) ± 1s			40Aratm (%)	40ArK (%)	39ArK (%)	39ArCa (%)	38Arcos (%)	38Aratm (%)	38ArCl (%)	38ArCa (%)	38ArK (%)	37ArCa (%)	37ArK (%)	36Arcos (%)	36Aratm (%)	36ArCa (%)	Ca/K	Cl/K	Apparent Age ± 1s (Ma)
Nakhla groundmass								J =	0.020047	±	6e-05
1	90567-03A	5	0.0004828	±	0.0002307	-7.69074e-06	±	2.93e-05	-2.87e-05	±	2.38e-05	0.0026219	±	0.0018592	8.66701e-06	±	4.72657e-06	-947.41	±	-1935.94	1047.41	-0.00143837	123.694	-23.6937	-25.4497	-2.12342	127.348	-0.179057	0.404384	100	-8.12733e-05	54.5817	37.4017	8.01665	-531.934	11.1418	4275.46	±	6008.44
2	90567-03B	6	0.0002269	±	0.0002126	-7.37e-05	±	2.5e-05	-3.05e-05	±	2.11e-05	-0.0020008	±	0.0016745	-1.36145e-06	±	4.40424e-06	-1890.58	±	-4126.81	1990.6	-0.0232639	98.1132	1.88676	18.8649	-1.78465	79.8988	0.128575	2.89238	99.9992	0.000809542	273.719	-212.663	38.9443	53.4026	0.977334	1416.82	±	1966.1
3	90567-03C	6.5	0.0925028	±	0.0003493	0.0023161	±	4.42e-05	0.0001418	±	3.34e-05	0.000692	±	0.0019447	1.72e-05	±	4.81288e-06	79.1338	±	23.5139	20.8644	0.00182741	99.9793	0.0207495	5.05758	1.64028	73.3698	0.00955785	19.9228	99.925	0.0749565	27.005	71.9297	1.06536	0.576329	0.130294	887.553	±	208.823
4	90567-03D	6.6	0.134825	±	0.0003223	0.0033842	±	5.06e-05	0.0001514	±	2.63e-05	0.0054215	±	0.001841	2.71e-05	±	4.877e-06	87.386	±	8.18258	12.6122	0.00183032	99.8887	0.111324	15.0559	1.35352	56.2805	0.0701761	27.2399	99.986	0.0139669	54.4772	40.2221	5.30073	3.09488	0.0730987	958.07	±	70.5019
5	90567-03E	6.7	0.292015	±	0.000537	0.006016	±	3.77e-05	0.0001335	±	2.46e-05	0.0018602	±	0.0017447	3.19e-05	±	4.59023e-06	89.726	±	6.60878	10.2725	0.0015036	99.9785	0.0214744	14.0849	2.70791	28.214	0.027291	54.9659	99.9276	0.0724274	38.1767	60.2792	1.54419	0.596469	0.0181606	1134.97	±	62.291
6	90567-03F	6.8	0.231973	±	0.0008475	0.0045012	±	3.48e-05	0.0001557	±	2.83e-05	0.0008542	±	0.0016906	2.61e-05	±	4.80265e-06	88.0724	±	11.3431	11.9262	0.0014163	99.9868	0.0131736	8.07164	2.14133	54.5114	0.0107402	35.2649	99.882	0.118021	31.1862	67.9475	0.866268	0.365875	0.0546894	1170.09	±	111.109
7	90567-03G	6.9	0.269514	±	0.0004851	0.0048831	±	3.32e-05	0.0001008	±	2.75e-05	0.0022257	±	0.0016324	2.27e-05	±	4.86776e-06	93.6717	±	5.54785	6.32701	0.00132221	99.9683	0.0316623	17.1243	2.0387	21.7115	0.0432562	59.0823	99.9509	0.0491292	49.2492	48.1538	2.59701	0.879534	0.0130014	1286.26	±	54.8457
8	90567-03H	7	0.164672	±	0.00037	0.0029812	±	3.16e-05	8.55e-05	±	2.14e-05	0.0008174	±	0.0019496	1.05e-05	±	4.55299e-06	95.7949	±	13.922	4.20379	0.00132133	99.981	0.0190403	10.5571	0.975726	45.9177	0.0187228	42.5307	99.9183	0.0816811	55.677	42.2617	2.06128	0.528845	0.0381976	1307.62	±	135.622
9	90567-03I	7.1	0.808553	±	0.0009062	0.0138315	±	4.66e-05	0.0002885	±	2.64e-05	0.0143115	±	0.0015916	6.44e-05	±	5.25159e-06	97.2088	±	1.50857	2.78996	0.00124788	99.9281	0.0718963	24.6975	0.94231	15.8148	0.0972079	58.4482	99.9784	0.0216332	71.6581	22.4541	5.88777	1.99798	0.00957307	1375.66	±	15.259
10	90567-03J	7.2	0.624031	±	0.0007174	0.0105532	±	4.43e-05	0.0002184	±	2.85e-05	0.0055066	±	0.0015976	4.03e-05	±	4.59651e-06	96.6437	±	2.21114	3.35504	0.00123408	99.9638	0.0362491	17.9713	1.15527	21.8944	0.049397	58.9297	99.9571	0.0429132	63.0783	33.3023	3.61941	1.007	0.0131449	1380.76	±	22.4341
11	90567-03K	7.3	0.655658	±	0.000679	0.0110682	±	4.05e-05	0.0002422	±	3.03e-05	0.0043133	±	0.0017553	4.92e-05	±	4.5967e-06	94.2788	±	2.60326	5.71998	0.00123198	99.9729	0.0270687	15.3106	1.86608	27.0513	0.0348853	55.7372	99.9425	0.0574643	48.8149	48.8632	2.32189	0.751896	0.0171712	1358.6	±	26.5882
12	90567-03L	7.4	0.646996	±	0.0007804	0.0110307	±	4.58e-05	0.0002378	±	2.64e-05	0.0083097	±	0.0018532	3.78e-05	±	5.21539e-06	98.9357	±	2.14531	1.06304	0.00124393	99.9477	0.0523405	20.251	0.348555	22.7701	0.06847	56.5619	99.9703	0.0297193	82.5125	11.6636	5.82385	1.45425	0.0142429	1395.77	±	21.4408
13	90567-03M	7.5	1.04221	±	0.0010082	0.018113	±	5.53e-05	0.0003917	±	2.99e-05	0.0143024	±	0.0022631	7.17e-05	±	5.47463e-06	97.6777	±	1.55644	2.32107	0.001268	99.9451	0.0548631	20.6567	0.744259	22.1432	0.0715465	56.3843	99.9716	0.0283525	73.0882	21.6272	5.2846	1.52437	0.0138944	1364.91	±	15.5188
14	90567-03N	7.6	0.949603	±	0.0008579	0.0165952	±	5e-05	0.0003621	±	2.3e-05	0.0133032	±	0.0017737	7.13e-05	±	5.67726e-06	96.8113	±	1.48618	3.18739	0.00127503	99.9443	0.0556977	20.6265	1.00735	22.4122	0.0719884	55.882	99.9721	0.0279275	67.8448	27.2122	4.94301	1.54757	0.0141896	1351.12	±	14.8639
15	90567-03O	7.7	1.00578	±	0.0009771	0.0178396	±	4.91e-05	0.0004306	±	3.12e-05	0.0170492	±	0.0021767	8e-05	±	4.86153e-06	97.1275	±	1.45005	2.87121	0.00129395	99.9336	0.0664052	20.4282	0.808217	28.1754	0.0775862	50.5106	99.9766	0.0234229	71.2143	23.1395	5.64622	1.84528	0.0197354	1340.24	±	14.34
16	90567-03P	7.8	0.921923	±	0.0009916	0.0166344	±	5.69e-05	0.0005355	±	3.69e-05	0.0164828	±	0.0020572	9.43e-05	±	6.01748e-06	93.9491	±	1.6321	6.04961	0.00131624	99.9311	0.068851	15.622	1.25515	45.1914	0.0603156	37.8711	99.9774	0.0225905	57.4563	37.9128	4.63092	1.9133	0.0422187	1293.15	±	16.3266
17	90567-03Q	7.9	1.64268	±	0.0014084	0.029784	±	7.63e-05	0.0007982	±	4.07e-05	0.0393987	±	0.0023787	0.0001905	±	6.65413e-06	93.8098	±	1.11362	6.18892	0.00132237	99.9081	0.09192	22.2241	1.53494	30.6631	0.0967281	45.4812	99.9831	0.016918	60.3106	34.2097	5.47973	2.55495	0.0238529	1287.5	±	11.1577
18	90567-03R	8	0.73177	±	0.0007418	0.0136325	±	4.88e-05	0.0003694	±	3.07e-05	0.020077	±	0.0018691	8.65e-05	±	5.49676e-06	94.6911	±	1.76073	5.30755	0.00135856	99.8977	0.102339	23.5251	1.26708	30.1239	0.10651	44.9773	99.9848	0.0151943	65.0677	28.7825	6.14982	2.84485	0.023696	1271.31	±	17.2652
19	90567-03S	8.1	0.813393	±	0.0009378	0.0152138	±	4.96e-05	0.0003436	±	3.03e-05	0.0159586	±	0.0021482	8.19e-05	±	5.32921e-06	94.9124	±	1.77058	5.08624	0.00136441	99.9271	0.0728869	22.9856	1.45103	21.493	0.0910133	53.9794	99.9787	0.021339	62.4566	32.3809	5.16255	2.02553	0.0140873	1269.53	±	17.2424
20	90567-03T	8.2	1.09589	±	0.0009677	0.0212255	±	6.43e-05	0.0005247	±	3.61e-05	0.0264881	±	0.0019199	0.0001365	±	5.81983e-06	92.8129	±	1.34089	7.18567	0.00141266	99.9133	0.0867161	23.2477	1.80866	25.5353	0.0989277	49.3094	99.9821	0.017934	57.8776	36.9809	5.14146	2.41018	0.0183218	1218.16	±	13.0606
21	90567-03U	8.3	0.898744	±	0.0011084	0.0165796	±	5.28e-05	0.0004627	±	3.29e-05	0.0320481	±	0.0020676	0.000115	±	6.16473e-06	95.7883	±	1.62449	4.21032	0.00134486	99.8657	0.134327	27.4469	0.985564	27.7751	0.13574	43.6567	99.9884	0.0115727	71.5233	21.0925	7.38414	3.73524	0.0225094	1291.19	±	15.8839
22	90567-03V	8.4	0.702259	±	0.0008312	0.0130841	±	5.28e-05	0.0002676	±	2.76e-05	0.0215155	±	0.0016503	8.43e-05	±	5.4009e-06	95.4409	±	1.72016	4.55776	0.00135854	99.8857	0.11427	33.512	1.44144	5.30617	0.157566	59.5828	99.9864	0.0136064	68.8988	24.3386	6.76255	3.17689	0.00315078	1278.54	±	16.8956
23	90567-03W	8.5	0.748888	±	0.0007495	0.0139508	±	4.91e-05	0.0003176	±	3.33e-05	0.0248301	±	0.0020448	9.59e-05	±	5.30662e-06	95.0045	±	1.75316	4.99414	0.00135821	99.8763	0.123683	31.7678	1.41916	13.1368	0.153214	53.5231	99.9874	0.0125699	68.1399	24.9997	6.86043	3.4389	0.00868372	1274.57	±	17.1591
24	90567-03X	8.6	0.735953	±	0.0009865	0.0134624	±	5.07e-05	0.0003801	±	2.87e-05	0.0356927	±	0.0019565	0.0001018	±	5.7193e-06	98.2889	±	1.8428	1.70974	0.00133289	99.8158	0.184249	34.2338	0.398947	22.0528	0.184035	43.1304	99.9916	0.00843316	82.7861	7.92331	9.29054	5.126	0.01809	1323.5	±	17.9046
25	90567-03Y	8.7	0.987815	±	0.0010072	0.0179491	±	5.28e-05	0.0004787	±	3.28e-05	0.0403821	±	0.0022408	0.0001467	±	6.09184e-06	94.2078	±	1.56841	5.79092	0.00132437	99.8437	0.156346	32.0382	1.4401	20.6834	0.165325	45.673	99.9901	0.00994082	67.7102	24.9959	7.29393	4.3485	0.0160221	1290	±	15.5641
26	90567-03Z	8.8	0.901872	±	0.0009103	0.0163088	±	5.16e-05	0.0003951	±	3.37e-05	0.0340029	±	0.0021377	0.0001236	±	6.28944e-06	94.9479	±	1.65316	5.05078	0.00131817	99.8551	0.144888	33.3695	1.38941	14.7867	0.168662	50.2858	99.9893	0.0107281	69.0861	23.6244	7.28948	4.02934	0.0104036	1301.59	±	16.3946
27	90567-03AA	8.8	0.606164	±	0.00074	0.0110808	±	4.23e-05	0.0002836	±	3.21e-05	0.0268937	±	0.0017511	8.75e-05	±	5.3825e-06	96.0096	±	1.9909	3.98911	0.0013322	99.8313	0.168665	35.319	1.02753	15.8803	0.185849	47.5874	99.9908	0.00921373	74.1411	17.7147	8.1442	4.6917	0.0118066	1302.08	±	19.5381
28	90567-03AB	8.9	0.537543	±	0.0007195	0.0095688	±	4.01e-05	0.0002763	±	2.93e-05	0.0112509	±	0.001815	5.71e-05	±	5.18966e-06	94.2665	±	2.28861	5.73217	0.00129841	99.9183	0.0817019	19.2049	1.34395	37.155	0.0797958	42.2164	99.981	0.0190355	60.1878	34.5917	5.22053	2.2707	0.0311382	1308.93	±	22.9155
29	90567-03AC	9	0.565431	±	0.0006718	0.0101665	±	4.12e-05	0.000276	±	3.07e-05	0.0224678	±	0.0019492	7.64e-05	±	5.31029e-06	95.8831	±	2.15769	4.1156	0.00131053	99.8464	0.153578	31.0643	1.0161	22.8902	0.159538	44.8699	99.9899	0.0101203	72.6825	19.5252	7.79236	4.2714	0.018049	1316.13	±	21.3504
30	90567-03AD	9.3	1.35291	±	0.0012086	0.023978	±	6.95e-05	0.0007529	±	3.62e-05	0.0987221	±	0.0028845	0.0002803	±	6.968e-06	95.3328	±	1.7195	4.66586	0.0012901	99.7139	0.28613	43.8192	1.01041	16.1706	0.256986	38.7428	99.9946	0.00542503	76.231	14.4362	9.33284	7.96856	0.014767	1325.46	±	17.1428
31	90567-03AE	9.6	2.51091	±	0.0014075	0.0438234	±	8.02e-05	0.0012299	±	3.98e-05	0.115496	±	0.0032278	0.0003507	±	7.79425e-06	97.0782	±	1.1425	2.92057	0.00127175	99.8168	0.183151	34.2831	0.718557	21.4233	0.184042	43.391	99.9915	0.0084838	77.8694	13.4041	8.72652	5.0954	0.017468	1356.2	±	11.3514
32	90567-03AF	9.9	3.30638	±	0.0018047	0.0575018	±	0.0001015	0.0018354	±	5.99e-05	0.243948	±	0.0042339	0.00066	±	9.95724e-06	96.7	±	1.48069	3.29875	0.00126581	99.7052	0.294834	44.2019	0.71615	16.7124	0.260495	38.1091	99.9947	0.00526441	79.6123	10.5933	9.79436	8.21169	0.0155156	1356.94	±	14.7027
33	90567-03AG	10.2	4.31187	±	0.0024034	0.0739309	±	9.46e-05	0.0018986	±	5e-05	0.183847	±	0.0032706	0.0005502	±	8.10953e-06	97.8037	±	0.953841	2.195	0.00124949	99.8272	0.172813	35.8484	0.600759	15.9367	0.189775	47.4243	99.991	0.00899222	80.119	11.027	8.85405	4.80728	0.0118893	1380.3	±	9.48084
34	90567-03AH	10.5	4.2714	±	0.0020048	0.0728526	±	9.3e-05	0.001856	±	4.93e-05	0.147835	±	0.0032898	0.0004788	±	9.11471e-06	97.6057	±	0.86695	2.39304	0.00124332	99.859	0.141016	31.1217	0.663705	20.238	0.156101	47.8205	99.989	0.0110231	78.1339	13.6849	8.18126	3.92151	0.0149731	1383.12	±	8.66308
35	90567-03AI	10.8	4.20477	±	0.0022058	0.0722823	±	0.0001123	0.0018772	±	5.66e-05	0.199335	±	0.0038112	0.0005687	±	9.24571e-06	98.1634	±	1.04774	1.83533	0.0012525	99.8084	0.191647	38.3624	0.495426	14.0475	0.208111	46.8865	99.9919	0.00810704	82.0137	8.69857	9.28778	5.33222	0.0106001	1381.51	±	10.4068
36	90567-03AJ	11.1	5.14694	±	0.0025043	0.0882076	±	0.0001317	0.0023772	±	5.41e-05	0.291468	±	0.0047203	0.0007856	±	1.02e-05	98.4228	±	1.15965	1.57591	0.00124819	99.7704	0.229636	42.6316	0.411196	11.552	0.240299	45.165	99.9932	0.00676339	83.5504	6.61843	9.83119	6.39163	0.00904923	1387.4	±	11.4956
37	90567-03AK	11.4	4.4807	±	0.0023043	0.0765598	±	0.0001117	0.0020115	±	4.8e-05	0.258496	±	0.0056697	0.0006907	±	9.98741e-06	98.5181	±	1.22348	1.48066	0.00124439	99.7654	0.234644	44.495	0.39748	8.53009	0.251861	46.3255	99.9934	0.00661872	83.9257	6.15726	9.91704	6.53134	0.00651465	1391.3	±	12.1256
38	90567-03AL	11	3.13943	±	0.0016073	0.0543317	±	8.82e-05	0.0013703	±	4.72e-05	0.14178	±	0.0033526	0.0004092	±	9.29059e-06	98.2292	±	1.08645	1.76957	0.00126106	99.8187	0.181347	37.8614	0.488579	13.1626	0.202777	48.2847	99.9914	0.00856836	82.1163	8.70277	9.18096	5.04511	0.00964474	1375.59	±	10.7566
39	90567-03AM	12	5.15793	±	0.0023068	0.0894035	±	0.0001221	0.0027291	±	5.92e-05	0.410257	±	0.0062923	0.0010695	±	1.15e-05	97.3425	±	1.51707	2.65629	0.00126129	99.6811	0.318908	49.3881	0.605012	9.8733	0.294626	39.8389	99.9951	0.00486586	81.6233	8.21192	10.1648	8.88433	0.00876825	1366.7	±	14.998
40	90567-03AN	12.5	7.24603	±	0.0030054	0.124943	±	0.0001518	0.0036948	±	5.55e-05	0.594232	±	0.0069148	0.0014833	±	1.25e-05	98.5331	±	1.51144	1.4656	0.00125457	99.6695	0.330529	52.5599	0.346385	5.65963	0.315211	41.1189	99.9953	0.00469423	84.7947	4.58947	10.6158	9.20917	0.00486973	1383.55	±	14.8732
41	90567-03AO	13	8.41671	±	0.0038034	0.14586	±	0.0001515	0.0056057	±	8.54e-05	1.07421	±	0.0092605	0.002504	±	1.53e-05	98.8337	±	2.18945	1.16509	0.00125861	99.4882	0.511829	59.3968	0.210816	8.43483	0.375581	31.5819	99.997	0.00302598	86.1215	2.51039	11.3681	14.2865	0.0094492	1383.39	±	21.4376
42	90567-03AP	13.5	8.9591	±	0.0033039	0.155547	±	0.0001914	0.0053973	±	8.94e-05	0.893025	±	0.0118749	0.0022495	±	1.43e-05	97.0408	±	1.79368	2.95791	0.00126236	99.601	0.398996	52.7221	0.591706	11.3425	0.324285	35.0195	99.9961	0.00388607	81.9286	7.5516	10.5198	11.1244	0.0114593	1362.91	±	17.7297
43	90567-03AQ	14	7.69827	±	0.0033046	0.133225	±	0.0001618	0.0056184	±	9.17e-05	1.01478	±	0.0125106	0.0024819	±	1.73e-05	96.3005	±	2.29481	3.69825	0.00125664	99.4706	0.529369	55.8001	0.610674	14.4593	0.354001	28.7759	99.9971	0.00292521	81.8119	7.35327	10.8348	14.7787	0.0177777	1359.93	±	22.8039
44	90567-03AR	15	6.72957	±	0.0032065	0.117277	±	0.0001427	0.0076138	±	7.89e-05	1.77977	±	0.013775	0.0039897	±	2.13e-05	97.0449	±	4.28654	2.95386	0.00125876	98.9453	1.0547	68.7588	0.314636	11.8748	0.458154	18.5937	99.9985	0.00146046	84.9849	3.19383	11.8212	29.6011	0.0225953	1365.69	±	42.3543
Isotope abundances given in Volts at time-zero (spectrometer sensitivity is ~6.5 x 10-15 moles/Volt), and corrected for 37Ar and 39Ar decay, half lives of 34.95 days and 269 years, respectively.
Isotope sources calculated using the reactor constants in Renne et al. (2005).
Corrections were not made for cosmogenic 40Ar.
Ages calculated using the decay constants and standard calibration of Renne et al. (2011) and calculated relative to Hb3gr fluence monitor (1081 Ma, Renne et al. 2011).
40K/39K isotope abundance used is 0.01167 ± 0.0000205 (Steiger and Jäger 1977).

## Sheet: Nak4
COMPLETE 40Ar/39Ar INCREMENTAL HEATING RESULTS
#	Run ID	Laser Power	40Ar ± 1s			39Ar ± 1s			38Ar ± 1s			37Ar ± 1s			36Ar ± 1s			40Ar* (%) ± 1s			40Aratm (%)	40ArK (%)	39ArK (%)	39ArCa (%)	38Arcos (%)	38Aratm (%)	38ArCl (%)	38ArCa (%)	38ArK (%)	37ArCa (%)	37ArK (%)	36Arcos (%)	36Aratm (%)	36ArCa (%)	Ca/K	Cl/K	Apparent Age ± 1s (Ma)
Nakhla groundmass								J =	0.025361	±	2.99e-05
1	61268-01A	1.35	-0.0002534	±	0.0001678	-4.83e-05	±	1.82e-05	9.88819e-06	±	2.34e-05	-0.0014489	±	0.0003359	-1.9e-05	±	3.89648e-06	-10050.9	±	-7091.17	10150.9	0.0136243	97.9152	2.08484	-33.2168	-31.3494	170.688	-0.287193	-5.83499	99.9993	0.00073115	11.1963	86.7829	2.02082	59.1283	-1.03496	#NUM!	±	888.476
2	61268-01B	1.63636	0.0013532	±	0.0001637	2.26e-05	±	2.07e-05	-8.5e-05	±	3.79e-05	-0.0007596	±	0.0006183	-1.29e-05	±	4.17779e-06	1441.76	±	524.458	-1341.76	0.00124766	102.336	-2.33595	1.92502	2.57426	95.8152	0.0175156	-0.331954	100.001	-0.000682024	8.21516	90.2244	1.56043	-63.3882	-10.2121	5621.15	±	1656.06
3	61268-01C	1.72727	0.0007256	±	0.0001669	1.86e-05	±	1.95e-05	-4.43e-05	±	2.71e-05	-0.0020069	±	0.0004075	-1.26e-05	±	4.24193e-06	2082.38	±	1040.98	-1982.39	0.0020116	107.499	-7.49892	9.9246	3.91305	86.6242	0.0887931	-0.550647	100	-0.000223172	22.5995	73.1796	4.22087	-193.717	-5.56575	5431.6	±	1841.52
4	61268-01D	2	0.0671585	±	0.0002517	0.003247	±	2.92e-05	0.0001929	±	2.68e-05	0.0028319	±	0.0009331	3.81e-05	±	4.30908e-06	31.3772	±	11.967	68.6193	0.00352729	99.9394	0.0605995	6.25036	2.87904	70.3186	0.0287667	20.5233	99.9743	0.0256678	20.4958	77.535	1.96919	1.68386	0.121222	275.659	±	97.5349
5	61268-01E	2.1	1.47084	±	0.0010042	0.0426266	±	0.0001605	0.0012265	±	6.41e-05	0.0453594	±	0.0013982	0.000276	±	5.62987e-06	84.113	±	1.11374	15.8849	0.00211406	99.9261	0.0739401	14.3778	2.2957	40.8846	0.072471	42.3693	99.979	0.0210349	41.3814	54.2644	4.35424	2.05482	0.0341402	997.98	±	10.5455
6	61268-01F	2.2	0.305084	±	0.000837	0.0079817	±	4.26e-05	0.0001961	±	2.26e-05	0.0074371	±	0.0008089	3.08e-05	±	5.75391e-06	95.4197	±	3.21827	4.57838	0.00190861	99.9353	0.0647424	15.6493	0.858395	33.7934	0.0743152	49.6245	99.976	0.0240247	64.532	29.0708	6.39727	1.79905	0.0240932	1184.74	±	29.583
7	61268-01G	2.09091	1.51403	±	0.0021032	0.0356909	±	8.28e-05	0.0008263	±	3.66e-05	0.0278423	±	0.0014335	0.0001336	±	5.03793e-06	95.3528	±	0.848915	4.64552	0.00171993	99.9458	0.0542011	15.1612	1.0258	31.0794	0.0660235	52.6677	99.9713	0.0286989	60.7318	33.7472	5.52103	1.50597	0.0208778	1277.02	±	8.32973
8	61268-01H	2.2	6.70726	±	0.0042026	0.1447	±	0.0003807	0.0026737	±	5.75e-05	0.113073	±	0.002378	0.0004456	±	7.56371e-06	97.9886	±	0.487993	2.00987	0.00157402	99.9457	0.0542939	19.0122	0.607624	14.3071	0.0828664	65.9902	99.9714	0.0286498	73.8845	19.393	6.72257	1.50855	0.0076706	1386.22	±	5.41974
9	61268-01I	2.27273	3.12685	±	0.0024045	0.0675729	±	0.0002307	0.0010836	±	7.74e-05	0.0481185	±	0.0013357	0.000161	±	7.75488e-06	99.9383	±	0.598171	0.0601141	0.00157679	99.9505	0.0494752	20.9525	0.0209049	2.89844	0.0870087	76.0411	99.9686	0.0314408	91.334	0.748399	7.91764	1.3746	0.00134857	1403.66	±	6.68554
10	61268-01J	2.36364	6.74324	±	0.0053014	0.145141	±	0.0001909	0.002728	±	5.44e-05	0.119086	±	0.0025544	0.0004327	±	6.8464e-06	98.5453	±	0.494169	1.45315	0.00157035	99.943	0.0570083	19.1493	0.43288	15.4601	0.0855373	64.8722	99.9727	0.0272853	78.1921	14.5167	7.29127	1.58401	0.00843161	1393.97	±	4.97969
11	61268-01K	2.7	11.5131	±	0.0100007	0.247391	±	0.000601	0.0048163	±	5.53e-05	0.26814	±	0.0025912	0.0008254	±	1.33e-05	98.8533	±	0.541557	1.14516	0.00156742	99.9247	0.0753137	21.4737	0.3299	15.4689	0.109098	62.6184	99.9793	0.020651	81.1536	10.2394	8.60704	2.09302	0.00874007	1398.83	±	5.77606
12	61268-01L	2.54545	3.13144	±	0.0028024	0.0677365	±	0.0001413	0.0012222	±	3.71e-05	0.0624668	±	0.0018493	0.0001924	±	6.2442e-06	99.5949	±	0.612555	0.403558	0.00157806	99.9359	0.0640775	21.1917	0.124606	11.0123	0.100152	67.5712	99.9757	0.0242741	87.1879	4.21036	8.60171	1.78056	0.00576597	1399.52	±	6.26778
13	61268-01M	2.9	7.16987	±	0.0062016	0.154389	±	0.0003812	0.0028243	±	9.63e-05	0.207836	±	0.0028007	0.0005992	±	7.88687e-06	98.5143	±	0.611957	1.48409	0.00157043	99.9065	0.0935444	26.018	0.454039	6.75569	0.144209	66.6281	99.9834	0.016624	79.4264	11.3835	9.19014	2.60014	0.00358732	1393.62	±	6.44083
14	61268-01N	2.72727	7.92013	±	0.0059014	0.173304	±	0.0002411	0.0035667	±	7.83e-05	0.258277	±	0.0040887	0.0006991	±	8.64078e-06	98.8023	±	0.659968	1.19609	0.0015957	99.8964	0.103561	24.6724	0.320084	15.6478	0.141909	59.2179	99.985	0.0150149	81.525	8.68627	9.78875	2.87885	0.00934883	1380.99	±	6.54997
15	61268-01O	3	9.76496	±	0.0079013	0.215249	±	0.000601	0.0052362	±	0.0001907	0.795161	±	0.0085099	0.0016066	±	1.27e-05	99.8411	±	1.23274	0.157276	0.00160501	99.7433	0.256728	40.8705	0.0353468	8.77368	0.297624	50.0228	99.994	0.00604808	86.2723	0.612775	13.115	7.14762	0.00620542	1385.47	±	12.2277
16	61268-01P	3.2	4.249	±	0.0043024	0.0943475	±	0.0001711	0.0018452	±	9.24e-05	0.216276	±	0.0029396	0.0004794	±	7.84418e-06	99.8649	±	0.908609	0.133529	0.00161836	99.8407	0.159302	35.0149	0.0370556	2.4375	0.22971	62.2808	99.9902	0.00975611	87.2873	0.75865	11.954	4.43084	0.00138467	1377.7	±	8.8922
17	61268-01Q	3.3	3.67449	±	0.0046018	0.0816034	±	0.0002207	0.0019122	±	6.93e-05	0.268045	±	0.0030749	0.0005991	±	1.16e-05	97.86	±	1.23098	2.1384	0.00161749	99.7717	0.228273	38.5721	0.495206	8.71316	0.274726	51.9448	99.9932	0.00680388	79.737	8.40741	11.8556	6.35359	0.0059346	1358.75	±	12.2341
18	61268-01R	3.09091	2.14601	±	0.0018056	0.0481318	±	9.4e-05	0.0011822	±	3.64e-05	0.142909	±	0.0024345	0.0003379	±	6.59274e-06	97.0916	±	1.17724	2.90676	0.0016339	99.7937	0.206338	33.9629	0.635893	15.596	0.236914	49.5683	99.9925	0.00752878	76.9592	11.8339	11.2068	5.7418	0.0111318	1341.65	±	11.606
19	61268-01S	3.18182	2.86353	±	0.0026029	0.0648353	±	0.0002406	0.0024695	±	4.45e-05	0.500193	±	0.0044423	0.0009495	±	9.28251e-06	98.5391	±	2.39719	1.45928	0.00164398	99.4638	0.536165	49.4034	0.203923	18.1371	0.396983	31.8587	99.9971	0.00288793	83.2192	2.82113	13.9597	14.9694	0.0201417	1349.86	±	23.392
20	61268-01T	3.6	2.38971	±	0.0027034	0.0544205	±	0.0001209	0.002132	±	4.1e-05	0.38472	±	0.0024725	0.0007388	±	8.74736e-06	98.4428	±	2.24083	1.55551	0.00165425	99.5087	0.491308	44.3954	0.210118	24.0527	0.353672	30.9882	99.9968	0.00315302	82.9756	3.22527	13.7991	13.7109	0.0274615	1343.02	±	21.6524
21	61268-01U	3.36364	1.70402	±	0.0023038	0.0391897	±	0.0001707	0.0016423	±	5.15e-05	0.307231	±	0.0037675	0.0005771	±	1.03e-05	98.9839	±	2.62362	1.01444	0.00166973	99.4552	0.544835	45.5599	0.126848	24.9927	0.366654	28.9539	99.9972	0.00284173	83.9725	1.92012	14.1074	15.2128	0.0305397	1339.39	±	25.385
22	61268-01V	3.45455	1.4833	±	0.0013049	0.0341809	±	9.57e-05	0.0015617	±	3.18e-05	0.327292	±	0.0033238	0.0006313	±	7.56868e-06	96.098	±	3.02503	3.90035	0.00167101	99.3345	0.665467	50.1732	0.446445	22.4452	0.410756	26.5244	99.9977	0.00232379	80.3871	5.87451	13.7384	18.6037	0.0299388	1310.88	±	29.4571
23	61268-01W	3.54545	1.22031	±	0.001206	0.028228	±	8.18e-05	0.0013344	±	3.39e-05	0.278889	±	0.0058184	0.0005437	±	7.09692e-06	95.089	±	3.31187	4.90937	0.00167702	99.3134	0.686635	49.9153	0.541058	23.5032	0.40963	25.6308	99.9977	0.00225167	79.3439	7.06338	13.5928	19.1995	0.0324432	1297.73	±	32.3528
24	61268-01X	3.63636	0.863805	±	0.0008757	0.020043	±	7.08e-05	0.0010191	±	3.79e-05	0.216773	±	0.0033676	0.0004228	±	6.73853e-06	94.1752	±	3.58271	5.82314	0.0016811	99.2483	0.751655	50.4686	0.594825	24.7059	0.416904	23.8138	99.9979	0.00205555	78.7872	7.62629	13.5865	21.0314	0.0367053	1286.58	±	35.1615
25	61268-01Y	4.2	1.35993	±	0.0024023	0.0408575	±	0.0001407	0.0279266	±	0.0002604	12.658	±	0.106156	0.020307	±	6.01e-05	236.581	±	113.258	-136.583	0.00172096	78.4683	21.5317	100.31	-0.801546	-1.79767	0.888389	1.40058	99.9999	5.67347e-05	89.345	-5.86331	16.5183	762.003	-0.045411	2288.32	±	621.487
26	61268-01Z	4.09091	0.176834	±	0.0004456	0.0039549	±	5.77e-05	0.0004603	±	2.34e-05	0.177828	±	0.0023095	0.0003063	±	6.92293e-06	99.6711	±	14.0082	0.327285	0.00158163	96.875	3.12499	86.8118	0.0151524	2.26121	0.757206	10.1547	99.9995	0.000482608	84.4939	0.121121	15.385	89.5795	0.0078783	1398.06	±	137.6
27	61268-01AA	4.8	0.322128	±	0.0062009	0.0084717	±	0.0005208	0.0014894	±	0.0004003	0.0585289	±	0.0123457	0.0003331	±	1.04e-05	-8.53175	±	-11.9723	108.53	0.00191062	99.5199	0.480143	9.69116	2.82878	80.497	0.0770196	6.90604	99.9968	0.0032267	28.065	67.2788	4.65616	13.3978	0.412391	-156.024	±	-228.866
28	61268-01AB	5.1	0.308411	±	0.000615	0.0069753	±	4.07e-05	0.0005341	±	4.51e-05	0.150126	±	0.0017115	0.0003019	±	5.82711e-06	80.0606	±	6.88426	19.9378	0.00162634	98.5042	1.4958	64.3791	1.38745	17.9878	0.550917	15.6948	99.999	0.0010252	73.7662	13.0563	13.1776	42.1689	0.040549	1171.36	±	74.2915
29	61268-01AC	4.90909	0.238591	±	0.000589	0.0052044	±	6.91e-05	0.0004998	±	2.8e-05	0.172165	±	0.0024551	0.0003081	±	6.2478e-06	93.2504	±	10.0318	6.74809	0.00155574	97.7009	2.29909	77.8969	0.388215	8.62802	0.675153	12.4117	99.9993	0.000661564	81.8422	3.3498	14.808	65.3477	0.0245944	1349.86	±	103.104
30	61268-01AD	5.7	0.219567	±	0.0005025	0.0049428	±	3.78e-05	0.0004873	±	2.74e-05	0.175435	±	0.0033507	0.0003319	±	6.09846e-06	79.478	±	11.2831	20.5204	0.00160281	97.5332	2.46676	81.2803	1.11426	4.83027	0.705625	12.0695	99.9994	0.00061554	77.2907	8.70201	14.0073	70.2338	0.0141592	1177.64	±	123.034
31	61268-01AE	5.45455	0.14483	±	0.0003991	0.00315	±	3.29e-05	0.0003456	±	2.52e-05	0.142085	±	0.0018841	0.0002789	±	5.66325e-06	62.865	±	13.8027	37.1335	0.00153795	96.8651	3.13487	92.3778	1.87536	-5.83017	0.8058	10.7712	99.9995	0.000481038	74.1388	12.3609	13.5003	89.872	-0.0191503	1018.84	±	171.209
Isotope abundances given in Volts at time-zero (spectrometer sensitivity is ~6.5 x 10-15 moles/Volt), and corrected for 37Ar and 39Ar decay, half lives of 34.95 days and 269 years, respectively.
Isotope sources calculated using the reactor constants in Renne et al. (2005).
Corrections were not made for cosmogenic 40Ar.
Ages calculated using the decay constants and standard calibration of Renne et al. (2011) and calculated relative to Hb3gr fluence monitor (1081 Ma, Renne et al. 2011).
40K/39K isotope abundance used is 0.01167 ± 0.0000205 (Steiger and Jäger 1977).

[truncated: 10 more sheets: Nak5, NWA5790_1, NWA5790_2, NWA5790_3, Y593_1, Y593_2, Y593_3, Y749_1, Y749_2, Y749_3]
